# Supplementary material for: Electronic effects of substituents on the stability of the iridanaphthalene compound [IrCp*{C(OMe)CHC(o-C6H4)(Ph)}(PMe3)]PF6
Source: Royal Society of Chemistry journal article supplement (doi:10.1039/c4dt02744b), 2014-01-01
Supplement: c4dt02744b1.fcf [file c4dt02744b1.fcf]

# 
# h,k,l, Fc-squared, Fo-squared, sigma(Fo-squared) and status flag 
# 
data_md 
_shelx_title ' Iridanaphtalene in P2(1)/n' 
_shelx_refln_list_code          4 
_shelx_F_calc_maximum      420.73 
_exptl_crystal_F_000      2176.00 
_reflns_d_resolution_high  0.7548 
 
loop_ 
 _symmetry_equiv_pos_as_xyz 
 'x, y, z' 
 '-x+1/2, y+1/2, -z+1/2' 
 '-x, -y, -z' 
 'x-1/2, -y-1/2, z-1/2' 
 
_cell_length_a    18.6960 
_cell_length_b    11.6073 
_cell_length_c    24.0316 
_cell_angle_alpha  90.000 
_cell_angle_beta  112.526 
_cell_angle_gamma  90.000 
 
_shelx_F_squared_multiplier     1.000 
 
loop_ 
 _refln_index_h 
 _refln_index_k 
 _refln_index_l 
 _refln_F_squared_calc 
 _refln_F_squared_meas 
 _refln_F_squared_sigma 
 _refln_observed_status 
   2   0   0    96461.16   100633.82   1932.87 o 
   4   0   0    58447.27    60053.84    767.32 o 
   6   0   0    11470.08    11235.56    184.00 o 
   8   0   0    18585.56    18172.72    283.20 o 
  10   0   0    62189.35    61167.02    728.79 o 
  12   0   0    34060.11    32836.26    506.89 o 
  14   0   0     8996.42     8789.04    291.39 o 
  16   0   0    29590.06    28689.96    854.62 o 
  18   0   0    26265.98    25869.96    757.09 o 
  20   0   0    12464.81    12544.28    610.98 o 
  22   0   0    12482.32    12273.98    618.42 o 
   2   1   0     1869.22     2218.33     47.72 o 
   3   1   0    10127.88    10704.78    133.99 o 
   4   1   0     8788.71     8731.93    113.65 o 
   5   1   0     5951.59     6173.84     93.28 o 
   6   1   0      791.79      609.46     51.89 o 
   7   1   0      103.93      191.91     56.50 o 
   8   1   0      360.24      411.70     70.14 o 
   9   1   0     1665.38     1855.22     88.34 o 
  10   1   0       28.66      -65.41     65.41 o 
  11   1   0      124.24       25.78     68.49 o 
  12   1   0      876.61     1074.22    103.23 o 
  13   1   0     1148.87     1074.47    100.25 o 
  14   1   0     1947.01     2075.83    147.35 o 
  15   1   0      166.97       58.11    112.24 o 
  16   1   0      795.44      782.72    181.13 o 
  17   1   0      313.16      345.03    141.60 o 
  18   1   0     1656.70     1600.11    181.36 o 
  19   1   0        1.72      -36.41    189.41 o 
  20   1   0     1079.10     1457.02    263.64 o 
  21   1   0      213.39      340.93    216.85 o 
  22   1   0      223.90      717.13    293.50 o 
   0   2   0    20580.76    21978.18    381.78 o 
   1   2   0   140839.72   149687.09   1348.72 o 
   2   2   0     3948.19     3805.80     57.58 o 
   3   2   0     2633.65     3064.22     98.55 o 
   4   2   0     8377.09     8770.62    110.79 o 
   5   2   0   114040.73   116355.76    929.69 o 
   6   2   0       21.57       32.44     48.92 o 
   7   2   0    20278.68    19020.21    215.83 o 
   8   2   0       12.94      -21.51     68.83 o 
   9   2   0    40168.73    39087.90    366.32 o 
  10   2   0      107.48       52.86     69.59 o 
  11   2   0    45917.94    45240.95    471.72 o 
  12   2   0     1484.23     1834.48    101.22 o 
  13   2   0    24654.09    23486.46    297.66 o 
  14   2   0     2402.19     2374.54    141.02 o 
  15   2   0    22563.76    22626.04    344.25 o 
  16   2   0        7.86     -122.49    122.49 o 
  17   2   0    20888.69    20328.03    363.95 o 
  18   2   0       30.74      -30.74    139.02 o 
  19   2   0    11709.24    11604.12    297.09 o 
  20   2   0      422.06      173.22    197.15 o 
  21   2   0    14575.26    15155.90    444.20 o 
  22   2   0       13.95      -49.56    225.82 o 
   1   3   0    64605.57    68617.52    527.63 o 
   2   3   0    26836.83    27178.11    236.66 o 
   3   3   0     3257.58     3289.38     69.06 o 
   4   3   0     5885.93     5948.09     79.62 o 
   5   3   0     1501.07     1978.84     58.97 o 
   6   3   0     2412.84     2130.24     87.41 o 
   7   3   0     3785.81     3707.06     91.48 o 
   8   3   0      268.32      411.16     58.30 o 
   9   3   0      260.24      316.71     63.73 o 
  10   3   0     1709.08     1996.39    115.98 o 
  11   3   0     1169.73     1595.92     94.00 o 
  12   3   0     1705.47     2126.58    145.74 o 
  13   3   0      530.12      644.63    108.93 o 
  14   3   0     1053.88     1033.20    128.23 o 
  15   3   0      417.26      296.12    123.00 o 
  16   3   0      377.42      436.08    129.13 o 
  17   3   0      986.86     1181.84    157.05 o 
  18   3   0      354.87      464.34    157.12 o 
  19   3   0       55.70      -50.14    156.94 o 
  20   3   0       22.71       -7.68    161.28 o 
  21   3   0        8.14     -182.77    182.77 o 
  22   3   0       59.27      396.49    251.76 o 
   0   4   0    39209.76    38781.22    509.44 o 
   1   4   0    15747.95    16816.51    160.82 o 
   2   4   0    37153.91    37332.03    297.58 o 
   3   4   0    23193.60    23684.54    233.69 o 
   4   4   0    42900.23    42864.94    392.32 o 
   5   4   0     5822.64     7045.17    121.93 o 
   6   4   0    65598.38    64818.54    510.01 o 
   7   4   0      521.29      422.15     61.73 o 
   8   4   0    15719.82    14467.73    168.94 o 
   9   4   0      110.85       94.21     56.21 o 
  10   4   0    36506.05    35637.95    389.13 o 
  11   4   0     1403.44     1243.87    102.44 o 
  12   4   0    36933.02    35430.89    407.68 o 
  13   4   0     6263.51     6081.21    197.09 o 
  14   4   0    30206.86    29506.84    421.55 o 
  15   4   0     1870.69     1668.66    150.83 o 
  16   4   0    17027.96    17408.84    327.50 o 
  17   4   0      174.12      -30.38    134.12 o 
  18   4   0    11538.36    11860.53    314.78 o 
  19   4   0     1084.53      884.62    209.85 o 
  20   4   0     8928.94     9728.91    311.42 o 
  21   4   0      705.88      310.37    189.09 o 
  22   4   0     5599.55     6904.29    337.85 o 
   1   5   0     5765.76     6054.81    106.46 o 
   2   5   0     7292.77     8127.22    105.24 o 
   3   5   0       70.20      188.85     49.62 o 
   4   5   0     3674.69     3692.68    123.20 o 
   5   5   0       97.83       90.64     62.88 o 
   6   5   0      609.27      987.36     72.11 o 
   7   5   0      594.21      640.13     72.13 o 
   8   5   0     1935.30     1629.77     79.54 o 
   9   5   0      276.39      451.73     69.96 o 
  10   5   0        0.15      -69.00     69.00 o 
  11   5   0     3809.44     4317.00    146.23 o 
  12   5   0        1.76      -34.90     92.22 o 
  13   5   0      108.90      352.20    106.99 o 
  14   5   0      413.44      361.97    118.74 o 
  15   5   0     2033.20     2047.44    158.35 o 
  16   5   0      643.17      416.11    135.12 o 
  17   5   0      703.28      575.13    143.63 o 
  18   5   0      272.67       -4.22    137.37 o 
  19   5   0      197.42       57.63    196.23 o 
  20   5   0       55.40     -137.92    171.31 o 
  21   5   0        7.43       -8.20    175.73 o 
   0   6   0     3809.61     4983.72    136.02 o 
   1   6   0    47685.62    45956.14    446.10 o 
   2   6   0     6229.94     6263.03    108.68 o 
   3   6   0    30166.91    28373.82    268.08 o 
   4   6   0     3668.46     4118.27    103.09 o 
   5   6   0    32559.83    30741.71    316.30 o 
   6   6   0       75.88      138.98     74.02 o 
   7   6   0    45309.76    43834.68    489.03 o 
   8   6   0     6520.48     6066.68    158.39 o 
   9   6   0    31853.80    31470.17    399.28 o 
  10   6   0     2701.57     2633.06    143.28 o 
  11   6   0    30523.68    30151.50    477.34 o 
  12   6   0     7127.42     6702.11    180.30 o 
  13   6   0    18204.24    18676.70    291.48 o 
  14   6   0      790.33      668.75    119.04 o 
  15   6   0    21124.26    22207.47    359.97 o 
  16   6   0     1538.85     1234.17    143.37 o 
  17   6   0    24234.57    25379.99    409.46 o 
  18   6   0     2141.23     1835.32    181.93 o 
  19   6   0    16183.78    16807.86    344.88 o 
  20   6   0     1042.46      469.75    171.23 o 
  21   6   0     7135.43     7640.00    363.94 o 
   1   7   0      131.08      142.32     61.74 o 
   2   7   0      361.32      737.09     63.93 o 
   3   7   0     1304.38     1167.18     65.64 o 
   4   7   0       16.72      156.42     55.74 o 
   5   7   0     2460.38     2299.93     94.26 o 
   6   7   0     1442.38     2179.36    127.11 o 
   7   7   0       87.81       62.82     82.02 o 
   8   7   0      394.86      562.51    101.08 o 
   9   7   0     1727.84     1598.26    123.05 o 
  10   7   0     4383.67     4635.84    171.48 o 
  11   7   0     1289.13     1363.31    130.21 o 
  12   7   0       90.61      304.58    120.26 o 
  13   7   0      485.19      389.78    136.35 o 
  14   7   0      726.61      476.81    148.29 o 
  15   7   0       36.33      -49.18    145.53 o 
  16   7   0       63.35      109.83    165.48 o 
  17   7   0       61.70      -97.20    170.13 o 
  18   7   0       12.95     -178.50    178.50 o 
  19   7   0       88.10        2.44    192.77 o 
  20   7   0       93.50      -11.36    237.50 o 
   0   8   0    26653.71    25014.90    417.48 o 
   1   8   0     6309.80     7034.05    142.69 o 
   2   8   0    23376.94    21804.89    289.30 o 
   3   8   0      506.17      470.67     85.16 o 
   4   8   0    29478.22    27606.40    408.93 o 
   5   8   0     1157.04     1384.22     95.66 o 
   6   8   0    22916.38    21220.50    333.43 o 
   7   8   0     4736.86     4761.66    172.13 o 
   8   8   0    18341.13    18090.62    305.26 o 
   9   8   0    11232.98    11050.20    243.90 o 
  10   8   0     9505.69     9716.96    239.25 o 
  11   8   0     6582.51     6233.90    217.55 o 
  12   8   0    13672.29    13555.44    297.35 o 
  13   8   0     3857.08     3914.16    206.42 o 
  14   8   0    10647.99    11102.85    288.21 o 
  15   8   0      390.51       -1.31    152.48 o 
  16   8   0     6713.12     7501.75    303.25 o 
  17   8   0     7587.39     6893.26    453.00 o 
  18   8   0     8930.62     9812.92    371.18 o 
  19   8   0     2728.87     2559.46    267.14 o 
   1   9   0     1020.21     1377.13    117.13 o 
   2   9   0     1997.09     2197.56    137.27 o 
   3   9   0      148.71      417.37    128.65 o 
   4   9   0      185.39      149.58    125.96 o 
   5   9   0       32.97      154.43    106.89 o 
   6   9   0       82.31      -37.26    126.48 o 
   7   9   0      587.66      611.27    128.00 o 
   8   9   0       92.60     -119.40    119.40 o 
   9   9   0      518.06      450.23    126.75 o 
  10   9   0      364.83      462.52    134.30 o 
  11   9   0        1.57     -111.59    131.27 o 
  12   9   0      204.74      186.61    145.49 o 
  13   9   0      160.68        4.76    150.77 o 
  14   9   0      270.61      200.14    163.54 o 
  15   9   0      184.80        1.64    166.23 o 
  16   9   0       46.90      -46.46    181.66 o 
  17   9   0      178.31       28.31    196.30 o 
  18   9   0       47.25     -143.35    208.51 o 
   0  10   0     4482.39     5050.43    255.44 o 
   1  10   0    19774.43    18411.32    328.65 o 
   2  10   0    13120.55    13269.24    306.51 o 
   3  10   0    19642.50    19457.09    399.64 o 
   4  10   0    12676.84    13176.46    325.64 o 
   5  10   0    22002.93    21968.54    443.98 o 
   6  10   0     8570.15     9543.70    302.28 o 
   7  10   0    15928.73    15520.02    316.72 o 
   8  10   0     6294.31     6192.25    223.95 o 
   9  10   0    15597.65    16344.60    351.97 o 
  10  10   0     3190.16     3324.83    315.11 o 
  11  10   0     5299.34     6147.45    253.81 o 
  12  10   0     3698.55     3024.07    217.48 o 
  13  10   0    13223.92    14041.34    513.39 o 
  14  10   0     2192.98     1957.16    211.77 o 
  15  10   0     2700.62     2861.85    239.10 o 
  16  10   0     2534.03     1977.56    257.73 o 
  17  10   0     6654.35     7773.00    411.49 o 
   1  11   0       83.73       97.29    124.51 o 
   2  11   0      468.44      447.50    142.02 o 
   3  11   0       54.65     -132.20    132.20 o 
   4  11   0     1453.35     1909.10    186.76 o 
   5  11   0       27.48      -11.93    155.43 o 
   6  11   0      363.59      306.64    187.76 o 
   7  11   0     1978.44     1448.53    193.31 o 
   8  11   0      699.97      738.87    178.04 o 
   9  11   0      263.44       26.04    135.91 o 
  10  11   0      846.19      961.57    180.98 o 
  11  11   0        7.92      -32.96    165.08 o 
  12  11   0       38.58        3.15    161.94 o 
  13  11   0       60.65      -70.46    165.91 o 
  14  11   0      264.42      101.35    184.60 o 
  15  11   0        9.20     -186.87    186.87 o 
   0  12   0    18549.96    18440.85    537.95 o 
   1  12   0     2110.70     2208.36    183.96 o 
   2  12   0    15177.31    15223.05    370.97 o 
   3  12   0     3676.12     3599.38    213.42 o 
   4  12   0     6635.78     6607.56    253.80 o 
   5  12   0     6724.82     6836.54    276.20 o 
   6  12   0     5111.10     5471.31    273.85 o 
   7  12   0     7770.99     7595.82    304.42 o 
   8  12   0    11332.02    12526.68    372.59 o 
   9  12   0     3332.75     3001.64    311.45 o 
  10  12   0     7570.02     8699.57    366.48 o 
  11  12   0     1794.44     1341.12    192.65 o 
  12  12   0     8381.48     9246.11    312.30 o 
  13  12   0     2413.41     1980.54    213.14 o 
  14  12   0     3385.23     3818.82    260.04 o 
   1  13   0      175.15      296.29    154.76 o 
   2  13   0      359.83       37.57    169.15 o 
   3  13   0       37.20     -128.66    157.66 o 
   4  13   0      126.52      128.64    169.98 o 
   5  13   0     1926.61     2127.22    203.36 o 
   6  13   0      510.83      232.39    189.90 o 
   7  13   0      304.31      167.50    186.64 o 
   8  13   0       13.25     -102.34    186.05 o 
   9  13   0      454.33      105.83    250.92 o 
  10  13   0        0.29        2.08    205.47 o 
  11  13   0       60.34      -80.31    272.57 o 
  12  13   0      171.71       87.39    228.59 o 
   0  14   0     9094.90     9425.12    440.46 o 
   1  14   0     2084.44     1982.35    216.87 o 
   2  14   0     4666.14     4914.63    271.33 o 
   3  14   0     3856.39     4273.27    264.94 o 
   4  14   0     5111.10     5464.67    289.22 o 
   5  14   0     2341.15     2063.67    231.43 o 
   6  14   0     5040.99     5020.76    292.43 o 
   7  14   0     4594.07     5447.79    305.29 o 
   8  14   0     3882.27     3767.32    489.50 o 
   9  14   0     2590.24     2895.21    274.65 o 
   1  15   0      191.75      235.77    206.02 o 
   2  15   0        0.45     -188.92    188.92 o 
   3  15   0       79.65     -155.75    191.50 o 
   4  15   0      189.39      357.23    211.14 o 
   5  15   0       16.91     -388.82    388.82 o 
 -23   0   1      255.72      314.77    319.33 o 
 -21   0   1      569.53      613.31    318.60 o 
 -19   0   1      204.73      312.48    377.77 o 
 -17   0   1      206.55      -44.86    172.17 o 
 -15   0   1     1004.23     1047.96    174.47 o 
 -13   0   1     3437.03     3919.20    190.54 o 
 -11   0   1      564.11      369.04    104.56 o 
  -9   0   1     8574.12     9854.20    209.71 o 
  -7   0   1     7411.31     7743.95    160.38 o 
  -5   0   1      369.94      273.14     54.12 o 
  -3   0   1      908.80      997.93     57.77 o 
   3   0   1      437.13      514.80     63.22 o 
   5   0   1    11021.64    11036.95    187.07 o 
   7   0   1     2775.28     3442.43    125.83 o 
   9   0   1     1775.55     1684.52    122.06 o 
  11   0   1     3750.39     4821.41    220.02 o 
  13   0   1      135.41      459.97    146.17 o 
  15   0   1     1186.98     1240.25    189.64 o 
  17   0   1      225.29      689.64    195.33 o 
  19   0   1        6.43      115.23    260.37 o 
  21   0   1      148.06      178.62    311.65 o 
 -23   1   1     2263.98     1827.71    267.60 o 
 -22   1   1     4658.53     4623.00    304.35 o 
 -21   1   1     7049.61     6748.89    333.29 o 
 -20   1   1     5464.13     5570.60    308.01 o 
 -19   1   1     6340.14     6786.29    319.59 o 
 -18   1   1     7500.71     8128.50    275.65 o 
 -17   1   1     8233.94     7970.18    244.08 o 
 -16   1   1     5734.21     5748.76    212.05 o 
 -15   1   1     8401.85     7925.87    196.95 o 
 -14   1   1    30781.69    31038.16    401.95 o 
 -13   1   1    12446.24    11830.95    191.07 o 
 -12   1   1    14636.83    14338.73    204.03 o 
 -11   1   1     4880.48     4754.13    118.13 o 
 -10   1   1    29345.97    29231.45    278.98 o 
  -9   1   1    35718.28    35940.27    329.28 o 
  -8   1   1    25295.87    25535.27    250.09 o 
  -7   1   1    30869.35    30604.09    273.90 o 
  -6   1   1     9562.93     9746.70    132.28 o 
  -5   1   1    73792.65    75518.05    592.67 o 
  -4   1   1    64168.74    66926.76    570.41 o 
  -3   1   1    88223.03    90490.25    783.27 o 
  -2   1   1    85308.07    85965.05    779.95 o 
   1   1   1   136469.41   147717.86   3006.98 o 
   2   1   1    69639.40    73209.23    792.58 o 
   3   1   1    41612.46    44462.41    369.43 o 
   4   1   1     8731.81     8959.72    110.44 o 
   5   1   1    16164.59    16036.52    170.42 o 
   6   1   1    20325.28    20936.33    217.96 o 
   7   1   1    53066.44    52560.55    449.05 o 
   8   1   1    25465.87    24311.55    253.50 o 
   9   1   1    18422.19    17872.50    212.41 o 
  10   1   1    14596.60    14199.13    212.67 o 
  11   1   1    15253.47    14680.25    210.51 o 
  12   1   1    22717.10    21873.78    290.03 o 
  13   1   1     4450.85     4328.52    152.77 o 
  14   1   1     8424.39     8198.22    207.29 o 
  15   1   1     1559.56     1486.58    140.54 o 
  16   1   1    17595.91    17470.04    326.13 o 
  17   1   1    15142.63    14713.62    306.50 o 
  18   1   1     4002.71     4282.25    224.25 o 
  19   1   1     7018.07     7261.46    327.35 o 
  20   1   1     4949.35     4757.10    296.14 o 
  21   1   1     7289.88     7727.03    354.98 o 
  22   1   1     2051.50     2471.29    403.91 o 
 -22   2   1      788.87      929.74    237.07 o 
 -21   2   1      364.72      284.51    290.32 o 
 -20   2   1     1251.92     1610.70    230.46 o 
 -19   2   1      464.42      244.85    162.39 o 
 -18   2   1      496.95      479.64    148.69 o 
 -17   2   1      329.07       31.87    141.47 o 
 -16   2   1     1263.39     1232.49    146.80 o 
 -15   2   1       89.63      141.04    114.44 o 
 -14   2   1      239.02       30.52    103.98 o 
 -13   2   1      588.47      515.69     96.82 o 
 -12   2   1      108.73      145.69     77.19 o 
 -11   2   1      124.63       46.32     70.45 o 
 -10   2   1      130.49      396.60     68.08 o 
  -9   2   1       77.03       -1.28     62.15 o 
  -8   2   1     1452.41     1337.15     80.92 o 
  -7   2   1      266.27      243.78     60.39 o 
  -6   2   1    13916.77    13564.69    151.91 o 
  -5   2   1     9645.59     9789.44    146.15 o 
  -4   2   1    19760.95    18694.67    200.61 o 
  -3   2   1     4187.27     4264.33     97.02 o 
  -2   2   1      605.37      721.19     41.70 o 
  -1   2   1      845.26     1063.38     61.03 o 
   0   2   1     1200.75     1715.39     77.66 o 
   1   2   1     1400.47     1487.87     52.73 o 
   2   2   1      180.71      323.03     33.45 o 
   3   2   1    21563.17    23261.63    217.40 o 
   4   2   1      724.71      608.22     39.01 o 
   5   2   1     9613.26    10324.62    128.83 o 
   6   2   1     6650.34     7478.20    119.59 o 
   7   2   1     3076.64     3821.93    105.06 o 
   8   2   1      879.61     1285.84     82.96 o 
   9   2   1      694.00      858.07     80.03 o 
  10   2   1     1236.77     1490.16     90.89 o 
  11   2   1     1184.00     1258.01     92.87 o 
  12   2   1      108.40      139.76     84.35 o 
  13   2   1      544.69      365.64    100.83 o 
  14   2   1       78.34       14.58    106.18 o 
  15   2   1      409.94      281.42    127.17 o 
  16   2   1      562.81      694.92    142.15 o 
  17   2   1       59.17     -129.60    129.60 o 
  18   2   1      230.77     -101.06    142.21 o 
  19   2   1        0.20        4.12    147.27 o 
  20   2   1      252.70      345.97    188.70 o 
  21   2   1       21.66      166.25    220.57 o 
  22   2   1        1.94      -76.85    215.34 o 
 -22   3   1     4064.91     3936.85    324.61 o 
 -21   3   1     3467.66     3685.65    258.46 o 
 -20   3   1     9311.66     9489.37    316.89 o 
 -19   3   1     9063.31     9730.53    307.17 o 
 -18   3   1     3767.83     3703.17    218.87 o 
 -17   3   1     2792.42     3077.63    183.52 o 
 -16   3   1    15516.94    14168.90    278.38 o 
 -15   3   1     8203.60     8849.44    228.10 o 
 -14   3   1    12473.04    11847.57    239.90 o 
 -13   3   1    15785.24    15801.09    252.44 o 
 -12   3   1    22756.48    22436.57    297.27 o 
 -11   3   1     8582.39     8326.34    163.65 o 
 -10   3   1    14053.92    13510.83    183.22 o 
  -9   3   1    12759.13    11627.17    163.88 o 
  -8   3   1    74456.59    75458.69    623.34 o 
  -7   3   1    10372.44     9836.06    132.24 o 
  -6   3   1    19942.31    19327.92    269.11 o 
  -5   3   1    23738.66    23797.26    254.54 o 
  -4   3   1   130716.21   134443.38   1163.37 o 
  -3   3   1    26432.71    27053.89    272.13 o 
  -2   3   1    13012.96    12794.36    129.54 o 
  -1   3   1     5375.11     5208.23     69.70 o 
   0   3   1     2332.62     2565.45     64.39 o 
   1   3   1     2035.38     2025.53     75.09 o 
   2   3   1    21691.25    22957.09    249.31 o 
   3   3   1     2156.16     2029.97     56.98 o 
   4   3   1    20282.97    20667.48    217.43 o 
   5   3   1    32529.69    33416.88    302.79 o 
   6   3   1    65482.22    67981.32    594.76 o 
   7   3   1    36758.63    35702.42    343.14 o 
   8   3   1    29958.35    31038.83    316.43 o 
   9   3   1     7864.68     7297.19    149.03 o 
  10   3   1    30448.58    30064.81    324.55 o 
  11   3   1    16786.58    16560.35    227.60 o 
  12   3   1    19550.91    19031.46    273.61 o 
  13   3   1    13430.93    13297.46    247.59 o 
  14   3   1    20819.07    19549.18    340.51 o 
  15   3   1     9433.64     9650.84    236.10 o 
  16   3   1     6742.32     6760.67    235.68 o 
  17   3   1     5294.80     5980.89    231.21 o 
  18   3   1    12626.51    12274.90    295.89 o 
  19   3   1     3609.06     3614.05    226.36 o 
  20   3   1     4743.59     4156.69    240.08 o 
  21   3   1     2220.87     2405.37    241.64 o 
  22   3   1    10216.60    10237.51    484.04 o 
 -22   4   1      217.46      290.70    205.06 o 
 -21   4   1      329.09       22.60    173.05 o 
 -20   4   1      170.69     -135.16    167.61 o 
 -19   4   1      272.50      393.01    174.51 o 
 -18   4   1      121.58       18.68    138.52 o 
 -17   4   1      179.75      316.54    138.45 o 
 -16   4   1      687.82      525.20    136.31 o 
 -15   4   1     2400.90     2535.99    167.09 o 
 -14   4   1      495.45      500.30    117.37 o 
 -13   4   1     7968.84     8333.32    201.60 o 
 -12   4   1       38.37      106.24     94.17 o 
 -11   4   1     4872.73     4802.37    143.29 o 
 -10   4   1     4552.10     5588.16    194.18 o 
  -9   4   1    20264.66    18941.34    340.01 o 
  -8   4   1      335.62      132.93     54.89 o 
  -7   4   1     1940.09     2049.08     82.14 o 
  -6   4   1      683.23     1125.05     77.88 o 
  -5   4   1     1086.58     1675.79     60.60 o 
  -4   4   1     2476.78     2624.57     82.18 o 
  -3   4   1     2370.07     2764.24     81.51 o 
  -2   4   1     2426.35     2714.10     85.11 o 
  -1   4   1      831.86      860.42     34.42 o 
   0   4   1      109.39      132.64     28.24 o 
   1   4   1    12248.52    12290.11    140.40 o 
   2   4   1      591.60      569.74     49.60 o 
   3   4   1      334.01      689.61     47.06 o 
   4   4   1    17572.12    18504.30    203.40 o 
   5   4   1     1167.09     1543.70     76.47 o 
   6   4   1     3582.13     3574.65    100.35 o 
   7   4   1     2383.52     3258.38     81.38 o 
   8   4   1     6610.08     7087.20    132.11 o 
   9   4   1      236.79      314.66     61.52 o 
  10   4   1     2396.60     3400.40    123.36 o 
  11   4   1       14.97      252.64     89.19 o 
  12   4   1      235.49      172.42     98.15 o 
  13   4   1      806.27     1066.37    121.86 o 
  14   4   1      626.43      457.02    129.11 o 
  15   4   1        2.40       -8.00    125.67 o 
  16   4   1      425.32      345.12    134.18 o 
  17   4   1      322.06      142.27    135.75 o 
  18   4   1      146.27     -150.21    150.21 o 
  19   4   1      716.51      283.10    167.99 o 
  20   4   1      128.90     -170.91    170.91 o 
  21   4   1       12.28     -131.87    179.52 o 
 -21   5   1     6509.13     6451.99    303.23 o 
 -20   5   1     2488.00     2553.01    200.99 o 
 -19   5   1     7352.22     7224.98    255.84 o 
 -18   5   1     2802.68     3318.86    197.27 o 
 -17   5   1    10151.96    10246.45    268.97 o 
 -16   5   1     6348.22     7331.68    235.20 o 
 -15   5   1    16249.59    15082.71    295.00 o 
 -14   5   1     3765.10     3984.58    213.70 o 
 -13   5   1    17634.62    16800.33    292.17 o 
 -12   5   1     9608.12     9284.63    200.03 o 
 -11   5   1    24861.44    23895.07    318.49 o 
 -10   5   1     6101.52     5994.64    157.96 o 
  -9   5   1    38736.78    38783.44    423.49 o 
  -8   5   1    16460.84    16051.24    203.27 o 
  -7   5   1    34270.92    33025.75    292.68 o 
  -6   5   1      450.06      383.01     64.34 o 
  -5   5   1    35069.17    35629.59    330.33 o 
  -4   5   1    16113.20    16091.15    184.72 o 
  -3   5   1    69836.59    73009.84    658.42 o 
  -2   5   1      278.63      179.25     50.22 o 
  -1   5   1    26793.04    26304.25    258.45 o 
   0   5   1    15804.30    14618.46    152.56 o 
   1   5   1    51285.38    52423.75    516.16 o 
   2   5   1    20668.16    18653.13    177.19 o 
   3   5   1    17496.57    16711.55    172.75 o 
   4   5   1     3906.61     3626.74    114.72 o 
   5   5   1    70526.96    72202.55    640.38 o 
   6   5   1    32516.22    32722.29    321.04 o 
   7   5   1    34879.17    34841.35    344.16 o 
   8   5   1     5198.66     4831.06    161.93 o 
   9   5   1    24904.39    24396.18    279.65 o 
  10   5   1    12578.30    12728.33    191.21 o 
  11   5   1    29206.98    27552.89    351.52 o 
  12   5   1     8024.78     8095.98    195.23 o 
  13   5   1    29647.04    27973.26    376.73 o 
  14   5   1     8428.84     9793.19    237.47 o 
  15   5   1    15939.38    15361.16    297.53 o 
  16   5   1     3414.41     4249.07    267.37 o 
  17   5   1    10061.57    10371.53    269.16 o 
  18   5   1     5659.28     6750.60    244.26 o 
  19   5   1     6442.32     6471.85    268.74 o 
  20   5   1      906.81     1045.65    186.35 o 
  21   5   1     3385.06     3178.63    235.56 o 
 -21   6   1        1.79     -181.96    181.96 o 
 -20   6   1      218.21      100.21    174.16 o 
 -19   6   1      356.27      347.73    163.32 o 
 -18   6   1      140.47      172.54    144.31 o 
 -17   6   1      185.51      218.65    136.84 o 
 -16   6   1      280.07       87.34    130.45 o 
 -15   6   1      395.99      316.76    121.91 o 
 -14   6   1      640.49      707.27    155.46 o 
 -13   6   1      567.99      219.93    103.88 o 
 -12   6   1      145.00      124.17     95.90 o 
 -11   6   1      638.22      503.59     93.04 o 
 -10   6   1     3298.27     3042.78    102.58 o 
  -9   6   1      174.16       89.23     88.34 o 
  -8   6   1     1175.25     1271.79    113.27 o 
  -7   6   1     3714.63     3599.62    126.55 o 
  -6   6   1      320.96      184.57     61.13 o 
  -5   6   1        5.70      -10.72     55.25 o 
  -4   6   1    11488.32    11322.02    157.95 o 
  -3   6   1     1027.22     1039.88     55.29 o 
  -2   6   1      419.00      709.38     59.82 o 
  -1   6   1      238.63      324.45     56.65 o 
   0   6   1     1560.94     1587.28     67.65 o 
   1   6   1     7086.83     6943.75    145.25 o 
   2   6   1        6.98      197.81     48.34 o 
   3   6   1     1432.65     1385.19     89.96 o 
   4   6   1     1535.11     1917.74     81.75 o 
   5   6   1     4449.89     4452.55    144.95 o 
   6   6   1      262.87      509.70    100.58 o 
   7   6   1      544.36      849.32     90.77 o 
   8   6   1     1210.80     1446.16    105.58 o 
   9   6   1     2540.18     2936.86    135.49 o 
  10   6   1      650.45      834.63    127.85 o 
  11   6   1        2.53      -48.79    117.49 o 
  12   6   1     2677.77     2788.40    158.91 o 
  13   6   1      328.57      197.00     95.52 o 
  14   6   1     1154.81      839.19    120.22 o 
  15   6   1      474.68      353.60    144.87 o 
  16   6   1       72.19      -74.35    121.29 o 
  17   6   1        2.16      -91.46    131.58 o 
  18   6   1      203.96        6.83    139.49 o 
  19   6   1      274.27       -3.21    149.97 o 
  20   6   1      222.67      195.05    159.01 o 
 -20   7   1    11369.55    10409.15    446.44 o 
 -19   7   1      955.99     1620.55    279.89 o 
 -18   7   1    17881.23    17189.86    447.48 o 
 -17   7   1     1355.19     1696.85    218.36 o 
 -16   7   1    14684.81    14433.69    362.56 o 
 -15   7   1      980.83     1306.09    165.49 o 
 -14   7   1    19668.03    18982.54    366.53 o 
 -13   7   1     4513.39     4841.67    212.22 o 
 -12   7   1    10925.31    10463.53    257.76 o 
 -11   7   1     4370.03     4679.04    192.14 o 
 -10   7   1    31258.63    29784.26    428.43 o 
  -9   7   1     4204.50     4208.53    158.12 o 
  -8   7   1    11701.67    11445.72    211.61 o 
  -7   7   1     7363.40     6574.70    166.77 o 
  -6   7   1    25188.54    24959.66    309.02 o 
  -5   7   1     4451.17     4335.40    116.13 o 
  -4   7   1    14847.47    14539.91    175.71 o 
  -3   7   1     9750.96     7846.48    133.04 o 
  -2   7   1    19444.76    18517.46    224.68 o 
  -1   7   1     1915.66     1241.00     73.99 o 
   0   7   1    43870.76    43376.81    415.97 o 
   1   7   1    24706.21    22300.41    255.88 o 
   2   7   1    12759.27    12287.03    153.80 o 
   3   7   1    11147.38     9824.59    129.91 o 
   4   7   1    27823.75    26064.15    265.33 o 
   5   7   1    17229.91    16276.10    217.79 o 
   6   7   1    35130.06    34441.40    406.44 o 
   7   7   1     2439.47     2328.07    119.61 o 
   8   7   1    20282.59    19706.35    293.44 o 
   9   7   1     1574.84     1819.28    142.97 o 
  10   7   1    22213.85    22152.67    334.40 o 
  11   7   1     1707.08     2067.61    146.18 o 
  12   7   1    32537.49    31717.90    442.62 o 
  13   7   1     5068.63     5907.04    214.15 o 
  14   7   1    13942.67    13237.32    287.39 o 
  15   7   1     1606.82     1659.78    189.05 o 
  16   7   1    17168.84    16845.04    391.08 o 
  17   7   1     1815.72     2500.36    220.74 o 
  18   7   1    11695.03    11802.57    371.03 o 
  19   7   1     1971.28     2535.78    324.93 o 
  20   7   1     5391.91     5407.50    398.91 o 
 -19   8   1      281.64      536.61    213.06 o 
 -18   8   1        2.46       71.68    195.80 o 
 -17   8   1      709.50      553.69    194.68 o 
 -16   8   1       15.36       58.18    173.27 o 
 -15   8   1      256.19      287.51    163.51 o 
 -14   8   1       29.17      -93.85    147.41 o 
 -13   8   1      958.78      861.16    219.21 o 
 -12   8   1      271.28      289.28    142.86 o 
 -11   8   1     1393.47     1554.98    157.44 o 
 -10   8   1      201.21       40.92    126.90 o 
  -9   8   1       80.39     -108.58    108.58 o 
  -8   8   1     1075.50     1100.98    128.49 o 
  -7   8   1      265.79      318.91    105.96 o 
  -6   8   1     6269.28     5993.23    198.18 o 
  -5   8   1     1704.10     1610.69    101.80 o 
  -4   8   1      138.33      317.72     98.65 o 
  -3   8   1     1293.87     1431.75    111.41 o 
  -2   8   1     3832.43     4148.25    136.09 o 
  -1   8   1      856.55      831.92     79.39 o 
   0   8   1     7517.00     7119.49    141.40 o 
   1   8   1     3568.46     3758.41    114.85 o 
   2   8   1      295.04      263.54     62.51 o 
   3   8   1      630.54      429.03     66.48 o 
   4   8   1     1086.83      911.76     85.04 o 
   5   8   1      564.85      498.96     92.81 o 
   6   8   1       69.85       10.66     90.02 o 
   7   8   1      544.31      611.18    113.43 o 
   8   8   1      122.80      160.63    105.55 o 
   9   8   1      640.86      616.13    124.97 o 
  10   8   1      220.16      -26.76    114.07 o 
  11   8   1      276.37      -39.06    123.86 o 
  12   8   1       57.31       13.33    123.64 o 
  13   8   1      324.74      301.11    146.49 o 
  14   8   1     1902.11     1342.06    165.34 o 
  15   8   1        5.20     -147.51    147.51 o 
  16   8   1      758.13      670.29    181.25 o 
  17   8   1       80.40       68.24    184.32 o 
  18   8   1       87.61     -138.59    187.87 o 
  19   8   1        7.02     -143.73    217.19 o 
 -18   9   1      178.18      447.13    212.74 o 
 -17   9   1     5620.31     5726.52    307.90 o 
 -16   9   1      398.32      645.81    180.59 o 
 -15   9   1    12442.89    12485.80    494.97 o 
 -14   9   1      679.12      857.29    170.92 o 
 -13   9   1    10743.43    10498.19    297.59 o 
 -12   9   1     1538.20     1734.00    171.83 o 
 -11   9   1    19830.29    19171.57    366.61 o 
 -10   9   1      390.45      317.09    126.76 o 
  -9   9   1    14143.02    14156.53    293.26 o 
  -8   9   1     2021.24     1979.74    146.31 o 
  -7   9   1    15222.62    15562.58    287.29 o 
  -6   9   1     1586.95     1548.21    117.37 o 
  -5   9   1    28854.73    27971.06    499.65 o 
  -4   9   1     2513.54     2003.83    146.24 o 
  -3   9   1    22071.20    22405.92    375.74 o 
  -2   9   1     8269.04     7396.62    181.93 o 
  -1   9   1    33880.45    33080.39    436.08 o 
   0   9   1     1297.27      779.42    108.03 o 
   1   9   1    20723.33    20036.09    309.88 o 
   2   9   1     2891.68     2303.12    138.60 o 
   3   9   1    24883.99    24812.02    447.94 o 
   4   9   1     5721.89     5283.95    142.99 o 
   5   9   1    34302.87    34546.28    510.46 o 
   6   9   1      465.16      208.76    115.69 o 
   7   9   1    13727.68    13935.76    277.16 o 
   8   9   1     1832.39     1887.59    147.00 o 
   9   9   1    12494.61    13016.99    268.47 o 
  10   9   1      348.65       65.00    134.59 o 
  11   9   1    12938.41    12616.27    284.41 o 
  12   9   1       66.32     -127.91    127.91 o 
  13   9   1     8754.10     8917.77    308.63 o 
  14   9   1      360.82      353.41    157.18 o 
  15   9   1     8674.58     9186.87    314.60 o 
  16   9   1      355.02      481.75    273.33 o 
  17   9   1     7186.77     7588.60    342.22 o 
  18   9   1      295.93       16.36    215.75 o 
 -17  10   1       35.87     -190.40    190.40 o 
 -16  10   1      535.61      251.57    176.87 o 
 -15  10   1        2.30     -210.55    210.55 o 
 -14  10   1       23.58     -115.62    158.87 o 
 -13  10   1      133.41      206.47    191.78 o 
 -12  10   1      553.26      448.36    160.74 o 
 -11  10   1      279.47      273.73    149.76 o 
 -10  10   1       52.07     -101.11    135.76 o 
  -9  10   1      219.54       -2.22    132.14 o 
  -8  10   1      862.60      601.19    132.46 o 
  -7  10   1       94.16      160.79    150.63 o 
  -6  10   1      170.95       15.11    151.94 o 
  -5  10   1       69.34       22.21    148.92 o 
  -4  10   1      993.70     1042.83    195.83 o 
  -3  10   1       91.69       43.83    133.92 o 
  -2  10   1     2067.63     2097.26    151.40 o 
  -1  10   1        4.79       23.06    114.24 o 
   0  10   1       61.21      217.31    112.42 o 
   1  10   1       34.08       84.58    113.92 o 
   2  10   1     2855.67     3158.04    200.77 o 
   3  10   1       34.94       36.69    133.30 o 
   4  10   1     1093.87      932.68    155.54 o 
   5  10   1      206.79      387.20    146.01 o 
   6  10   1     3565.52     3305.27    171.01 o 
   7  10   1       63.36      181.08    128.12 o 
   8  10   1       38.95       16.78    130.93 o 
   9  10   1     1268.83      877.79    151.27 o 
  10  10   1      235.47       40.48    143.24 o 
  11  10   1       69.65     -142.06    142.06 o 
  12  10   1      236.37      166.64    159.66 o 
  13  10   1      381.35      -33.25    217.44 o 
  14  10   1      447.72      406.66    182.11 o 
  15  10   1      596.46       28.47    188.73 o 
  16  10   1      230.64      267.71    241.84 o 
  17  10   1       20.99     -344.69    344.69 o 
 -16  11   1     7390.16     7795.39    420.30 o 
 -15  11   1       74.98      -66.13    186.02 o 
 -14  11   1     9368.45     9441.71    331.93 o 
 -13  11   1      237.76      403.09    177.30 o 
 -12  11   1    17888.90    18166.00    475.38 o 
 -11  11   1      667.96      754.52    164.64 o 
 -10  11   1    15980.40    15318.00    346.40 o 
  -9  11   1      611.18      805.68    189.43 o 
  -8  11   1    13341.99    13568.91    372.04 o 
  -7  11   1     1121.69      965.30    184.33 o 
  -6  11   1    27769.00    26506.96    523.47 o 
  -5  11   1      265.52      188.95    160.21 o 
  -4  11   1    16194.69    16587.04    383.85 o 
  -3  11   1      405.69       17.63    133.85 o 
  -2  11   1    18354.79    18316.83    346.19 o 
  -1  11   1     3690.78     3604.31    184.57 o 
   0  11   1    25853.87    25417.39    445.30 o 
   1  11   1       93.49       11.55    125.26 o 
   2  11   1     8267.72     8577.89    254.76 o 
   3  11   1      232.74       78.63    135.28 o 
   4  11   1    26401.79    26512.12    507.83 o 
   5  11   1       43.12       60.84    149.01 o 
   6  11   1    14330.71    14912.29    375.91 o 
   7  11   1      638.89      437.81    125.30 o 
   8  11   1    11320.96    11385.22    286.41 o 
   9  11   1      360.05      304.20    145.48 o 
  10  11   1    10986.89    11258.33    309.36 o 
  11  11   1      539.79      467.48    161.95 o 
  12  11   1     9567.96     9745.52    381.40 o 
  13  11   1       21.92     -160.34    160.34 o 
  14  11   1     7518.52     8325.83    504.05 o 
  15  11   1      459.24      592.30    206.36 o 
 -14  12   1       53.53     -184.16    184.16 o 
 -13  12   1       51.18      -89.00    172.86 o 
 -12  12   1       72.68     -155.27    155.27 o 
 -11  12   1      232.10      195.01    198.98 o 
 -10  12   1        1.91     -172.94    172.94 o 
  -9  12   1      196.22     -150.42    170.06 o 
  -8  12   1        1.70     -165.94    165.94 o 
  -7  12   1      189.95      369.78    196.07 o 
  -6  12   1       97.38       17.09    160.84 o 
  -5  12   1        9.61      224.07    165.72 o 
  -4  12   1      179.27     -105.42    144.50 o 
  -3  12   1       12.77      120.77    143.27 o 
  -2  12   1     1834.53     1886.48    191.15 o 
  -1  12   1      116.86       19.70    141.78 o 
   0  12   1     3005.54     3363.22    205.97 o 
   1  12   1      232.64      249.38    141.78 o 
   2  12   1      118.55      161.17    154.07 o 
   3  12   1     1201.81     1350.88    170.30 o 
   4  12   1      883.61      734.88    229.44 o 
   5  12   1      168.37       83.27    157.75 o 
   6  12   1      240.08     -157.71    157.71 o 
   7  12   1      114.05        9.06    172.90 o 
   8  12   1      902.40      631.22    188.03 o 
   9  12   1       19.01     -181.31    181.31 o 
  10  12   1      281.85      -38.24    147.21 o 
  11  12   1       52.37       30.06    161.16 o 
  12  12   1       78.64     -151.82    167.71 o 
  13  12   1      126.45       52.54    208.24 o 
 -12  13   1        3.48     -203.37    203.37 o 
 -11  13   1     7900.28     7704.15    365.85 o 
 -10  13   1      246.82     -195.81    195.81 o 
  -9  13   1     5519.43     6125.93    320.60 o 
  -8  13   1      412.80      309.82    192.43 o 
  -7  13   1    10848.22    10794.45    364.85 o 
  -6  13   1        6.76      -24.35    174.32 o 
  -5  13   1    12154.95    12401.02    339.84 o 
  -4  13   1        3.00      -48.83    168.86 o 
  -3  13   1    10883.50    11338.30    337.61 o 
  -2  13   1      680.51      526.13    173.01 o 
  -1  13   1    17307.06    17331.00    383.69 o 
   0  13   1      223.42      197.12    155.17 o 
   1  13   1    14977.51    14929.99    381.16 o 
   2  13   1        3.51     -161.68    161.68 o 
   3  13   1    11187.33    11297.37    337.10 o 
   4  13   1       65.21     -163.17    163.17 o 
   5  13   1    15491.63    15463.16    373.77 o 
   6  13   1      607.99      406.16    198.13 o 
   7  13   1     7532.18     7856.24    317.59 o 
   8  13   1       27.58     -184.29    184.29 o 
   9  13   1     8008.98     8560.58    356.19 o 
  10  13   1      390.14      348.57    210.84 o 
  11  13   1     6699.24     7403.77    459.77 o 
  -9  14   1       63.84       -6.27    210.61 o 
  -8  14   1     1375.81     1657.26    386.59 o 
  -7  14   1       13.02     -181.58    181.58 o 
  -6  14   1     2091.13     2517.00    448.43 o 
  -5  14   1      122.51     -179.08    179.08 o 
  -4  14   1      317.68      229.58    182.47 o 
  -3  14   1      159.62     -173.98    173.98 o 
  -2  14   1       35.72      -19.56    174.78 o 
  -1  14   1      298.73      282.34    181.61 o 
   0  14   1        9.70       38.29    166.38 o 
   1  14   1      590.60      338.69    181.58 o 
   2  14   1        2.25     -172.96    172.96 o 
   3  14   1       65.28      -84.02    178.89 o 
   4  14   1      587.78      217.82    190.68 o 
   5  14   1      669.26      547.78    194.73 o 
   6  14   1      681.34     1106.38    256.12 o 
   7  14   1      415.63     -108.81    193.53 o 
   8  14   1        8.28     -245.54    245.54 o 
   9  14   1       71.21     -250.32    250.32 o 
  -5  15   1        0.90     -137.43    200.11 o 
  -4  15   1     5166.21     6225.49    451.26 o 
  -3  15   1      340.91     -159.29    237.65 o 
  -2  15   1     6772.16     7285.22    490.39 o 
  -1  15   1      379.67      -61.75    270.16 o 
   0  15   1     7729.74     8648.29    402.56 o 
   1  15   1      428.17     -186.44    186.44 o 
   2  15   1     6389.59     7113.20    377.69 o 
   3  15   1      216.44      -52.69    195.00 o 
   4  15   1     6072.38     6843.90    340.77 o 
 -22   0   2     4983.08     4423.18    428.94 o 
 -20   0   2    11682.51    11189.12    531.37 o 
 -18   0   2    15951.14    15696.86    688.83 o 
 -16   0   2    16630.47    16319.78    366.43 o 
 -14   0   2    14337.13    13213.72    305.02 o 
 -12   0   2    54711.09    51200.11    603.21 o 
 -10   0   2    43281.18    41990.80    496.19 o 
  -8   0   2    30646.37    30465.90    372.39 o 
  -6   0   2   133808.83   132613.02   2136.35 o 
  -4   0   2    42625.68    43151.02    445.40 o 
   2   0   2   177013.06   193988.20   2381.47 o 
   4   0   2    46966.63    48217.07    637.68 o 
   6   0   2    50527.38    52372.57    648.90 o 
   8   0   2    26042.93    25328.59    358.07 o 
  10   0   2    40524.61    38618.96    509.33 o 
  12   0   2    29635.14    28144.88    548.19 o 
  14   0   2    10924.35    10361.55    373.56 o 
  16   0   2    11882.66    10946.74    413.18 o 
  18   0   2    22219.43    22420.99    739.15 o 
  20   0   2    17406.61    18126.84    667.28 o 
  22   0   2     9082.69    10015.85    584.10 o 
 -23   1   2      473.06      394.01    231.26 o 
 -22   1   2      551.49      451.59    219.93 o 
 -21   1   2      593.56      651.61    217.55 o 
 -20   1   2      822.80      743.62    214.45 o 
 -19   1   2      139.60     -148.58    179.17 o 
 -18   1   2      327.40      -30.91    146.78 o 
 -17   1   2      725.47      924.95    144.39 o 
 -16   1   2     1649.72     1497.97    154.18 o 
 -15   1   2      826.19      553.65    113.60 o 
 -14   1   2      242.58      404.96     91.32 o 
 -13   1   2     3531.84     3481.68    165.52 o 
 -12   1   2     2423.81     2272.87     93.25 o 
 -11   1   2     1611.20     1538.73     78.20 o 
 -10   1   2     5016.35     5537.00    110.12 o 
  -9   1   2      720.11      657.43     67.21 o 
  -8   1   2     9697.63     8996.06    123.84 o 
  -7   1   2     3226.22     2924.85     73.20 o 
  -6   1   2     4916.63     5615.75     88.24 o 
  -5   1   2     3328.52     3545.75     72.22 o 
  -4   1   2     1136.62     1513.88     59.66 o 
  -3   1   2    13996.04    13419.20    155.46 o 
  -2   1   2     1460.60     1275.45     42.18 o 
  -1   1   2    20800.58    20845.85    270.10 o 
   0   1   2    11753.63    12834.89    234.13 o 
   1   1   2    22235.84    24345.83    251.51 o 
   2   1   2    43329.12    45761.07    374.93 o 
   3   1   2    27411.03    29682.63    261.47 o 
   4   1   2     9020.86    10046.46    120.63 o 
   5   1   2     4092.97     4449.31     86.13 o 
   6   1   2     4194.88     5080.95    102.56 o 
   7   1   2     1867.49     2331.87     94.35 o 
   8   1   2      854.46     1005.44     76.86 o 
   9   1   2    12487.21    13326.91    180.51 o 
  10   1   2       30.41        5.22     69.28 o 
  11   1   2      779.68      851.26    117.88 o 
  12   1   2      128.87      236.80     91.04 o 
  13   1   2     1729.92     1718.41    125.33 o 
  14   1   2      712.29      610.18    119.79 o 
  15   1   2     1282.66      936.03    141.52 o 
  16   1   2      551.37      549.66    155.12 o 
  17   1   2      912.36      713.22    150.85 o 
  18   1   2      181.01      -50.72    157.99 o 
  19   1   2     1528.81     1556.73    226.08 o 
  20   1   2      125.11     -192.26    192.26 o 
  21   1   2      318.45      -79.29    209.33 o 
  22   1   2      273.33      105.99    227.33 o 
 -23   2   2    10911.23    11527.08    433.05 o 
 -22   2   2      488.64      346.90    220.94 o 
 -21   2   2    12239.62    12742.42    417.04 o 
 -20   2   2      237.05      387.90    200.24 o 
 -19   2   2    11639.93    10895.12    308.61 o 
 -18   2   2     1174.10      855.20    155.95 o 
 -17   2   2    13312.65    13295.35    293.33 o 
 -16   2   2     1926.97     1985.10    146.70 o 
 -15   2   2     8956.84     8714.38    225.56 o 
 -14   2   2     1171.26      896.86    116.02 o 
 -13   2   2    28393.87    26955.04    307.31 o 
 -12   2   2       72.38      -37.38     66.97 o 
 -11   2   2    57018.55    55679.18    480.38 o 
 -10   2   2      915.25      900.49     68.28 o 
  -9   2   2    49768.26    49172.99    421.19 o 
  -8   2   2    11286.18    11325.37    149.50 o 
  -7   2   2    99980.39   100711.55    794.00 o 
  -6   2   2     4207.25     4520.40     86.87 o 
  -5   2   2    65285.50    64490.62    617.32 o 
  -4   2   2    38814.29    39053.74    386.26 o 
  -3   2   2    50053.94    51236.46    486.12 o 
  -2   2   2     4555.20     4389.62     78.64 o 
  -1   2   2    32311.15    34767.81    434.19 o 
   0   2   2       14.61       18.13     36.62 o 
   1   2   2    11312.06    12091.32    151.40 o 
   2   2   2     6214.92     5936.76     90.90 o 
   3   2   2    57567.98    58801.03    480.11 o 
   4   2   2     5406.55     6112.58     84.97 o 
   5   2   2    40602.49    38827.32    349.02 o 
   6   2   2      631.13      779.33     68.90 o 
   7   2   2    41945.49    40458.94    400.10 o 
   8   2   2     1516.00     1844.15    114.21 o 
   9   2   2    63610.85    62425.25    565.02 o 
  10   2   2     3306.84     3642.96    116.79 o 
  11   2   2    36111.52    34446.24    369.94 o 
  12   2   2     3584.05     3631.48    185.01 o 
  13   2   2    20075.21    19611.90    284.60 o 
  14   2   2      357.49      422.76    135.18 o 
  15   2   2    20284.26    19687.60    366.05 o 
  16   2   2        9.53     -125.43    125.43 o 
  17   2   2    18608.18    18243.26    345.88 o 
  18   2   2      598.60      524.72    158.01 o 
  19   2   2    16241.25    17011.75    353.92 o 
  20   2   2       18.56      159.69    199.68 o 
  21   2   2    12489.61    12798.30    427.51 o 
  22   2   2      698.21      805.70    268.41 o 
 -22   3   2       63.57      522.35    248.01 o 
 -21   3   2      245.40      369.95    210.37 o 
 -20   3   2      901.09      597.54    172.44 o 
 -19   3   2      346.51      426.26    163.32 o 
 -18   3   2     1671.46     1876.87    181.66 o 
 -17   3   2     2057.89     2125.95    166.42 o 
 -16   3   2     2419.72     3062.38    175.43 o 
 -15   3   2      551.85      398.35    120.48 o 
 -14   3   2     4434.03     4897.63    168.78 o 
 -13   3   2     1001.05      914.15    107.86 o 
 -12   3   2    14731.51    14768.13    233.18 o 
 -11   3   2     9420.42     8807.41    153.26 o 
 -10   3   2      495.23      505.21     71.03 o 
  -9   3   2     6642.09     5906.60    137.35 o 
  -8   3   2    11684.65    11398.15    159.69 o 
  -7   3   2       50.52      -67.42     67.42 o 
  -6   3   2       20.99      -15.05     56.15 o 
  -5   3   2      285.24      340.91     52.18 o 
  -4   3   2     2615.28     2733.41     95.88 o 
  -3   3   2    13684.75    14941.08    160.79 o 
  -2   3   2     7504.73     7154.82     86.58 o 
  -1   3   2     3436.56     3514.43     72.06 o 
   0   3   2    13311.39    13104.95    166.58 o 
   1   3   2    25082.41    26654.00    347.93 o 
   2   3   2     2620.32     2723.71     71.21 o 
   3   3   2    27745.53    29803.02    292.15 o 
   4   3   2      365.55      638.62     51.27 o 
   5   3   2    15999.04    19165.85    216.56 o 
   6   3   2     4536.35     5380.19    116.96 o 
   7   3   2      807.17     1166.58     74.44 o 
   8   3   2     8199.94     8475.96    135.10 o 
   9   3   2      545.99      434.61     67.32 o 
  10   3   2     3066.84     3468.27    117.81 o 
  11   3   2       32.84      163.75     79.18 o 
  12   3   2      105.13      194.06    102.27 o 
  13   3   2       55.65       60.12    113.07 o 
  14   3   2      198.52      121.00    115.35 o 
  15   3   2      218.46       -2.73    118.86 o 
  16   3   2      906.26      820.22    150.87 o 
  17   3   2       90.98       82.45    140.86 o 
  18   3   2      642.54      531.66    159.03 o 
  19   3   2       30.91     -152.73    152.73 o 
  20   3   2       80.64      -88.38    159.33 o 
  21   3   2      842.04      155.36    201.73 o 
 -22   4   2    12286.06    13602.25    433.49 o 
 -21   4   2      159.75       13.73    184.34 o 
 -20   4   2     6580.28     6861.31    299.08 o 
 -19   4   2     1207.66      837.08    162.20 o 
 -18   4   2    16471.92    16906.71    338.33 o 
 -17   4   2       36.44      -26.04    131.47 o 
 -16   4   2    11706.79    11380.58    265.14 o 
 -15   4   2       72.77       49.75    119.64 o 
 -14   4   2    25521.57    25173.18    359.00 o 
 -13   4   2    10989.22    10963.12    303.36 o 
 -12   4   2    30806.08    30642.12    426.63 o 
 -11   4   2     1718.37     1808.43    118.46 o 
 -10   4   2    22901.60    22871.19    282.80 o 
  -9   4   2    14782.28    14404.13    235.50 o 
  -8   4   2    32180.72    31061.10    331.49 o 
  -7   4   2     2193.68     2673.69    133.03 o 
  -6   4   2    70046.11    69556.93    649.89 o 
  -5   4   2     3473.51     3740.28     92.34 o 
  -4   4   2    44463.73    44320.28    396.28 o 
  -3   4   2     4913.86     5107.03     74.31 o 
  -2   4   2    85567.11    86210.13    725.57 o 
  -1   4   2    10092.46    11931.39    126.89 o 
   0   4   2    61717.41    60302.19    580.97 o 
   1   4   2     6589.24     7444.42    112.22 o 
   2   4   2    19040.22    19093.23    212.56 o 
   3   4   2     6572.90     7781.35    149.32 o 
   4   4   2    72331.84    72472.56    630.07 o 
   5   4   2     1550.28     2207.46     87.94 o 
   6   4   2    45600.20    45497.52    416.35 o 
   7   4   2     3316.27     3764.82    103.22 o 
   8   4   2    75383.98    75602.50    657.07 o 
   9   4   2      853.33      902.30     72.69 o 
  10   4   2    33503.58    31087.41    371.78 o 
  11   4   2       58.22      -54.08     89.03 o 
  12   4   2    26766.80    25980.06    335.39 o 
  13   4   2     3951.15     3600.00    165.77 o 
  14   4   2    11836.50    12021.75    268.63 o 
  15   4   2       61.81     -125.22    125.22 o 
  16   4   2    17160.52    17612.90    333.90 o 
  17   4   2     2561.82     2485.04    195.60 o 
  18   4   2     5819.98     6561.92    262.73 o 
  19   4   2      298.01      150.33    162.87 o 
  20   4   2     8442.09     8947.29    313.56 o 
  21   4   2      583.39      364.72    193.40 o 
 -22   5   2      388.00      298.88    210.14 o 
 -21   5   2       56.61      -37.06    220.41 o 
 -20   5   2      686.68      837.21    180.71 o 
 -19   5   2      277.16      298.52    164.58 o 
 -18   5   2     2657.96     2684.74    184.58 o 
 -17   5   2      543.92      607.76    144.07 o 
 -16   5   2     2465.57     2548.72    170.41 o 
 -15   5   2     2760.81     2796.76    157.98 o 
 -14   5   2     4510.66     4710.83    179.07 o 
 -13   5   2     1652.92     1657.55    128.83 o 
 -12   5   2     2406.77     2069.56    127.36 o 
 -11   5   2     1573.46     1577.94    112.33 o 
 -10   5   2    15240.03    14445.47    223.37 o 
  -9   5   2     1105.62     1283.75     82.54 o 
  -8   5   2       56.19      -44.19     59.95 o 
  -7   5   2     2612.99     2770.82     89.80 o 
  -6   5   2     1582.60     1332.48     64.82 o 
  -5   5   2       88.09       72.02     45.59 o 
  -4   5   2      360.01      541.56     46.36 o 
  -3   5   2      785.41      886.21     62.20 o 
  -2   5   2      101.34      108.16     40.99 o 
  -1   5   2     1204.35     1097.34     67.63 o 
   0   5   2    12249.00    13675.36    163.07 o 
   1   5   2        8.75      188.95     56.96 o 
   2   5   2     3122.54     3715.93    107.77 o 
   3   5   2     4221.52     4100.36    110.50 o 
   4   5   2     3404.40     4329.52    116.52 o 
   5   5   2     9273.12    10085.17    172.15 o 
   6   5   2      180.46      247.73     64.00 o 
   7   5   2     1719.66     1954.92     91.47 o 
   8   5   2      573.37      727.72     98.43 o 
   9   5   2     1089.62      968.01    104.78 o 
  10   5   2     4542.53     5037.91    125.24 o 
  11   5   2       38.55       29.35     89.99 o 
  12   5   2     5525.53     5472.80    186.45 o 
  13   5   2     1064.86     1127.80    125.13 o 
  14   5   2      245.96      163.03    121.07 o 
  15   5   2        4.70     -116.80    116.80 o 
  16   5   2     3773.79     3573.31    186.72 o 
  17   5   2     1198.28      953.92    162.47 o 
  18   5   2      774.33      613.15    153.97 o 
  19   5   2      233.25      -65.71    160.91 o 
  20   5   2     2259.83     1835.81    206.76 o 
 -21   6   2     6912.16     7470.77    304.58 o 
 -20   6   2     1973.02     1285.34    202.43 o 
 -19   6   2     9935.48    10748.30    356.20 o 
 -18   6   2     1660.78     1164.05    176.57 o 
 -17   6   2    20048.41    21255.27    501.39 o 
 -16   6   2      717.33      469.54    137.16 o 
 -15   6   2    17628.08    17093.17    296.48 o 
 -14   6   2     2225.20     1772.01    138.61 o 
 -13   6   2    26061.76    25988.86    357.48 o 
 -12   6   2      391.86      342.40    101.60 o 
 -11   6   2    15243.07    14887.81    239.65 o 
 -10   6   2     2248.01     2571.57    134.20 o 
  -9   6   2    31702.02    31098.46    335.09 o 
  -8   6   2     3197.49     3463.90    116.66 o 
  -7   6   2    22671.39    22219.11    285.91 o 
  -6   6   2       70.85       13.70     64.99 o 
  -5   6   2    26779.67    24910.52    286.31 o 
  -4   6   2     5668.48     5698.26    117.98 o 
  -3   6   2    23382.37    22467.65    324.32 o 
  -2   6   2    10613.03    12203.52    164.66 o 
  -1   6   2    32359.26    28982.90    257.38 o 
   0   6   2     5120.69     5899.37     98.83 o 
   1   6   2    48298.35    47006.03    436.50 o 
   2   6   2    13782.51    14518.91    175.24 o 
   3   6   2    93423.61    92721.71    731.93 o 
   4   6   2      674.16     1069.76     96.89 o 
   5   6   2    49446.90    48058.74    457.03 o 
   6   6   2     5211.15     4990.56    125.32 o 
   7   6   2    54808.06    53910.71    582.24 o 
   8   6   2     7564.67     7623.55    172.91 o 
   9   6   2    20390.89    20317.13    303.43 o 
  10   6   2     3850.49     4057.47    174.25 o 
  11   6   2    17674.85    17407.46    304.46 o 
  12   6   2     1000.97      913.84    135.13 o 
  13   6   2    20567.91    20871.61    352.58 o 
  14   6   2     3507.66     3275.99    194.96 o 
  15   6   2    17400.38    18211.94    367.66 o 
  16   6   2      966.32      714.48    132.08 o 
  17   6   2    15166.31    15325.65    309.59 o 
  18   6   2     1732.92      984.03    154.06 o 
  19   6   2     6644.24     7702.90    252.37 o 
  20   6   2      557.34       99.89    164.47 o 
 -20   7   2       96.20      185.63    166.61 o 
 -19   7   2      528.73      892.30    175.08 o 
 -18   7   2       79.58      158.24    154.18 o 
 -17   7   2      994.21     1375.02    163.89 o 
 -16   7   2      290.96      207.85    138.43 o 
 -15   7   2     3218.61     3381.77    219.74 o 
 -14   7   2     1198.71     1194.40    130.44 o 
 -13   7   2      270.16      460.55    144.23 o 
 -12   7   2      391.26      307.13    140.21 o 
 -11   7   2     1728.71     1671.01    151.80 o 
 -10   7   2       65.77       49.37    115.49 o 
  -9   7   2     5503.43     5511.87    257.54 o 
  -8   7   2       19.38      -94.96     94.96 o 
  -7   7   2      204.68       84.82     86.76 o 
  -6   7   2      847.17      993.22    103.20 o 
  -5   7   2     4070.99     3997.82    113.77 o 
  -4   7   2      424.86      414.75     84.86 o 
  -3   7   2     2935.94     3052.01    122.03 o 
  -2   7   2    14693.56    13914.64    186.03 o 
  -1   7   2     2562.74     2701.73    101.29 o 
   0   7   2        5.85      226.60     57.74 o 
   1   7   2     1796.63     1784.30    108.06 o 
   2   7   2     3272.03     3088.50    143.84 o 
   3   7   2     2300.20     2144.24     78.35 o 
   4   7   2       58.27      201.76     59.86 o 
   5   7   2      485.92      620.16     70.87 o 
   6   7   2      213.82      450.47    120.34 o 
   7   7   2      461.84      508.30     95.32 o 
   8   7   2      695.97      691.38    133.40 o 
   9   7   2     2027.01     2191.85    136.30 o 
  10   7   2      428.69      405.14    113.92 o 
  11   7   2     5083.30     5118.02    191.56 o 
  12   7   2      670.41      964.83    133.87 o 
  13   7   2      210.24      142.27    140.32 o 
  14   7   2      325.45      360.55    148.05 o 
  15   7   2     1045.68      622.73    163.26 o 
  16   7   2      217.48      157.72    155.81 o 
  17   7   2     1044.22      716.03    192.77 o 
  18   7   2       12.86     -181.80    181.80 o 
  19   7   2      193.21        7.60    197.39 o 
 -20   8   2     4842.68     5044.77    359.90 o 
 -19   8   2     4918.07     3716.32    281.61 o 
 -18   8   2     7092.14     8499.61    356.81 o 
 -17   8   2     3001.19     2278.11    229.21 o 
 -16   8   2    11653.34    12450.61    338.61 o 
 -15   8   2     4519.14     3998.54    229.96 o 
 -14   8   2    12868.43    13022.69    351.02 o 
 -13   8   2     1720.00     1271.34    166.39 o 
 -12   8   2    10913.32    10927.16    281.44 o 
 -11   8   2      785.91      597.37    174.91 o 
 -10   8   2    10236.21    10603.79    257.49 o 
  -9   8   2     1223.26      911.56    127.85 o 
  -8   8   2    25372.42    24444.10    383.90 o 
  -7   8   2      739.30      767.40    110.24 o 
  -6   8   2    13827.06    13248.54    216.81 o 
  -5   8   2      427.67      456.59    111.49 o 
  -4   8   2    43407.19    42228.40    585.08 o 
  -3   8   2     7754.06     8607.10    190.75 o 
  -2   8   2    27379.96    24993.87    335.85 o 
  -1   8   2     3478.66     4252.08    130.49 o 
   0   8   2    16448.22    15063.08    214.69 o 
   1   8   2     7180.24     6907.98    193.39 o 
   2   8   2    30548.64    28617.11    272.92 o 
   3   8   2     2738.95     3019.36     90.55 o 
   4   8   2    10770.29    10106.17    180.86 o 
   5   8   2      312.13      313.98     83.64 o 
   6   8   2    22762.95    22523.52    311.09 o 
   7   8   2    12076.36    12250.94    240.62 o 
   8   8   2    19084.04    19249.27    318.83 o 
   9   8   2     2476.72     2443.42    152.85 o 
  10   8   2    11689.48    11889.01    262.33 o 
  11   8   2     6065.21     6102.40    216.00 o 
  12   8   2    16870.19    16509.47    330.46 o 
  13   8   2     3830.97     3412.45    198.76 o 
  14   8   2     8836.87     9879.31    318.23 o 
  15   8   2     3792.11     3167.49    229.09 o 
  16   8   2     7032.10     7760.00    304.26 o 
  17   8   2     1628.74     1247.31    205.24 o 
  18   8   2     7163.63     8317.12    332.16 o 
 -19   9   2      322.22      380.94    216.26 o 
 -18   9   2      181.04     -164.74    200.75 o 
 -17   9   2       33.12     -175.07    183.72 o 
 -16   9   2     2210.29     2705.31    322.15 o 
 -15   9   2       20.54       86.27    166.43 o 
 -14   9   2      801.71      868.38    172.52 o 
 -13   9   2      414.02      366.16    149.91 o 
 -12   9   2     2260.15     2757.25    214.37 o 
 -11   9   2      452.14      376.01    133.18 o 
 -10   9   2     1759.33     2287.69    162.75 o 
  -9   9   2      289.46      186.94    121.03 o 
  -8   9   2     1863.23     1902.50    146.55 o 
  -7   9   2       62.42      174.70     97.07 o 
  -6   9   2       79.93      -93.84    117.19 o 
  -5   9   2      165.61      332.03    130.37 o 
  -4   9   2     8108.06     7839.68    223.90 o 
  -3   9   2     2241.24     2460.48    152.81 o 
  -2   9   2      470.56      410.95    102.63 o 
  -1   9   2      125.97      254.22     91.15 o 
   0   9   2     7103.68     7130.34    169.85 o 
   1   9   2        7.61       91.22     95.68 o 
   2   9   2      705.07      744.02    112.68 o 
   3   9   2      998.63      941.42     90.65 o 
   4   9   2     1614.38     1359.82    124.24 o 
   5   9   2       67.91      273.32    103.96 o 
   6   9   2     4274.22     4571.15    178.84 o 
   7   9   2      479.40      410.56    119.79 o 
   8   9   2     3893.99     3676.80    179.09 o 
   9   9   2       68.04      -14.15    117.63 o 
  10   9   2     2352.35     2027.59    160.71 o 
  11   9   2      647.84      479.37    134.82 o 
  12   9   2      268.26       41.25    133.61 o 
  13   9   2      164.98     -138.54    138.54 o 
  14   9   2       93.13      -49.92    150.57 o 
  15   9   2      187.57      -41.20    168.38 o 
  16   9   2      306.69      162.94    182.41 o 
  17   9   2      982.61      304.12    206.55 o 
 -17  10   2     2402.92     2351.33    243.54 o 
 -16  10   2     2393.63     1669.79    233.85 o 
 -15  10   2     7217.53     7738.51    426.09 o 
 -14  10   2     6083.64     5886.22    259.65 o 
 -13  10   2     6323.41     7526.98    265.88 o 
 -12  10   2     3475.90     3202.83    209.48 o 
 -11  10   2    12195.12    13087.18    417.35 o 
 -10  10   2     3839.67     3523.16    187.28 o 
  -9  10   2    19663.41    19523.62    413.53 o 
  -8  10   2     3493.13     3649.53    235.80 o 
  -7  10   2    19467.12    19603.45    424.94 o 
  -6  10   2      804.70      732.77    163.98 o 
  -5  10   2    15256.81    14845.83    353.76 o 
  -4  10   2    13494.22    13537.81    330.28 o 
  -3  10   2    17055.16    16589.01    363.20 o 
  -2  10   2     9766.70    10094.15    241.23 o 
  -1  10   2     7583.28     7023.03    212.31 o 
   0  10   2     6437.33     7216.07    200.89 o 
   1  10   2    19107.67    18759.12    311.74 o 
   2  10   2     9082.06     9349.41    247.10 o 
   3  10   2     9069.74     8988.48    263.20 o 
   4  10   2     8720.26     9198.93    272.61 o 
   5  10   2     6165.40     6413.56    235.19 o 
   6  10   2     5693.70     5970.58    209.98 o 
   7  10   2    17573.12    17781.58    353.20 o 
   8  10   2     6611.59     6892.30    236.32 o 
   9  10   2     4692.06     5266.40    220.68 o 
  10  10   2     2199.88     2372.01    269.12 o 
  11  10   2    10083.63    10928.48    296.42 o 
  12  10   2     2012.51     1741.41    188.31 o 
  13  10   2     6406.74     7476.46    398.61 o 
  14  10   2     2289.66     1760.89    217.28 o 
  15  10   2     5154.06     6162.90    334.76 o 
  16  10   2     2111.46     1545.92    262.28 o 
 -16  11   2       32.23     -186.30    186.30 o 
 -15  11   2      151.25      -65.40    181.01 o 
 -14  11   2       12.62     -165.72    165.72 o 
 -13  11   2      143.72      187.18    167.99 o 
 -12  11   2       41.41       62.94    200.06 o 
 -11  11   2      506.72      621.91    159.60 o 
 -10  11   2      370.88      443.01    190.49 o 
  -9  11   2      106.94      198.71    197.86 o 
  -8  11   2     1185.35     1406.32    310.70 o 
  -7  11   2      264.44      316.44    186.68 o 
  -6  11   2       77.03      184.58    178.84 o 
  -5  11   2      687.46      813.93    169.83 o 
  -4  11   2     1123.92     1461.83    179.44 o 
  -3  11   2     6251.46     6651.09    243.40 o 
  -2  11   2       44.21      -27.64    127.30 o 
  -1  11   2     4311.48     4259.87    196.57 o 
   0  11   2        3.07      140.40    132.94 o 
   1  11   2     5176.42     5010.58    200.40 o 
   2  11   2      655.73      689.39    144.89 o 
   3  11   2      788.43      560.16    147.30 o 
   4  11   2      673.26      709.52    159.74 o 
   5  11   2     3883.48     3447.03    220.30 o 
   6  11   2      249.92      235.64    118.70 o 
   7  11   2      643.59      293.10    135.11 o 
   8  11   2       11.19      170.53    130.64 o 
   9  11   2     2380.62     1616.16    192.58 o 
  10  11   2        0.32     -142.41    142.41 o 
  11  11   2      235.74      150.85    158.60 o 
  12  11   2      359.50       60.62    188.30 o 
  13  11   2      379.44      237.02    179.92 o 
  14  11   2      404.63      139.27    182.73 o 
  15  11   2       15.53     -174.46    197.30 o 
 -14  12   2     5090.04     6116.01    316.21 o 
 -13  12   2     6905.91     6674.54    311.83 o 
 -12  12   2     3175.63     3201.60    282.26 o 
 -11  12   2     4092.61     3939.49    287.71 o 
 -10  12   2     9259.57     9968.86    372.29 o 
  -9  12   2     6637.48     6529.10    365.40 o 
  -8  12   2     8615.85     9090.97    332.19 o 
  -7  12   2     4268.30     4190.43    260.46 o 
  -6  12   2    10153.22    10341.48    333.84 o 
  -5  12   2    13419.59    13338.99    362.13 o 
  -4  12   2    10738.61    10421.54    295.01 o 
  -3  12   2     5778.12     6098.18    243.37 o 
  -2  12   2     4379.77     4768.56    239.89 o 
  -1  12   2     6023.68     6043.05    266.96 o 
   0  12   2    12458.04    12386.38    310.74 o 
   1  12   2     2372.18     2887.97    196.90 o 
   2  12   2    13409.67    13167.55    348.77 o 
   3  12   2     2243.21     1962.97    181.11 o 
   4  12   2     4526.30     5131.99    237.01 o 
   5  12   2     4300.91     4692.35    250.97 o 
   6  12   2     9679.47     9879.67    464.68 o 
   7  12   2     3087.26     2962.12    375.66 o 
   8  12   2     6003.30     6455.88    230.88 o 
   9  12   2     1848.90     1833.64    178.55 o 
  10  12   2     6571.75     7213.49    266.81 o 
  11  12   2     2663.27     2192.38    208.28 o 
  12  12   2     6662.73     7507.11    299.27 o 
  13  12   2     3754.80     3277.23    290.90 o 
 -12  13   2      110.70     -189.22    216.00 o 
 -11  13   2      208.03        3.69    212.87 o 
 -10  13   2     1470.54     1936.32    248.33 o 
  -9  13   2      442.24      169.83    201.01 o 
  -8  13   2      155.49     -147.63    186.56 o 
  -7  13   2       36.26     -180.65    180.65 o 
  -6  13   2     1802.61     2399.62    230.83 o 
  -5  13   2        1.14      165.24    164.47 o 
  -4  13   2     1505.63     1981.50    201.29 o 
  -3  13   2       44.26     -123.48    161.65 o 
  -2  13   2       54.45      -86.37    158.87 o 
  -1  13   2       69.39       50.54    213.99 o 
   0  13   2      531.78      570.24    180.93 o 
   1  13   2        4.48       77.52    160.13 o 
   2  13   2     1241.73      968.33    177.84 o 
   3  13   2      425.75      408.27    207.03 o 
   4  13   2       47.85       -4.24    162.00 o 
   5  13   2       73.73       30.86    159.92 o 
   6  13   2       24.96      -85.57    176.17 o 
   7  13   2      645.89      176.13    192.78 o 
   8  13   2      501.54      -29.85    223.04 o 
   9  13   2      384.52      516.79    208.19 o 
  10  13   2      119.62     -202.44    202.44 o 
  11  13   2       86.58       92.82    172.35 o 
  -9  14   2     3137.05     2806.63    299.97 o 
  -8  14   2     2287.80     1786.97    345.70 o 
  -7  14   2     2829.94     2763.19    238.68 o 
  -6  14   2     5646.90     5563.80    285.42 o 
  -5  14   2     4009.63     4503.62    274.50 o 
  -4  14   2     9179.99     9038.35    335.68 o 
  -3  14   2     2361.57     2732.20    236.08 o 
  -2  14   2     4921.63     4943.67    274.02 o 
  -1  14   2     2876.66     2954.19    264.57 o 
   0  14   2     7194.99     7324.65    282.49 o 
   1  14   2     6699.09     7467.20    399.47 o 
   2  14   2     3860.42     4239.54    379.86 o 
   3  14   2     5423.04     5842.36    316.23 o 
   4  14   2     3291.40     3413.73    249.16 o 
   5  14   2     6915.50     7510.33    319.83 o 
   6  14   2     1999.03     1822.31    227.77 o 
   7  14   2     4313.05     4576.62    286.99 o 
   8  14   2     2718.89     2879.94    284.79 o 
  -5  15   2     2027.76     2633.78    258.20 o 
  -4  15   2      540.63      369.55    206.86 o 
  -3  15   2      155.11     -227.97    227.97 o 
  -2  15   2       76.84     -184.76    184.76 o 
  -1  15   2      349.00      529.59    210.43 o 
   0  15   2       34.13     -269.89    271.77 o 
   1  15   2      265.22      286.07    198.18 o 
   2  15   2      177.29     -160.89    269.59 o 
   3  15   2      738.82      289.38    199.11 o 
   4  15   2        1.86     -205.56    438.13 o 
 -23   0   3     1035.54     1226.77    623.18 o 
 -21   0   3     3253.06     3808.50    397.12 o 
 -19   0   3     1183.30     1452.32    305.09 o 
 -17   0   3      388.36       20.05    287.41 o 
 -15   0   3     2312.34     2318.95    182.80 o 
 -13   0   3     6773.06     6227.79    195.27 o 
 -11   0   3    11529.83    10621.46    206.69 o 
  -9   0   3     5632.47     5153.54    150.92 o 
  -7   0   3     1324.89     1316.17     94.90 o 
  -5   0   3    51597.27    48054.76    537.16 o 
  -3   0   3   103345.67   103198.56   1257.16 o 
  -1   0   3    14348.22    13993.60    214.30 o 
   1   0   3    13645.42    14978.43    214.80 o 
   3   0   3     5389.82     6491.05    144.62 o 
   5   0   3    12437.12    13671.57    298.97 o 
   7   0   3     2274.65     3614.86    151.05 o 
   9   0   3    11345.41    12453.06    235.94 o 
  11   0   3      847.24     1112.60    146.92 o 
  13   0   3    15160.52    16552.63    390.10 o 
  15   0   3     1294.78     1230.87    197.89 o 
  17   0   3     2110.91     1763.12    248.15 o 
  19   0   3      654.12      730.66    300.41 o 
  21   0   3      882.10      725.62    345.88 o 
 -23   1   3     1345.27     1172.42    248.01 o 
 -22   1   3     4116.80     3849.94    359.92 o 
 -21   1   3     5245.40     4977.22    300.18 o 
 -20   1   3     4993.25     4894.09    291.43 o 
 -19   1   3     6173.84     6058.30    299.59 o 
 -18   1   3     7081.14     7277.03    259.98 o 
 -17   1   3    14653.32    13938.97    291.65 o 
 -16   1   3    12387.16    11194.61    268.39 o 
 -15   1   3     7552.85     7402.27    180.26 o 
 -14   1   3    12404.99    11892.35    196.63 o 
 -13   1   3    15183.62    14777.85    201.89 o 
 -12   1   3    28286.48    29051.81    286.68 o 
 -11   1   3    30820.77    29369.52    273.62 o 
 -10   1   3    23146.72    22620.69    223.29 o 
  -9   1   3    54474.61    53503.38    420.53 o 
  -8   1   3    35900.00    35879.99    311.70 o 
  -7   1   3    29024.47    29662.96    246.77 o 
  -6   1   3     9136.25     9117.92    111.64 o 
  -5   1   3    14720.96    15012.29    158.95 o 
  -4   1   3   123571.95   123699.15   1414.30 o 
  -3   1   3    28303.58    29228.14    308.98 o 
  -2   1   3    23621.47    23457.05    257.84 o 
  -1   1   3    68241.12    71636.86    691.41 o 
   0   1   3   154227.78   158506.09   1608.54 o 
   1   1   3    28736.05    31171.11    251.52 o 
   2   1   3    11690.20    10631.36    115.01 o 
   3   1   3     2347.32     2726.29     73.01 o 
   4   1   3    78294.10    81206.78    662.76 o 
   5   1   3    23838.38    23457.51    234.55 o 
   6   1   3    28474.24    26722.42    271.22 o 
   7   1   3    23540.27    23045.53    253.81 o 
   8   1   3    18617.98    18899.34    218.69 o 
   9   1   3    13913.38    13398.77    189.71 o 
  10   1   3    12289.59    11468.78    181.70 o 
  11   1   3    10876.13    10071.67    188.53 o 
  12   1   3    19217.79    19213.09    290.17 o 
  13   1   3    14885.43    14185.20    252.77 o 
  14   1   3    14864.55    14675.84    267.19 o 
  15   1   3     9179.20     9113.07    227.88 o 
  16   1   3    11186.84    11262.57    290.62 o 
  17   1   3    12740.58    12640.26    312.95 o 
  18   1   3    12672.87    12417.65    319.62 o 
  19   1   3     8493.86     8729.09    454.36 o 
  20   1   3     3146.65     3200.07    274.05 o 
  21   1   3     4979.18     4861.78    311.22 o 
 -23   2   3      229.54      192.14    255.72 o 
 -22   2   3     1489.52     1872.28    267.72 o 
 -21   2   3       11.10     -206.89    206.89 o 
 -20   2   3     2576.74     2819.01    298.96 o 
 -19   2   3      149.65     -157.17    157.17 o 
 -18   2   3     3774.44     3784.03    202.91 o 
 -17   2   3      860.28     1033.81    143.55 o 
 -16   2   3     5313.73     5703.85    197.76 o 
 -15   2   3       38.81      -16.86    109.11 o 
 -14   2   3     1509.94     1266.23    118.99 o 
 -13   2   3       78.35      -21.00     78.73 o 
 -12   2   3     3883.12     3287.78    107.56 o 
 -11   2   3       11.60      -59.01     59.01 o 
 -10   2   3     3451.24     2833.83     89.01 o 
  -9   2   3      168.79       27.83     59.30 o 
  -8   2   3      787.15      525.39     61.69 o 
  -7   2   3      146.66      108.00     55.12 o 
  -6   2   3    65254.05    64979.41    602.23 o 
  -5   2   3    20429.36    21334.34    243.03 o 
  -4   2   3    49396.65    49257.71    477.54 o 
  -3   2   3    44302.77    42611.32    680.16 o 
  -2   2   3     6104.29     5878.01     83.04 o 
  -1   2   3      893.77     1204.87     65.66 o 
   0   2   3    25019.21    27552.54    295.75 o 
   1   2   3    25742.10    27746.08    298.67 o 
   2   2   3      588.68     1105.63     42.75 o 
   3   2   3     5031.78     4736.79     76.80 o 
   4   2   3    21347.98    23338.19    238.50 o 
   5   2   3     2846.38     2817.13     83.54 o 
   6   2   3     8181.76     9765.77    138.45 o 
   7   2   3      564.95      650.66     67.82 o 
   8   2   3     4494.39     5586.98    127.25 o 
   9   2   3      792.48      623.88     77.61 o 
  10   2   3      909.81     1221.76     96.71 o 
  11   2   3      142.48       56.27     78.74 o 
  12   2   3     2106.25     2585.41    128.45 o 
  13   2   3       49.35      -84.95    106.66 o 
  14   2   3      839.67      914.91    148.15 o 
  15   2   3       55.60     -129.44    135.84 o 
  16   2   3     1376.77     1027.23    162.65 o 
  17   2   3       76.07       18.57    173.73 o 
  18   2   3      745.35      509.69    157.41 o 
  19   2   3        6.24     -151.86    151.86 o 
  20   2   3      452.37      215.97    198.53 o 
  21   2   3      551.75      475.52    223.33 o 
 -23   3   3     1091.16     1460.52    278.73 o 
 -22   3   3     4153.99     3733.01    316.34 o 
 -21   3   3     2976.73     2774.36    258.15 o 
 -20   3   3     5158.61     4822.83    261.25 o 
 -19   3   3     4709.09     5076.62    259.18 o 
 -18   3   3     6192.90     6471.19    245.91 o 
 -17   3   3     2693.29     2870.10    215.32 o 
 -16   3   3     8357.03     8049.46    235.07 o 
 -15   3   3     5861.35     6325.15    249.68 o 
 -14   3   3    26458.16    25941.67    344.06 o 
 -13   3   3     6317.60     6762.53    200.54 o 
 -12   3   3    18840.67    18489.09    261.49 o 
 -11   3   3     2648.53     2865.00    113.06 o 
 -10   3   3    26786.26    25158.98    268.17 o 
  -9   3   3     1020.39      627.70     62.32 o 
  -8   3   3    29405.90    28735.77    311.96 o 
  -7   3   3     3555.36     3898.67    121.20 o 
  -6   3   3    40477.33    40894.37    428.67 o 
  -5   3   3    29808.51    29167.40    469.11 o 
  -4   3   3    15526.80    15645.17    185.80 o 
  -3   3   3    18035.41    16370.24    289.45 o 
  -2   3   3    10607.19    10626.18    137.56 o 
  -1   3   3    15170.32    14857.53    210.99 o 
   0   3   3     1254.82     1432.99     60.84 o 
   1   3   3     9203.01     8415.20    120.93 o 
   2   3   3    26695.65    27876.41    294.44 o 
   3   3   3     6401.82     5519.66     85.79 o 
   4   3   3    48736.00    49841.93    431.78 o 
   5   3   3    33936.59    33253.95    285.32 o 
   6   3   3    12142.89    11295.58    146.08 o 
   7   3   3    23523.83    23160.37    239.08 o 
   8   3   3    21563.74    20844.10    229.25 o 
   9   3   3     8728.78     8646.84    143.60 o 
  10   3   3     9878.06     8972.23    163.30 o 
  11   3   3    14005.41    14063.70    213.83 o 
  12   3   3    28696.98    28030.37    393.11 o 
  13   3   3     8077.26     8587.93    224.11 o 
  14   3   3    11871.30    11365.85    257.15 o 
  15   3   3     1049.48     1117.19    158.36 o 
  16   3   3     9667.86     9677.52    260.14 o 
  17   3   3     3757.73     3955.03    207.95 o 
  18   3   3     3051.27     2898.97    196.06 o 
  19   3   3     1104.53      837.57    172.75 o 
  20   3   3     9871.78    10490.98    325.13 o 
  21   3   3      835.85      943.36    203.75 o 
 -22   4   3      490.73      546.37    217.91 o 
 -21   4   3     1696.54     1750.04    223.72 o 
 -20   4   3      102.32     -154.75    154.75 o 
 -19   4   3     2562.70     2451.26    198.90 o 
 -18   4   3      840.09      742.36    163.13 o 
 -17   4   3     7879.80     8169.48    246.48 o 
 -16   4   3        6.10     -128.83    128.83 o 
 -15   4   3     8449.16     8547.65    222.67 o 
 -14   4   3        3.79     -101.11    107.92 o 
 -13   4   3     8881.57     8760.61    202.33 o 
 -12   4   3       79.63       96.28     95.37 o 
 -11   4   3    14655.73    13417.56    288.13 o 
 -10   4   3     1433.65     1585.08     99.27 o 
  -9   4   3      479.48      176.67     66.96 o 
  -8   4   3     7229.72     7648.65    139.80 o 
  -7   4   3     4447.51     4479.68    115.69 o 
  -6   4   3     1459.70     1818.43     86.15 o 
  -5   4   3     6986.47     6709.05    110.72 o 
  -4   4   3      125.00      102.92     43.05 o 
  -3   4   3      217.45      217.18     40.74 o 
  -2   4   3     9456.06     9776.43    129.52 o 
  -1   4   3     4468.37     4761.96     96.01 o 
   0   4   3     2658.03     3271.09     89.78 o 
   1   4   3     1191.62     1275.63     64.51 o 
   2   4   3    15840.07    16423.24    346.48 o 
   3   4   3     1633.35     1901.66     84.54 o 
   4   4   3     2936.47     3346.30     92.22 o 
   5   4   3    13027.64    13943.42    174.22 o 
   6   4   3     1416.15     2074.60    102.11 o 
   7   4   3     1492.51     2103.27     88.61 o 
   8   4   3      741.72      458.51     58.96 o 
   9   4   3     7190.34     7802.13    169.24 o 
  10   4   3     1927.08     2549.88    113.34 o 
  11   4   3     8953.29     8752.11    218.85 o 
  12   4   3      151.25      -23.56    103.03 o 
  13   4   3     3259.87     3490.89    168.51 o 
  14   4   3       59.42        7.61    119.17 o 
  15   4   3     4545.27     4624.03    199.41 o 
  16   4   3       29.71     -116.47    137.61 o 
  17   4   3     1549.00     1337.13    175.28 o 
  18   4   3      319.95       -2.51    157.31 o 
  19   4   3     1651.16     1456.54    227.99 o 
  20   4   3       15.89     -173.22    178.28 o 
  21   4   3      815.32      291.99    195.20 o 
 -22   5   3      708.03      468.03    204.34 o 
 -21   5   3     6032.72     6128.39    272.04 o 
 -20   5   3     2962.96     3262.43    223.09 o 
 -19   5   3    10430.54     9889.06    300.85 o 
 -18   5   3     6235.59     6868.75    257.82 o 
 -17   5   3     9802.24     9973.21    284.31 o 
 -16   5   3     3385.13     3485.57    192.40 o 
 -15   5   3    11913.04    11520.82    260.79 o 
 -14   5   3     6040.96     6581.84    217.41 o 
 -13   5   3    21340.55    21077.98    313.98 o 
 -12   5   3      124.15      -43.93     96.39 o 
 -11   5   3    20500.81    20353.63    299.66 o 
 -10   5   3    13092.76    12895.34    312.46 o 
  -9   5   3    25302.20    25478.37    323.93 o 
  -8   5   3     1505.34     1239.89     80.27 o 
  -7   5   3    41060.07    41130.07    396.97 o 
  -6   5   3     8326.67     7853.37    125.77 o 
  -5   5   3    35367.81    36411.80    326.35 o 
  -4   5   3     1128.40      629.09     48.26 o 
  -3   5   3    11254.44    11315.88    155.06 o 
  -2   5   3    29889.78    28851.15    269.39 o 
  -1   5   3    50260.01    50850.63    483.68 o 
   0   5   3    18743.84    17404.98    207.49 o 
   1   5   3    43080.43    42861.84    420.80 o 
   2   5   3    23777.67    22810.19    259.24 o 
   3   5   3   113749.41   116083.83   1085.27 o 
   4   5   3     1029.68      998.66     66.79 o 
   5   5   3    39098.40    38994.69    381.11 o 
   6   5   3    11466.47    11096.48    165.66 o 
   7   5   3    38112.93    36373.93    396.28 o 
   8   5   3    15526.59    15315.98    226.23 o 
   9   5   3    17119.19    17069.52    286.34 o 
  10   5   3     3994.72     4542.01    167.31 o 
  11   5   3    15693.39    14718.11    218.22 o 
  12   5   3     6240.49     7362.13    262.15 o 
  13   5   3    15307.16    14772.56    275.45 o 
  14   5   3     3023.44     3722.98    173.71 o 
  15   5   3     8189.50     8456.70    257.10 o 
  16   5   3     2117.79     2782.76    178.82 o 
  17   5   3     7311.73     7992.76    251.16 o 
  18   5   3     2889.62     3085.17    234.69 o 
  19   5   3     5260.78     5201.58    251.82 o 
  20   5   3      542.50      295.49    182.41 o 
 -21   6   3      130.81      285.42    194.88 o 
 -20   6   3     4313.00     4308.26    318.02 o 
 -19   6   3      340.62      453.27    170.73 o 
 -18   6   3     1726.34     1815.23    187.96 o 
 -17   6   3     1109.70      904.55    165.07 o 
 -16   6   3     1868.43     2455.36    180.06 o 
 -15   6   3     2094.76     1979.62    156.63 o 
 -14   6   3      281.41      210.33    117.30 o 
 -13   6   3     2089.43     1794.22    138.05 o 
 -12   6   3     5881.70     6024.09    180.80 o 
 -11   6   3      304.36      117.92     91.39 o 
 -10   6   3     4843.08     5195.77    151.40 o 
  -9   6   3      562.06      405.86     72.58 o 
  -8   6   3     1393.23     1150.45     75.74 o 
  -7   6   3     1073.03     1476.93     84.66 o 
  -6   6   3     4068.36     4016.49     88.54 o 
  -5   6   3      153.56      180.95     42.12 o 
  -4   6   3     8261.09     8385.84    136.89 o 
  -3   6   3     6327.53     6484.51    109.28 o 
  -2   6   3      912.46      723.89     47.54 o 
  -1   6   3      242.14      197.27     47.91 o 
   0   6   3     3075.91     3072.65    102.65 o 
   1   6   3      684.09      966.92     68.44 o 
   2   6   3     3395.85     3682.92     99.75 o 
   3   6   3       34.69       35.38     61.30 o 
   4   6   3     1465.71     1499.21     76.04 o 
   5   6   3       57.11      -57.15     58.43 o 
   6   6   3    13311.38    13393.70    188.16 o 
   7   6   3     2235.39     2754.27    119.65 o 
   8   6   3     5170.58     5720.39    165.16 o 
   9   6   3       90.34       71.09     99.66 o 
  10   6   3     4736.58     5575.89    223.56 o 
  11   6   3       51.70     -108.36    108.36 o 
  12   6   3     1979.93     1787.19    146.42 o 
  13   6   3     5725.37     5638.39    259.29 o 
  14   6   3     7318.23     7416.83    258.51 o 
  15   6   3      514.99      383.01    166.46 o 
  16   6   3      667.57      352.50    157.01 o 
  17   6   3      864.77      371.21    171.10 o 
  18   6   3     2096.37     1775.12    205.89 o 
  19   6   3      155.67     -185.87    194.95 o 
  20   6   3      588.75      550.02    245.22 o 
 -21   7   3      758.19      612.38    290.87 o 
 -20   7   3     5416.14     5460.51    419.82 o 
 -19   7   3     4392.16     5090.30    250.18 o 
 -18   7   3    15919.26    16250.31    365.77 o 
 -17   7   3      678.88      657.88    155.30 o 
 -16   7   3     9976.53     9810.61    262.02 o 
 -15   7   3     5321.67     5568.67    206.50 o 
 -14   7   3     6500.09     6347.77    205.64 o 
 -13   7   3     3567.13     3860.49    167.82 o 
 -12   7   3    18241.61    17588.03    314.77 o 
 -11   7   3     1579.17     1418.94    114.17 o 
 -10   7   3     5569.10     6137.01    205.43 o 
  -9   7   3     5598.37     5352.34    186.65 o 
  -8   7   3    20800.96    20656.76    335.55 o 
  -7   7   3     7218.26     6583.36    181.72 o 
  -6   7   3    18648.73    19031.17    267.39 o 
  -5   7   3     6750.29     6194.35    187.15 o 
  -4   7   3     2839.06     2885.15    121.64 o 
  -3   7   3     7007.23     6015.41    139.71 o 
  -2   7   3    28112.15    27760.22    302.15 o 
  -1   7   3    12496.80    11537.98    150.86 o 
   0   7   3    45864.12    45795.48    397.49 o 
   1   7   3     3993.10     3659.75    121.10 o 
   2   7   3    24417.16    23594.02    264.62 o 
   3   7   3     9820.80     9490.30    151.95 o 
   4   7   3    24649.33    23105.28    250.57 o 
   5   7   3      971.74      986.61     77.40 o 
   6   7   3    20714.01    19819.41    281.37 o 
   7   7   3     3912.25     4391.53    185.24 o 
   8   7   3    37367.39    37362.70    458.45 o 
   9   7   3      261.00      323.34    109.47 o 
  10   7   3    20716.94    20632.38    325.27 o 
  11   7   3     3291.67     4325.24    181.95 o 
  12   7   3    14189.83    14273.25    286.10 o 
  13   7   3     7442.77     8585.05    246.72 o 
  14   7   3    10458.26    10788.49    288.89 o 
  15   7   3     3903.28     4810.54    233.44 o 
  16   7   3     5205.30     5485.12    267.55 o 
  17   7   3     2283.26     2674.72    216.48 o 
  18   7   3     9401.38     9964.41    363.07 o 
  19   7   3     1726.16     2236.34    245.48 o 
 -20   8   3      303.69      600.11    230.05 o 
 -19   8   3     2755.28     2402.90    258.92 o 
 -18   8   3      764.87      887.94    216.89 o 
 -17   8   3     2226.03     2311.91    231.42 o 
 -16   8   3      226.30      133.31    160.84 o 
 -15   8   3     2854.20     3357.86    215.64 o 
 -14   8   3     2242.95     2386.51    188.11 o 
 -13   8   3     3414.38     3448.42    201.52 o 
 -12   8   3      121.89      116.28    133.54 o 
 -11   8   3     2058.11     1964.76    163.53 o 
 -10   8   3      314.24      480.67    127.84 o 
  -9   8   3     2405.11     2730.99    158.18 o 
  -8   8   3     3436.75     3618.78    161.39 o 
  -7   8   3     6132.70     5928.25    211.29 o 
  -6   8   3      719.70      844.84    128.89 o 
  -5   8   3     7113.50     7080.69    204.06 o 
  -4   8   3     7931.80     8733.94    214.61 o 
  -3   8   3     3716.42     3623.15    145.66 o 
  -2   8   3      237.53      276.68     83.08 o 
  -1   8   3     3620.53     3563.62    187.83 o 
   0   8   3       23.62      -49.53     49.53 o 
   1   8   3     6633.02     5980.36    141.64 o 
   2   8   3     1418.39     1553.69     84.29 o 
   3   8   3      669.39      678.44     84.24 o 
   4   8   3     3658.89     3851.56    123.05 o 
   5   8   3     1506.14     1410.27    103.15 o 
   6   8   3     1906.09     2017.37    180.46 o 
   7   8   3     3658.54     3811.64    148.78 o 
   8   8   3     5347.15     5550.63    175.76 o 
   9   8   3     2714.22     2751.50    150.49 o 
  10   8   3      379.75      515.93    129.74 o 
  11   8   3      380.59      468.05    129.40 o 
  12   8   3     1171.42      821.06    150.03 o 
  13   8   3     1261.47      925.88    155.90 o 
  14   8   3     1856.48     1593.19    211.77 o 
  15   8   3      365.70      193.80    230.08 o 
  16   8   3      491.28      202.67    178.46 o 
  17   8   3      756.96      405.50    228.05 o 
  18   8   3      604.05      258.89    207.78 o 
 -19   9   3     3736.23     3494.90    292.60 o 
 -18   9   3      182.46      -84.71    202.25 o 
 -17   9   3    10745.61    11068.93    506.28 o 
 -16   9   3      567.28      575.75    180.20 o 
 -15   9   3     6039.23     5882.84    258.14 o 
 -14   9   3     2090.44     2351.75    193.51 o 
 -13   9   3    23166.30    23080.25    428.73 o 
 -12   9   3      500.86      424.74    144.74 o 
 -11   9   3     8418.33     8199.26    244.04 o 
 -10   9   3      505.49      325.08    126.37 o 
  -9   9   3    11474.46    10933.79    252.73 o 
  -8   9   3      946.80      823.80    119.36 o 
  -7   9   3    26296.92    25964.94    448.09 o 
  -6   9   3      567.04      324.02    131.21 o 
  -5   9   3    22155.22    21791.33    457.52 o 
  -4   9   3     8317.84     7855.17    222.14 o 
  -3   9   3    22276.67    22385.96    376.43 o 
  -2   9   3     2319.10     1956.46    124.73 o 
  -1   9   3    31631.45    30844.82    385.99 o 
   0   9   3     1019.94      693.76     97.60 o 
   1   9   3    11802.68    11567.15    278.90 o 
   2   9   3       97.12      -71.49     71.49 o 
   3   9   3    20083.05    20208.45    297.50 o 
   4   9   3       60.17      -59.43     95.94 o 
   5   9   3    24572.75    24591.03    381.26 o 
   6   9   3       65.77       93.62    105.64 o 
   7   9   3    11632.58    11831.45    261.58 o 
   8   9   3      227.13      358.65    124.56 o 
   9   9   3    25124.93    24955.98    421.85 o 
  10   9   3      623.23     1037.91    152.62 o 
  11   9   3     5832.05     6089.34    237.24 o 
  12   9   3     1481.89     1794.00    168.39 o 
  13   9   3    14313.85    14258.30    394.77 o 
  14   9   3     2032.57     2591.67    211.42 o 
  15   9   3     6774.45     7917.94    345.21 o 
  16   9   3     1354.27     1638.72    223.44 o 
  17   9   3     5996.93     6393.57    308.31 o 
 -18  10   3      996.41     1157.92    233.47 o 
 -17  10   3      686.14      474.88    190.60 o 
 -16  10   3      159.07       74.84    177.33 o 
 -15  10   3      320.70      481.88    168.66 o 
 -14  10   3     1209.55     1334.25    181.37 o 
 -13  10   3     2749.24     2799.97    199.08 o 
 -12  10   3     2960.50     3135.06    197.61 o 
 -11  10   3       18.09     -127.70    127.70 o 
 -10  10   3     1879.75     2466.66    165.05 o 
  -9  10   3     1425.85     1200.93    173.45 o 
  -8  10   3     7043.17     7626.50    261.36 o 
  -7  10   3     1211.17     1423.40    169.78 o 
  -6  10   3     6697.18     7148.89    302.67 o 
  -5  10   3      642.74      724.43    159.18 o 
  -4  10   3     8404.39     8654.84    272.98 o 
  -3  10   3       27.41      -55.19    125.31 o 
  -2  10   3     2404.49     2516.72    160.12 o 
  -1  10   3      198.98      166.18    117.46 o 
   0  10   3     2276.60     2379.49    140.33 o 
   1  10   3     2864.79     3214.43    154.90 o 
   2  10   3      369.79      433.40    134.79 o 
   3  10   3     2284.11     2004.88    129.85 o 
   4  10   3     4861.45     4498.48    176.32 o 
   5  10   3      286.21       94.20    118.64 o 
   6  10   3     5352.08     5235.01    282.68 o 
   7  10   3     1573.83     1197.59    142.25 o 
   8  10   3     3923.20     3764.66    191.52 o 
   9  10   3      769.42      389.44    143.40 o 
  10  10   3       28.06      -63.62    134.41 o 
  11  10   3      489.71      115.37    144.27 o 
  12  10   3       34.34     -146.85    146.85 o 
  13  10   3      924.01      388.71    167.37 o 
  14  10   3       51.32     -172.52    172.52 o 
  15  10   3     1490.31      661.05    204.83 o 
  16  10   3      159.28     -252.16    252.16 o 
 -16  11   3     5897.26     6177.50    306.59 o 
 -15  11   3       33.85     -179.77    179.77 o 
 -14  11   3     8990.22     8903.33    419.96 o 
 -13  11   3       69.33      -43.27    160.62 o 
 -12  11   3    16381.58    16843.15    443.27 o 
 -11  11   3     1126.23     1022.78    213.52 o 
 -10  11   3     9358.94     9580.48    350.26 o 
  -9  11   3      620.58      426.24    182.63 o 
  -8  11   3    22333.74    22269.07    487.15 o 
  -7  11   3      638.44      363.96    169.15 o 
  -6  11   3    23883.82    23980.32    614.66 o 
  -5  11   3      351.94      148.83    155.23 o 
  -4  11   3    16508.55    16113.92    375.89 o 
  -3  11   3     2907.84     2784.83    188.82 o 
  -2  11   3    20659.71    20232.28    365.07 o 
  -1  11   3     3189.26     2938.65    221.63 o 
   0  11   3    13470.91    13131.79    303.17 o 
   1  11   3     4262.00     4134.54    186.55 o 
   2  11   3     7386.21     7845.81    246.80 o 
   3  11   3      329.02      310.83    156.90 o 
   4  11   3    16090.86    16797.41    395.41 o 
   5  11   3       18.76      -19.47    188.55 o 
   6  11   3     9919.96    10114.73    263.33 o 
   7  11   3       99.25      -12.85    150.24 o 
   8  11   3     8721.14     9054.93    271.91 o 
   9  11   3     1105.19     1162.47    174.77 o 
  10  11   3     9783.92     9760.63    390.81 o 
  11  11   3      546.48      439.15    170.03 o 
  12  11   3     9796.05    10353.83    372.56 o 
  13  11   3      428.22      556.70    192.94 o 
  14  11   3    11951.97    11734.71    631.65 o 
 -15  12   3      194.50     -386.42    430.11 o 
 -14  12   3       73.18       48.84    172.85 o 
 -13  12   3     2084.52     2499.78    397.70 o 
 -12  12   3      900.13     1142.98    231.62 o 
 -11  12   3     1471.72     1718.82    235.93 o 
 -10  12   3      239.19     -189.47    189.47 o 
  -9  12   3      879.88      867.82    220.89 o 
  -8  12   3     1440.82     1437.96    218.03 o 
  -7  12   3      971.08     1239.20    199.45 o 
  -6  12   3      271.85      -62.61    172.06 o 
  -5  12   3     1046.59     1496.49    197.91 o 
  -4  12   3     2657.25     2546.13    241.28 o 
  -3  12   3     3978.55     4511.10    241.76 o 
  -2  12   3     2495.17     2721.08    206.40 o 
  -1  12   3     2945.18     3026.51    196.70 o 
   0  12   3     1375.27     1117.34    159.86 o 
   1  12   3      374.53      345.40    144.57 o 
   2  12   3     2841.46     3112.87    321.04 o 
   3  12   3     1536.07     1427.85    171.04 o 
   4  12   3     1087.28      702.19    158.07 o 
   5  12   3       95.74      149.85    167.78 o 
   6  12   3     1914.49     1684.40    201.55 o 
   7  12   3      791.53      364.69    177.33 o 
   8  12   3      193.24      -27.36    140.48 o 
   9  12   3       90.46       -5.89    188.10 o 
  10  12   3      513.78      -94.58    156.15 o 
  11  12   3      210.58     -122.52    167.52 o 
  12  12   3      390.83      401.90    185.08 o 
  13  12   3     2182.21     2397.41    234.70 o 
 -12  13   3      110.27      -92.50    237.63 o 
 -11  13   3     5446.61     5407.05    353.16 o 
 -10  13   3      720.37      381.51    213.50 o 
  -9  13   3     7881.59     7639.85    359.44 o 
  -8  13   3       70.22      -44.75    187.49 o 
  -7  13   3     8178.12     8690.40    335.78 o 
  -6  13   3        2.75     -166.60    166.60 o 
  -5  13   3     6994.70     6913.23    277.89 o 
  -4  13   3       19.96     -153.96    153.96 o 
  -3  13   3     8921.72     9016.19    316.76 o 
  -2  13   3     1555.22     1193.54    188.73 o 
  -1  13   3     9918.41    11304.79    314.35 o 
   0  13   3      188.55      -72.61    145.99 o 
   1  13   3     7145.45     7629.04    415.09 o 
   2  13   3      836.45      790.58    177.15 o 
   3  13   3    11101.82    11073.90    331.13 o 
   4  13   3      276.40      320.72    170.38 o 
   5  13   3     6663.11     7036.87    297.52 o 
   6  13   3      715.71      829.25    193.97 o 
   7  13   3     4843.04     5367.43    282.13 o 
   8  13   3      645.01      715.83    200.77 o 
   9  13   3     6257.40     6438.11    315.79 o 
  10  13   3      232.97      350.47    167.45 o 
  11  13   3     4665.73     5063.67    285.33 o 
 -10  14   3       43.37     -534.58    580.02 o 
  -9  14   3      585.37      489.73    218.61 o 
  -8  14   3     1530.67     2437.83    259.83 o 
  -7  14   3     1277.83     1326.26    211.96 o 
  -6  14   3      332.12      253.76    185.55 o 
  -5  14   3      398.02      102.18    194.80 o 
  -4  14   3       47.14     -164.66    181.71 o 
  -3  14   3     2303.55     2538.24    248.34 o 
  -2  14   3      986.80      815.51    262.13 o 
  -1  14   3       40.20     -172.41    172.41 o 
   0  14   3       95.79       76.44    173.08 o 
   1  14   3     1266.26     1213.88    204.27 o 
   2  14   3     1595.06     1823.05    222.94 o 
   3  14   3       80.45     -163.08    163.08 o 
   4  14   3      189.05       -3.60    178.58 o 
   5  14   3     1456.27      939.51    207.34 o 
   6  14   3       29.04     -185.56    185.56 o 
   7  14   3      516.97      -94.15    192.34 o 
   8  14   3      296.01      166.97    210.04 o 
  -5  15   3      844.84      307.16    311.25 o 
  -4  15   3     5535.96     5752.90    314.09 o 
  -3  15   3      266.57      -39.13    247.43 o 
  -2  15   3     8920.59     9433.13    567.42 o 
  -1  15   3       27.57     -163.13    230.07 o 
   0  15   3     5637.09     6229.93    324.95 o 
   1  15   3      320.99      545.89    200.58 o 
   2  15   3     6618.14     6977.58    318.11 o 
   3  15   3       20.13     -190.59    190.59 o 
 -22   0   4     6318.65     5888.25    464.83 o 
 -20   0   4     9024.96     8560.21    492.05 o 
 -18   0   4    35221.85    35319.72    901.70 o 
 -16   0   4    27357.49    26179.44    525.73 o 
 -14   0   4    34714.55    33385.31    485.77 o 
 -12   0   4    49120.02    47906.30    569.39 o 
 -10   0   4    29475.94    29633.20    381.47 o 
  -8   0   4    73175.30    74481.38    835.14 o 
  -6   0   4    63604.00    63993.27    706.01 o 
  -4   0   4     3783.68     4457.34    117.45 o 
  -2   0   4   167637.61   177567.03   2789.05 o 
   0   0   4   170123.88   174529.19   2320.26 o 
   2   0   4     2366.51     2775.43    110.75 o 
   4   0   4   112209.25   112329.98   1401.25 o 
   6   0   4     5430.59     5163.58    158.41 o 
   8   0   4    55454.83    52576.09    686.50 o 
  10   0   4    26913.37    25707.57    608.31 o 
  12   0   4    16475.39    15987.03    400.91 o 
  14   0   4    20523.45    19867.71    448.69 o 
  16   0   4    20383.53    20653.84    486.05 o 
  18   0   4    13102.82    13527.26    559.09 o 
  20   0   4    10612.63    10893.78    565.40 o 
 -23   1   4     2921.76     3315.28    290.16 o 
 -22   1   4      484.38      487.86    227.27 o 
 -21   1   4      223.07      450.71    202.04 o 
 -20   1   4     3233.73     3499.01    265.98 o 
 -19   1   4     4880.98     5152.81    285.91 o 
 -18   1   4     7674.77     8169.58    317.71 o 
 -17   1   4     1249.94     1135.52    161.44 o 
 -16   1   4     2149.40     2357.19    151.14 o 
 -15   1   4      448.53      399.77    100.38 o 
 -14   1   4     3226.14     2949.35    130.55 o 
 -13   1   4      824.69      570.22     77.06 o 
 -12   1   4     4405.99     3987.50    106.48 o 
 -11   1   4     1300.51      992.59     72.47 o 
 -10   1   4     6967.94     6299.32    121.28 o 
  -9   1   4     2366.21     1680.86     85.04 o 
  -8   1   4    28057.06    26401.45    254.57 o 
  -7   1   4    13352.01    11854.78    155.02 o 
  -6   1   4    18690.62    18204.37    177.37 o 
  -5   1   4     1892.20     1623.47     54.70 o 
  -4   1   4    62595.57    61106.32    522.88 o 
  -3   1   4     1379.77     1711.44     51.91 o 
  -2   1   4     7242.91     7381.22     93.57 o 
  -1   1   4    10533.02    10871.46    143.49 o 
   0   1   4     5474.40     5617.45    107.07 o 
   1   1   4    21887.96    23790.02    203.08 o 
   2   1   4      257.98      597.00     39.16 o 
   3   1   4     9952.21    10706.54    125.01 o 
   4   1   4     7072.34     8370.90    145.88 o 
   5   1   4      731.21     1179.59     70.55 o 
   6   1   4     2077.93     2656.07     95.02 o 
   7   1   4     8794.29     9572.71    153.43 o 
   8   1   4     2383.28     3015.21    116.36 o 
   9   1   4       94.03       87.51     72.24 o 
  10   1   4      780.22     1232.02     96.63 o 
  11   1   4     6005.41     6912.48    175.61 o 
  12   1   4     2679.18     3208.23    149.27 o 
  13   1   4     1334.50     1207.10    128.92 o 
  14   1   4     8424.31     8127.39    216.06 o 
  15   1   4      406.54      255.05    124.07 o 
  16   1   4      917.11     1046.96    195.31 o 
  17   1   4      653.74      377.68    167.51 o 
  18   1   4     3212.50     2931.99    225.85 o 
  19   1   4     2064.48     1513.65    232.22 o 
  20   1   4      889.45      777.67    227.50 o 
  21   1   4      416.64      506.97    234.98 o 
 -23   2   4     8186.43     8485.75    419.22 o 
 -22   2   4       24.38      173.65    224.60 o 
 -21   2   4     8751.47     8870.93    405.21 o 
 -20   2   4     1314.33      908.29    327.33 o 
 -19   2   4    10135.58    10033.41    301.84 o 
 -18   2   4       45.46      -45.15    145.75 o 
 -17   2   4    14382.11    15113.51    304.46 o 
 -16   2   4     3041.65     3088.24    217.00 o 
 -15   2   4    18957.00    19147.11    306.70 o 
 -14   2   4      662.42      506.89    106.26 o 
 -13   2   4    40921.97    40043.67    419.06 o 
 -12   2   4     5726.92     5791.50    135.85 o 
 -11   2   4    17928.50    16964.21    198.37 o 
 -10   2   4     1607.21     1600.91     85.81 o 
  -9   2   4    17581.58    17196.04    203.62 o 
  -8   2   4      413.54      417.39     67.69 o 
  -7   2   4    37771.54    37925.09    350.91 o 
  -6   2   4     3562.59     3434.32    107.79 o 
  -5   2   4    42286.25    42730.06    510.06 o 
  -4   2   4      619.03      702.23     49.70 o 
  -3   2   4    70118.09    73139.30    724.47 o 
  -2   2   4     1481.56     1867.07     61.42 o 
  -1   2   4   161018.66   166951.67   1594.59 o 
   0   2   4    19215.80    22497.32    282.43 o 
   1   2   4     6610.71     6016.14     92.46 o 
   2   2   4      331.76      275.48     34.08 o 
   3   2   4   118255.57   120268.65    881.69 o 
   4   2   4    27414.61    27285.13    257.05 o 
   5   2   4    32017.87    32055.99    292.74 o 
   6   2   4      205.13      302.81     65.78 o 
   7   2   4     7481.93     6337.33    120.54 o 
   8   2   4      142.45       74.95     63.24 o 
   9   2   4    33164.81    30844.77    329.80 o 
  10   2   4     3037.46     2911.31    115.81 o 
  11   2   4    21717.05    20751.24    281.81 o 
  12   2   4      164.30       52.82     94.55 o 
  13   2   4    35068.65    33764.81    429.14 o 
  14   2   4     1183.52      900.88    153.76 o 
  15   2   4    26470.29    25912.83    475.47 o 
  16   2   4      511.84      194.00    153.52 o 
  17   2   4    11009.12    11567.09    306.61 o 
  18   2   4     3415.21     2984.02    200.62 o 
  19   2   4     7701.63     8942.33    350.81 o 
  20   2   4      131.54      155.77    202.39 o 
  21   2   4     9865.44    11799.61    420.92 o 
 -23   3   4     2402.49     2867.00    311.49 o 
 -22   3   4     3586.58     3186.32    306.65 o 
 -21   3   4     1158.39      914.97    216.42 o 
 -20   3   4     1610.90     1971.87    226.39 o 
 -19   3   4     2812.47     2638.29    198.04 o 
 -18   3   4     6597.15     7661.86    265.58 o 
 -17   3   4     5614.30     5557.04    227.35 o 
 -16   3   4     1219.33     1174.18    150.08 o 
 -15   3   4     4132.26     4156.80    185.06 o 
 -14   3   4    12006.18    12147.86    238.57 o 
 -13   3   4     5084.85     4925.63    166.07 o 
 -12   3   4     1891.37     1802.03    117.28 o 
 -11   3   4     2398.81     1799.39     90.93 o 
 -10   3   4     4578.16     4973.15    162.77 o 
  -9   3   4     8423.52     7641.44    131.87 o 
  -8   3   4     9329.17     8811.70    164.25 o 
  -7   3   4    26326.81    26461.24    299.08 o 
  -6   3   4      911.75      960.02     74.09 o 
  -5   3   4    33879.69    32383.50    342.76 o 
  -4   3   4     1095.08     1125.52     50.63 o 
  -3   3   4    20762.08    19800.40    191.77 o 
  -2   3   4    10012.98     9355.24    115.43 o 
  -1   3   4    24237.21    25669.42    655.11 o 
   0   3   4      555.77      686.94     72.21 o 
   1   3   4    76353.49    81264.30    788.08 o 
   2   3   4     1866.42     1857.45     68.54 o 
   3   3   4     2041.75     3108.55     89.91 o 
   4   3   4      577.18      631.62     61.79 o 
   5   3   4    11482.59    12585.72    142.18 o 
   6   3   4     9735.17    10120.44    134.89 o 
   7   3   4     1230.86     1559.70     76.72 o 
   8   3   4     5015.04     5246.25    114.07 o 
   9   3   4     7492.44     8027.62    140.61 o 
  10   3   4     5723.62     6383.00    147.13 o 
  11   3   4     2749.88     2698.51    126.79 o 
  12   3   4     5192.13     5398.49    187.49 o 
  13   3   4     2792.65     2661.89    158.80 o 
  14   3   4      107.56      -29.96    143.80 o 
  15   3   4      642.78      373.87    149.03 o 
  16   3   4      446.41      579.83    156.21 o 
  17   3   4     2323.30     1871.38    175.62 o 
  18   3   4     1659.32     1423.10    171.09 o 
  19   3   4     3796.44     3110.58    209.85 o 
  20   3   4      242.48      124.90    168.02 o 
  21   3   4      750.36      494.43    196.40 o 
 -23   4   4       26.20     -177.77    239.02 o 
 -22   4   4     5385.27     5658.09    320.16 o 
 -21   4   4      893.33      323.23    185.80 o 
 -20   4   4     9233.33     9257.50    302.74 o 
 -19   4   4      385.59      314.15    158.49 o 
 -18   4   4     6496.82     6670.41    304.50 o 
 -17   4   4       22.94       74.69    140.16 o 
 -16   4   4    12982.46    12711.29    342.71 o 
 -15   4   4     3767.36     3764.49    264.45 o 
 -14   4   4    15603.16    15495.39    285.13 o 
 -13   4   4     8036.52     8554.96    211.88 o 
 -12   4   4    16730.68    16736.78    304.98 o 
 -11   4   4     7495.23     7642.01    229.65 o 
 -10   4   4     3438.59     3786.20    208.36 o 
  -9   4   4      605.10      575.95     82.44 o 
  -8   4   4    32905.67    32047.82    353.96 o 
  -7   4   4       99.03      148.29     76.04 o 
  -6   4   4    38943.05    36951.20    375.48 o 
  -5   4   4      606.73      893.91     67.06 o 
  -4   4   4    73085.47    75706.88    616.86 o 
  -3   4   4     1091.19     1648.96     67.38 o 
  -2   4   4    73721.12    71607.04    645.08 o 
  -1   4   4       60.30       32.77     52.50 o 
   0   4   4    11848.54    10537.05    163.52 o 
   1   4   4     4889.41     5044.37    108.30 o 
   2   4   4    49672.67    47945.41    458.58 o 
   3   4   4     2870.37     3849.43    107.74 o 
   4   4   4    71225.25    70852.37    599.85 o 
   5   4   4     6176.80     6572.27    120.31 o 
   6   4   4    55735.87    55529.49    520.33 o 
   7   4   4      175.77      201.21     68.91 o 
   8   4   4    11675.99    10688.72    148.34 o 
   9   4   4       76.74       53.22     62.18 o 
  10   4   4    30939.95    30524.88    352.67 o 
  11   4   4     2951.46     2685.63    134.51 o 
  12   4   4    10529.92    10638.75    233.83 o 
  13   4   4     1946.04     1607.00    143.16 o 
  14   4   4    17093.31    18246.75    323.78 o 
  15   4   4      620.17      495.00    165.71 o 
  16   4   4     5596.32     5906.88    241.04 o 
  17   4   4      535.32      286.26    157.84 o 
  18   4   4     7205.21     8285.68    288.74 o 
  19   4   4      550.34      384.87    178.94 o 
  20   4   4     5001.29     5395.89    268.94 o 
 -22   5   4     2754.27     3044.84    251.76 o 
 -21   5   4      944.96      859.31    196.50 o 
 -20   5   4     2917.40     3166.79    221.84 o 
 -19   5   4     1075.59     1271.61    177.77 o 
 -18   5   4     3297.81     3222.67    208.70 o 
 -17   5   4     1242.06     1719.28    195.51 o 
 -16   5   4     5504.25     5651.61    225.69 o 
 -15   5   4     1200.31     1120.57    138.26 o 
 -14   5   4     5094.60     5367.38    200.47 o 
 -13   5   4     7915.17     8210.58    211.78 o 
 -12   5   4     9112.92     8667.82    201.56 o 
 -11   5   4     1089.81     1198.24    107.87 o 
 -10   5   4      924.30      771.66     95.55 o 
  -9   5   4     5236.53     5572.37    163.43 o 
  -8   5   4     4407.25     4097.97    111.90 o 
  -7   5   4       57.82      147.94     59.43 o 
  -6   5   4     1215.87      934.69     65.42 o 
  -5   5   4      560.18      556.02     51.90 o 
  -4   5   4     4499.07     4316.21    147.95 o 
  -3   5   4    13051.30    13128.95    159.75 o 
  -2   5   4     3742.19     4197.96    120.43 o 
  -1   5   4     1440.00     2225.24     93.15 o 
   0   5   4    24425.61    24314.64    281.63 o 
   1   5   4     2744.57     2683.99    100.89 o 
   2   5   4     3198.13     4061.41    125.17 o 
   3   5   4     3644.07     3961.42    148.73 o 
   4   5   4     7888.62     8278.43    125.58 o 
   5   5   4     7787.98     7679.67    155.68 o 
   6   5   4    16785.07    18007.84    214.81 o 
   7   5   4    10496.88    10734.83    182.88 o 
   8   5   4     9175.25     9547.20    179.32 o 
   9   5   4     1773.17     1764.41    129.59 o 
  10   5   4     6097.67     6361.52    200.42 o 
  11   5   4     1138.95     1136.73    136.20 o 
  12   5   4     5451.25     5057.80    196.65 o 
  13   5   4     5336.89     5554.06    188.42 o 
  14   5   4     2635.49     2062.78    149.01 o 
  15   5   4      160.92       -6.24    125.25 o 
  16   5   4     4510.45     4312.53    229.35 o 
  17   5   4       44.01     -139.71    139.71 o 
  18   5   4     3733.85     2978.27    209.80 o 
  19   5   4      444.73      394.95    173.43 o 
  20   5   4     1317.60      828.95    188.85 o 
 -22   6   4      580.67      221.94    244.71 o 
 -21   6   4     5380.52     5609.98    384.30 o 
 -20   6   4     1756.70     1369.10    196.84 o 
 -19   6   4     7394.05     7323.07    290.48 o 
 -18   6   4     1425.30     1011.64    178.68 o 
 -17   6   4     7133.02     7247.88    271.05 o 
 -16   6   4      747.30      319.08    140.07 o 
 -15   6   4    11234.31    11198.76    272.52 o 
 -14   6   4     3587.00     3396.03    179.33 o 
 -13   6   4     6893.64     7619.08    227.63 o 
 -12   6   4      387.12      214.10    115.61 o 
 -11   6   4    18715.97    18834.35    287.91 o 
 -10   6   4     5310.45     5846.68    181.87 o 
  -9   6   4    21823.87    21629.33    292.27 o 
  -8   6   4      101.63        3.06     65.03 o 
  -7   6   4    32075.12    30897.57    315.06 o 
  -6   6   4     2446.40     2769.87     94.85 o 
  -5   6   4    14063.50    13084.06    182.77 o 
  -4   6   4    12539.33    12780.50    171.36 o 
  -3   6   4    42254.54    40792.24    402.89 o 
  -2   6   4     8474.69     9721.63    130.56 o 
  -1   6   4    25537.42    23941.55    262.38 o 
   0   6   4     9819.01     9621.50    142.80 o 
   1   6   4    59204.90    57764.20    557.87 o 
   2   6   4     8206.72     8491.73    148.85 o 
   3   6   4    32489.79    30408.83    336.27 o 
   4   6   4     6349.57     6197.67    188.40 o 
   5   6   4    41163.27    40882.95    422.54 o 
   6   6   4     1481.67     1571.80     98.32 o 
   7   6   4    20188.78    19778.03    300.25 o 
   8   6   4     2648.43     2713.00    141.95 o 
   9   6   4    22683.19    22368.33    331.15 o 
  10   6   4      788.69      579.79    113.58 o 
  11   6   4    14054.93    14709.60    281.18 o 
  12   6   4     2189.80     2116.08    155.14 o 
  13   6   4     6017.82     7413.71    250.21 o 
  14   6   4       36.44     -122.67    140.25 o 
  15   6   4    13331.30    14902.62    349.99 o 
  16   6   4     1602.28     1475.23    185.09 o 
  17   6   4     9452.09    10118.15    316.54 o 
  18   6   4      239.15      128.16    173.75 o 
  19   6   4     7254.77     7940.02    350.26 o 
 -21   7   4     4129.19     4639.21    256.64 o 
 -20   7   4      182.07      259.69    176.63 o 
 -19   7   4     3139.58     3553.43    224.28 o 
 -18   7   4      104.97      165.54    157.75 o 
 -17   7   4     3562.08     3929.31    203.73 o 
 -16   7   4      610.09      537.92    139.70 o 
 -15   7   4     2309.16     2297.45    162.79 o 
 -14   7   4     1738.48     1968.70    150.07 o 
 -13   7   4     8006.75     8425.09    237.22 o 
 -12   7   4      244.35      293.95    109.66 o 
 -11   7   4     5143.51     5162.19    171.61 o 
 -10   7   4      101.79      196.06     95.80 o 
  -9   7   4     1226.39      881.92     83.41 o 
  -8   7   4     4024.34     3781.65    145.44 o 
  -7   7   4     5229.42     5041.82    148.62 o 
  -6   7   4      306.29      423.39     68.60 o 
  -5   7   4     5615.88     5348.99    253.82 o 
  -4   7   4     9179.99     8631.69    143.70 o 
  -3   7   4     7516.32     7733.80    123.03 o 
  -2   7   4       70.94      328.99     62.50 o 
  -1   7   4    15208.13    14755.76    187.48 o 
   0   7   4     4202.53     3857.67    149.16 o 
   1   7   4     2158.70     2417.97     94.48 o 
   2   7   4     3241.89     3544.68    104.65 o 
   3   7   4     8449.89     8649.79    157.23 o 
   4   7   4     2264.61     2176.05    118.74 o 
   5   7   4    12312.73    12002.15    176.72 o 
   6   7   4       17.87       54.31     83.06 o 
   7   7   4     9133.79     9319.25    195.84 o 
   8   7   4      133.03      157.30    100.94 o 
   9   7   4     3811.08     4022.63    196.70 o 
  10   7   4     1292.31     1305.09    136.57 o 
  11   7   4     6130.68     5817.43    211.53 o 
  12   7   4      185.98      313.79    129.57 o 
  13   7   4     4380.25     4067.98    228.10 o 
  14   7   4      450.82      340.24    149.42 o 
  15   7   4     2208.36     1680.18    186.16 o 
  16   7   4      102.55      -20.05    160.13 o 
  17   7   4     2196.34     1660.99    202.89 o 
  18   7   4     1333.08     1772.08    214.12 o 
 -20   8   4     6310.42     7021.35    399.18 o 
 -19   8   4     2122.73      967.33    222.72 o 
 -18   8   4     8487.18     8829.87    349.14 o 
 -17   8   4     1359.03      618.06    174.16 o 
 -16   8   4     5640.19     6009.38    268.69 o 
 -15   8   4      956.55      806.59    171.95 o 
 -14   8   4    14689.21    14324.70    335.52 o 
 -13   8   4      192.89       59.70    139.48 o 
 -12   8   4     6885.73     6726.39    231.97 o 
 -11   8   4      366.31     -120.67    120.67 o 
 -10   8   4     8096.45     8214.14    231.22 o 
  -9   8   4     4678.23     4966.72    212.05 o 
  -8   8   4    13843.63    13508.16    318.31 o 
  -7   8   4     2013.53     2306.96    161.96 o 
  -6   8   4    31243.54    31058.91    569.85 o 
  -5   8   4     9899.69    10893.71    248.97 o 
  -4   8   4    27846.27    26866.04    419.28 o 
  -3   8   4     3835.85     4722.15    154.83 o 
  -2   8   4    17135.67    16463.24    280.60 o 
  -1   8   4    13466.46    13485.16    169.34 o 
   0   8   4    11390.61    10654.88    212.00 o 
   1   8   4    11711.26    11645.96    202.99 o 
   2   8   4     9678.06     8856.57    176.54 o 
   3   8   4     1538.13     1285.30    104.59 o 
   4   8   4    26281.36    26499.66    317.66 o 
   5   8   4     3881.53     3947.94    167.62 o 
   6   8   4    12708.54    13043.26    229.27 o 
   7   8   4     1407.45     1406.60    119.47 o 
   8   8   4    14382.50    15184.47    267.30 o 
   9   8   4     2885.79     2646.64    152.74 o 
  10   8   4    16116.64    16857.17    300.50 o 
  11   8   4     2857.86     2372.42    158.47 o 
  12   8   4    12156.59    13815.04    306.15 o 
  13   8   4      135.76       38.97    148.82 o 
  14   8   4     7146.11     7856.13    288.16 o 
  15   8   4     1015.91      776.61    186.46 o 
  16   8   4    10301.94    11801.23    423.65 o 
  17   8   4     1819.20     1296.35    217.34 o 
  18   8   4     5066.49     6020.77    315.24 o 
 -19   9   4       15.37     -153.65    210.91 o 
 -18   9   4     2280.05     2254.82    244.54 o 
 -17   9   4      296.44      -23.90    175.65 o 
 -16   9   4     3119.34     3880.64    240.45 o 
 -15   9   4     1325.12     1245.40    181.58 o 
 -14   9   4     3919.75     4029.74    221.28 o 
 -13   9   4      195.92       43.89    139.30 o 
 -12   9   4    10701.49    11157.82    284.62 o 
 -11   9   4     2096.45     2161.33    166.96 o 
 -10   9   4     5787.85     5979.72    270.19 o 
  -9   9   4     1824.37     2292.83    148.41 o 
  -8   9   4     2360.81     2620.44    188.14 o 
  -7   9   4     1814.70     1849.74    164.11 o 
  -6   9   4    20718.11    19458.36    368.16 o 
  -5   9   4     9304.61     9200.00    281.64 o 
  -4   9   4      141.25      -14.20    112.71 o 
  -3   9   4      378.33      500.39    114.23 o 
  -2   9   4     8105.37     7962.71    189.44 o 
  -1   9   4     1194.59     1094.37    100.94 o 
   0   9   4     1961.60     1917.82     85.30 o 
   1   9   4     1642.61     1586.40     96.14 o 
   2   9   4     7277.32     7118.56    217.82 o 
   3   9   4     3568.81     3937.57    166.58 o 
   4   9   4     1764.98     1772.27    125.56 o 
   5   9   4        5.36      -99.17     99.17 o 
   6   9   4     7810.85     7802.76    213.41 o 
   7   9   4       27.61      -46.96    112.10 o 
   8   9   4     3256.79     3088.53    176.33 o 
   9   9   4      392.22      243.44    132.25 o 
  10   9   4     8073.93     6658.85    239.90 o 
  11   9   4        2.05      -70.75    141.27 o 
  12   9   4     2923.69     2608.48    198.50 o 
  13   9   4      105.41     -103.61    163.88 o 
  14   9   4      167.41       38.11    169.34 o 
  15   9   4        2.12     -182.24    182.24 o 
  16   9   4     1809.52     1294.98    233.70 o 
  17   9   4      137.56      -34.57    210.57 o 
 -18  10   4      765.23      336.29    209.97 o 
 -17  10   4     4993.34     5452.85    278.43 o 
 -16  10   4     3954.40     3211.27    227.34 o 
 -15  10   4     7557.91     8669.11    295.73 o 
 -14  10   4     3848.59     3064.22    209.70 o 
 -13  10   4    14733.42    14751.76    360.98 o 
 -12  10   4     2854.52     2532.55    210.03 o 
 -11  10   4     8356.45     8696.42    251.67 o 
 -10  10   4     2914.90     3047.95    209.83 o 
  -9  10   4    12821.82    12019.65    316.68 o 
  -8  10   4     4665.53     5502.45    241.65 o 
  -7  10   4    11326.52    11102.52    291.88 o 
  -6  10   4    10015.70     9723.21    279.77 o 
  -5  10   4    17083.25    17298.60    366.65 o 
  -4  10   4     8556.95     8998.12    251.48 o 
  -3  10   4     7114.98     6986.32    302.44 o 
  -2  10   4      478.75      468.75    126.00 o 
  -1  10   4     7531.49     7445.69    242.98 o 
   0  10   4     1589.19     1711.83    130.26 o 
   1  10   4     4773.00     4725.81    185.21 o 
   2  10   4     3954.79     4306.01    275.73 o 
   3  10   4     8966.18     9029.84    222.51 o 
   4  10   4    11743.81    11519.11    383.61 o 
   5  10   4    13065.50    13430.12    274.67 o 
   6  10   4     7230.14     7291.69    247.47 o 
   7  10   4     5915.90     6724.84    327.93 o 
   8  10   4     2214.60     1933.36    162.86 o 
   9  10   4     7428.32     8575.08    259.54 o 
  10  10   4     1507.73     1300.15    164.35 o 
  11  10   4     7927.80     9132.11    285.02 o 
  12  10   4      628.21      298.50    157.03 o 
  13  10   4     9225.56    10705.48    322.41 o 
  14  10   4     1237.05      995.01    262.00 o 
  15  10   4     4772.52     5023.09    443.13 o 
 -16  11   4       78.40     -217.17    217.17 o 
 -15  11   4     1669.08     2229.36    274.93 o 
 -14  11   4      184.38      102.79    173.28 o 
 -13  11   4     1459.63     1815.64    189.34 o 
 -12  11   4      518.42      425.22    153.57 o 
 -11  11   4     6516.56     6966.64    693.54 o 
 -10  11   4     1570.91     1754.44    224.15 o 
  -9  11   4     1830.81     1942.46    215.43 o 
  -8  11   4      143.96      388.77    182.56 o 
  -7  11   4     4260.77     4906.65    297.84 o 
  -6  11   4     3393.76     3127.55    224.33 o 
  -5  11   4     3903.39     4197.40    235.41 o 
  -4  11   4       99.22      279.15    143.56 o 
  -3  11   4     4562.37     4457.68    216.29 o 
  -2  11   4       37.21      -21.01    123.04 o 
  -1  11   4    13820.70    13189.82    287.01 o 
   0  11   4       24.21      -93.84    125.27 o 
   1  11   4     8015.10     7621.47    241.35 o 
   2  11   4      310.39      393.25    134.19 o 
   3  11   4     2966.32     3031.13    197.59 o 
   4  11   4       16.89     -104.63    109.28 o 
   5  11   4     3739.00     3468.39    246.25 o 
   6  11   4     1045.12      634.83    139.38 o 
   7  11   4     1173.24      499.78    146.90 o 
   8  11   4        0.87      126.14    137.06 o 
   9  11   4      967.30      688.34    154.20 o 
  10  11   4       37.45     -148.48    148.48 o 
  11  11   4      870.47      178.02    160.46 o 
  12  11   4      279.65      -26.09    158.02 o 
  13  11   4      376.84       34.80    168.69 o 
  14  11   4       46.41      -87.32    192.26 o 
 -15  12   4     3471.15     3003.64    262.83 o 
 -14  12   4     2282.23     2235.49    286.13 o 
 -13  12   4     3069.93     2120.65    258.41 o 
 -12  12   4     3903.33     4160.69    296.27 o 
 -11  12   4     3703.80     3140.54    270.78 o 
 -10  12   4     8681.78     9042.81    359.42 o 
  -9  12   4     1786.24     1642.29    223.82 o 
  -8  12   4     5704.10     5549.37    293.08 o 
  -7  12   4     6150.21     6320.72    295.95 o 
  -6  12   4     8325.60     8420.95    312.35 o 
  -5  12   4     2844.56     2879.23    210.65 o 
  -4  12   4     6293.87     6184.60    253.37 o 
  -3  12   4     2652.83     3061.26    204.81 o 
  -2  12   4     5059.56     5310.68    235.31 o 
  -1  12   4     1549.71     1611.71    173.11 o 
   0  12   4     8085.89     8058.85    322.52 o 
   1  12   4     2293.80     2375.00    192.35 o 
   2  12   4     4279.37     4476.25    235.29 o 
   3  12   4     1433.63     1573.85    169.89 o 
   4  12   4     7406.52     7902.46    295.55 o 
   5  12   4     7369.18     7252.79    280.45 o 
   6  12   4     7738.11     8376.65    246.80 o 
   7  12   4     4658.23     4516.25    238.29 o 
   8  12   4     6796.77     7380.00    260.55 o 
   9  12   4     1798.66     1432.67    224.44 o 
  10  12   4     5190.00     5944.08    270.81 o 
  11  12   4     1644.30     1514.50    197.84 o 
  12  12   4     6336.34     7482.88    307.88 o 
 -13  13   4       28.60     -332.60    338.22 o 
 -12  13   4     2778.56     3431.69    400.47 o 
 -11  13   4       78.54     -206.80    206.80 o 
 -10  13   4     3050.08     3555.28    288.64 o 
  -9  13   4       12.25     -191.40    191.40 o 
  -8  13   4     3979.01     4812.10    289.21 o 
  -7  13   4      299.40      227.98    189.61 o 
  -6  13   4     5698.21     6336.93    283.48 o 
  -5  13   4        0.84      -93.75    166.13 o 
  -4  13   4     5438.64     5542.16    263.49 o 
  -3  13   4     3406.49     3555.24    398.80 o 
  -2  13   4     2863.07     2589.93    219.70 o 
  -1  13   4       97.63      100.98    152.38 o 
   0  13   4     4321.27     4420.68    227.37 o 
   1  13   4        8.14      -85.35    148.73 o 
   2  13   4     1014.70      784.34    168.81 o 
   3  13   4      159.54       37.70    156.29 o 
   4  13   4     1548.32     1187.19    199.07 o 
   5  13   4       96.93       59.24    184.57 o 
   6  13   4     1690.69     1117.61    201.51 o 
   7  13   4      472.66      129.36    221.61 o 
   8  13   4     1325.73      705.93    204.03 o 
   9  13   4       23.87      -48.62    193.85 o 
  10  13   4      513.66      234.97    266.55 o 
 -10  14   4     3466.55     2891.08    281.17 o 
  -9  14   4     1374.28     1279.37    240.85 o 
  -8  14   4     3348.42     2838.82    340.77 o 
  -7  14   4     2153.34     2289.49    231.14 o 
  -6  14   4     2566.45     2377.57    228.67 o 
  -5  14   4     3191.52     2755.92    248.04 o 
  -4  14   4     1582.94      995.00    206.80 o 
  -3  14   4     2599.42     2646.55    237.55 o 
  -2  14   4     4712.23     4868.55    272.07 o 
  -1  14   4     5606.75     6006.91    303.02 o 
   0  14   4     3331.28     3067.94    239.18 o 
   1  14   4     5477.09     5725.48    275.71 o 
   2  14   4     1459.48     1313.69    201.19 o 
   3  14   4     5288.91     5281.90    272.77 o 
   4  14   4     1726.54     1446.21    222.64 o 
   5  14   4     5610.57     6296.71    292.75 o 
   6  14   4     2985.23     3182.51    357.14 o 
   7  14   4     2363.04     2651.84    277.17 o 
  -5  15   4     1744.52     1362.99    271.67 o 
  -4  15   4      111.04     -194.55    194.55 o 
  -3  15   4      713.29      215.00    210.09 o 
  -2  15   4      255.64      291.35    278.49 o 
  -1  15   4     1387.77     1414.31    236.21 o 
   0  15   4       73.12     -197.89    197.89 o 
   1  15   4     1454.80     1433.34    222.04 o 
   2  15   4       24.55     -184.03    184.03 o 
 -23   0   5     2330.16     2037.79    372.82 o 
 -21   0   5     3812.14     4110.76    496.09 o 
 -19   0   5      889.07     1033.78    387.82 o 
 -17   0   5    17222.34    16445.07    782.77 o 
 -15   0   5     5753.78     5148.42    225.26 o 
 -13   0   5    14549.11    13110.58    267.94 o 
 -11   0   5    27878.97    25687.64    380.28 o 
  -9   0   5    33812.77    32150.80    428.77 o 
  -7   0   5   154014.16   147610.94   1547.13 o 
  -5   0   5     2026.20     1924.63     81.09 o 
  -3   0   5    57515.30    58747.48    831.53 o 
  -1   0   5    10469.56    11137.79    201.69 o 
   1   0   5     1928.78     2449.55    126.17 o 
   3   0   5    35032.40    39096.89    536.33 o 
   5   0   5    19165.26    21380.14    326.13 o 
   7   0   5     3665.03     4844.31    169.66 o 
   9   0   5    17288.46    18191.78    327.54 o 
  11   0   5    12159.37    12425.22    320.03 o 
  13   0   5    17983.63    18590.44    422.98 o 
  15   0   5    22723.65    21521.49    488.90 o 
  17   0   5     6230.20     6006.71    356.73 o 
  19   0   5     5628.34     5437.70    435.70 o 
  21   0   5     3269.66     2443.39    397.05 o 
 -24   1   5     1575.15     1163.93    242.60 o 
 -23   1   5     2006.30     1350.56    290.93 o 
 -22   1   5     2559.44     2355.50    261.59 o 
 -21   1   5     3792.46     3808.98    294.11 o 
 -20   1   5     5733.67     6115.09    308.96 o 
 -19   1   5     7523.84     7820.05    323.24 o 
 -18   1   5     4227.73     4635.21    247.82 o 
 -17   1   5    16223.93    16031.05    403.91 o 
 -16   1   5     7755.12     8117.14    233.74 o 
 -15   1   5    11806.62    11463.62    229.70 o 
 -14   1   5     4626.61     5142.29    166.46 o 
 -13   1   5     6928.22     6839.14    147.31 o 
 -12   1   5     5374.44     5499.86    128.18 o 
 -11   1   5    15746.41    15655.27    196.85 o 
 -10   1   5    37043.96    37062.39    343.79 o 
  -9   1   5    41590.70    44511.17    404.08 o 
  -8   1   5     2082.89     2617.13    120.20 o 
  -7   1   5    20729.66    21438.28    224.47 o 
  -6   1   5    44716.14    44137.16    389.35 o 
  -5   1   5    35675.31    35796.93    318.49 o 
  -4   1   5      262.30      287.01     39.84 o 
  -3   1   5     2772.20     3076.86     65.63 o 
  -2   1   5    20748.60    19842.28    190.13 o 
  -1   1   5     7567.31     7212.19     90.75 o 
   0   1   5    17270.15    16837.59    165.83 o 
   1   1   5    43035.55    47928.70    382.04 o 
   2   1   5    37747.70    37911.60    315.35 o 
   3   1   5     2700.29     2671.67     69.39 o 
   4   1   5     5337.11     4448.80     92.16 o 
   5   1   5    13349.88    12937.28    172.30 o 
   6   1   5    32404.35    31946.18    319.33 o 
   7   1   5    12645.70    11612.53    170.46 o 
   8   1   5    12074.90    11216.29    172.08 o 
   9   1   5    24282.57    22972.53    271.65 o 
  10   1   5    17263.80    16778.43    241.63 o 
  11   1   5    29916.67    28435.69    367.25 o 
  12   1   5     2774.47     2795.19    145.55 o 
  13   1   5     5875.79     6002.63    191.65 o 
  14   1   5     2281.81     2358.09    153.25 o 
  15   1   5     7001.63     7356.56    222.41 o 
  16   1   5     9696.38     9990.54    329.29 o 
  17   1   5     9196.02     9312.63    290.07 o 
  18   1   5     2882.17     3004.66    230.81 o 
  19   1   5     4486.82     4459.59    294.13 o 
  20   1   5     7292.82     7861.27    396.50 o 
  21   1   5     5162.95     5992.05    337.02 o 
 -23   2   5      132.71      433.75    262.02 o 
 -22   2   5     6612.01     7062.91    380.81 o 
 -21   2   5      170.51      225.66    263.12 o 
 -20   2   5     2146.12     2218.48    293.64 o 
 -19   2   5       50.14      143.62    170.42 o 
 -18   2   5     6618.24     6895.75    236.89 o 
 -17   2   5     2073.77     2001.93    162.92 o 
 -16   2   5    12114.85    12073.25    269.08 o 
 -15   2   5      965.73      816.52    131.53 o 
 -14   2   5     2946.20     2489.93    142.09 o 
 -13   2   5      998.33      521.87     95.36 o 
 -12   2   5    38982.43    35952.39    361.71 o 
 -11   2   5      213.14      -24.62     63.69 o 
 -10   2   5     6007.44     4957.10    113.79 o 
  -9   2   5     8892.15     8609.02    137.11 o 
  -8   2   5    29991.90    28365.73    269.08 o 
  -7   2   5     4931.56     5444.77    112.23 o 
  -6   2   5    21600.21    19573.85    226.23 o 
  -5   2   5     5976.70     5398.12     98.19 o 
  -4   2   5     5948.33     5813.15     86.49 o 
  -3   2   5     4165.81     3953.59     64.17 o 
  -2   2   5    23736.72    24726.20    229.12 o 
  -1   2   5     3463.19     3053.67     60.46 o 
   0   2   5    34297.63    36280.60    308.71 o 
   1   2   5     2132.77     1966.31     82.88 o 
   2   2   5    43301.82    48651.62    411.60 o 
   3   2   5        6.27      150.01     38.27 o 
   4   2   5    27481.30    29581.32    269.66 o 
   5   2   5     2783.06     3061.69     88.26 o 
   6   2   5    18723.77    20618.81    221.09 o 
   7   2   5     1027.93     1251.05     75.18 o 
   8   2   5     3289.29     3967.13    107.81 o 
   9   2   5      183.71      130.48     74.41 o 
  10   2   5     7655.70     8337.48    172.08 o 
  11   2   5      166.60       49.39     91.23 o 
  12   2   5     4281.66     4697.45    170.90 o 
  13   2   5     1142.44      964.43    125.38 o 
  14   2   5     7111.70     7171.50    242.76 o 
  15   2   5      328.60      373.72    156.76 o 
  16   2   5     3691.17     3595.67    209.96 o 
  17   2   5      281.96      -99.20    157.72 o 
  18   2   5     3869.13     3409.01    249.40 o 
  19   2   5        8.77     -151.95    151.95 o 
  20   2   5     2525.11     2488.79    237.94 o 
 -23   3   5     2840.62     2602.14    296.21 o 
 -22   3   5     5109.90     4886.87    334.94 o 
 -21   3   5     1911.66     1770.78    260.74 o 
 -20   3   5     2645.72     2546.99    274.04 o 
 -19   3   5     1941.43     1742.09    179.45 o 
 -18   3   5    12415.22    11640.68    298.00 o 
 -17   3   5      276.73      267.92    141.68 o 
 -16   3   5     5164.31     5580.28    254.15 o 
 -15   3   5     3061.22     3324.79    172.45 o 
 -14   3   5    15522.51    15466.82    281.54 o 
 -13   3   5     3583.96     3880.31    150.58 o 
 -12   3   5    17362.57    17357.82    329.43 o 
 -11   3   5    15879.85    15170.44    206.38 o 
 -10   3   5    17971.96    18196.56    212.70 o 
  -9   3   5     4195.15     4594.62    136.23 o 
  -8   3   5    28212.14    28065.88    305.85 o 
  -7   3   5    12528.18    12648.50    186.87 o 
  -6   3   5    12953.27    13737.81    195.23 o 
  -5   3   5    14417.80    12899.54    174.00 o 
  -4   3   5    30096.12    30082.54    279.38 o 
  -3   3   5      316.48      606.60     59.35 o 
  -2   3   5    15435.40    15636.42    170.59 o 
  -1   3   5    69109.95    68293.45    822.02 o 
   0   3   5    45009.63    45637.11    452.58 o 
   1   3   5     8823.20     7604.37    116.33 o 
   2   3   5     3210.67     3313.11     83.48 o 
   3   3   5     9161.61     8293.57    115.29 o 
   4   3   5    25667.15    25409.26    257.32 o 
   5   3   5    19292.52    18575.24    214.00 o 
   6   3   5    18789.89    19007.23    197.89 o 
   7   3   5     8044.87     7848.78    127.67 o 
   8   3   5    27086.29    26171.45    273.82 o 
   9   3   5     5340.73     5480.00    135.27 o 
  10   3   5    26791.58    24637.39    295.32 o 
  11   3   5     8260.26     8224.71    182.17 o 
  12   3   5    13504.53    12652.62    240.10 o 
  13   3   5     1175.66     1247.03    152.76 o 
  14   3   5     6063.32     6153.52    232.13 o 
  15   3   5     5269.49     5632.92    233.28 o 
  16   3   5     7815.81     7972.72    270.29 o 
  17   3   5     1249.55     1378.32    194.47 o 
  18   3   5     3200.74     3562.31    216.02 o 
  19   3   5     1673.42     1369.30    187.60 o 
  20   3   5     4577.63     5040.42    250.72 o 
 -23   4   5     3988.38     4340.52    333.40 o 
 -22   4   5      517.74      -51.90    216.99 o 
 -21   4   5     6073.97     6642.76    349.58 o 
 -20   4   5      147.99      -52.47    152.66 o 
 -19   4   5     5493.89     6380.35    256.43 o 
 -18   4   5       43.31       -1.48    144.94 o 
 -17   4   5    16364.94    15921.20    335.29 o 
 -16   4   5      110.42       93.91    127.44 o 
 -15   4   5     8095.05     8044.44    244.02 o 
 -14   4   5      738.28      397.68    117.98 o 
 -13   4   5    13595.08    13121.83    251.60 o 
 -12   4   5      115.70       50.03     95.01 o 
 -11   4   5    12181.83    12039.04    221.73 o 
 -10   4   5     4377.87     4187.07    139.66 o 
  -9   4   5    14374.04    13641.33    206.56 o 
  -8   4   5     6277.98     6472.11    147.65 o 
  -7   4   5     6685.28     6067.22    138.41 o 
  -6   4   5    13132.10    13760.22    185.58 o 
  -5   4   5    30645.23    28486.90    296.04 o 
  -4   4   5     6460.06     6794.35    123.11 o 
  -3   4   5     7980.18     7761.87    146.95 o 
  -2   4   5       25.10      317.61     64.35 o 
  -1   4   5    42983.04    41976.59    629.16 o 
   0   4   5     1378.64     1978.88     80.32 o 
   1   4   5    18332.34    19157.27    224.25 o 
   2   4   5     5359.45     6628.31    152.86 o 
   3   4   5    14434.44    14194.22    162.27 o 
   4   4   5     1420.28     2054.86    100.83 o 
   5   4   5    11679.09    11540.99    159.74 o 
   6   4   5      158.25       91.96     60.45 o 
   7   4   5    16978.29    17627.33    230.01 o 
   8   4   5      935.44     1028.22     70.07 o 
   9   4   5    14008.04    14453.39    189.83 o 
  10   4   5      225.68      121.23     85.56 o 
  11   4   5    11570.84    11329.25    234.85 o 
  12   4   5     4907.86     5028.15    216.70 o 
  13   4   5     6467.19     6883.54    214.52 o 
  14   4   5      305.14      472.50    135.26 o 
  15   4   5     2276.33     1826.26    281.23 o 
  16   4   5      664.23      614.30    161.90 o 
  17   4   5     5588.62     5310.33    242.72 o 
  18   4   5     1725.26     1339.01    190.27 o 
  19   4   5      842.12      542.14    182.35 o 
  20   4   5      263.70       74.58    181.24 o 
 -22   5   5     1612.88     2051.69    253.68 o 
 -21   5   5     2534.28     2503.83    226.10 o 
 -20   5   5      323.05      344.62    180.20 o 
 -19   5   5     6334.13     5669.99    273.11 o 
 -18   5   5      479.17      391.99    152.22 o 
 -17   5   5     8778.43     8390.25    263.70 o 
 -16   5   5     4196.45     4334.70    275.94 o 
 -15   5   5     6492.09     6893.20    220.15 o 
 -14   5   5      429.98      306.07    120.67 o 
 -13   5   5    17359.81    17245.81    292.34 o 
 -12   5   5     4112.13     4044.47    158.10 o 
 -11   5   5    12688.04    13223.43    233.57 o 
 -10   5   5     7480.99     7224.18    169.06 o 
  -9   5   5    23629.64    23378.84    305.86 o 
  -8   5   5     5454.15     5236.30    136.43 o 
  -7   5   5    26137.30    25993.79    292.05 o 
  -6   5   5    21908.95    21210.95    262.84 o 
  -5   5   5    23463.13    23168.46    225.87 o 
  -4   5   5     6250.98     5099.18    156.09 o 
  -3   5   5    22034.64    20920.95    235.39 o 
  -2   5   5      208.78       79.25     76.10 o 
  -1   5   5    46905.31    47309.54    493.45 o 
   0   5   5    42533.54    42448.53    443.87 o 
   1   5   5    40936.45    41030.24    435.84 o 
   2   5   5    16699.04    16851.11    215.33 o 
   3   5   5    46826.78    47956.02    478.18 o 
   4   5   5    24027.59    22854.82    241.32 o 
   5   5   5    30078.74    29929.70    301.86 o 
   6   5   5     2779.57     2525.63     97.67 o 
   7   5   5    17716.66    17477.55    245.13 o 
   8   5   5      705.81      583.72     87.78 o 
   9   5   5    11564.73    11189.33    237.66 o 
  10   5   5     2081.50     2436.69    153.63 o 
  11   5   5     6680.14     7026.25    220.91 o 
  12   5   5     2909.04     3263.24    194.12 o 
  13   5   5     5782.98     5998.07    199.88 o 
  14   5   5     1337.62     1742.95    150.11 o 
  15   5   5     4168.92     4206.20    188.87 o 
  16   5   5     2985.22     3526.79    199.60 o 
  17   5   5     5154.71     5488.73    233.61 o 
  18   5   5     1555.98     1865.06    188.24 o 
  19   5   5     4513.72     5024.69    245.67 o 
 -22   6   5     5604.26     6169.45    301.55 o 
 -21   6   5     1415.21     1202.43    204.13 o 
 -20   6   5     2301.34     2083.03    221.29 o 
 -19   6   5      827.24      365.88    220.29 o 
 -18   6   5    10044.14    10409.49    359.52 o 
 -17   6   5      121.36      264.53    147.99 o 
 -16   6   5     5343.02     5893.01    291.93 o 
 -15   6   5      141.16      -20.77    126.39 o 
 -14   6   5     4147.22     4434.62    197.66 o 
 -13   6   5      450.55      341.96    122.82 o 
 -12   6   5     3544.25     3924.72    171.89 o 
 -11   6   5       24.89      -96.43     96.43 o 
 -10   6   5    16432.08    16713.22    277.17 o 
  -9   6   5     2461.03     2713.14    127.42 o 
  -8   6   5     5104.25     4852.19    136.54 o 
  -7   6   5       30.26       68.37     58.34 o 
  -6   6   5    14864.80    13999.19    193.12 o 
  -5   6   5     3937.84     4491.70    143.03 o 
  -4   6   5    17794.81    17539.45    202.61 o 
  -3   6   5     1525.31     1687.11     72.55 o 
  -2   6   5     8336.58     8121.29    176.48 o 
  -1   6   5     1339.72     1233.33     77.04 o 
   0   6   5    35453.95    36648.32    377.70 o 
   1   6   5     2201.43     2488.70    100.70 o 
   2   6   5    18358.12    18621.39    248.00 o 
   3   6   5      104.80      150.35     72.92 o 
   4   6   5    28075.43    27293.08    334.06 o 
   5   6   5       46.43       77.00     75.57 o 
   6   6   5    11168.02    11248.40    196.81 o 
   7   6   5     7112.86     7238.38    167.21 o 
   8   6   5     9637.93     9322.17    213.12 o 
   9   6   5     1760.58     1692.16    197.56 o 
  10   6   5     2087.98     2282.59    153.86 o 
  11   6   5     2097.34     1961.27    157.81 o 
  12   6   5    10606.11    10811.70    305.08 o 
  13   6   5     1703.78     1092.80    159.43 o 
  14   6   5     4801.46     4659.01    225.28 o 
  15   6   5      311.04     -101.78    159.34 o 
  16   6   5     7898.18     7769.93    286.77 o 
  17   6   5      262.88      106.49    177.18 o 
  18   6   5      760.34      622.12    208.30 o 
  19   6   5      360.64      197.24    213.28 o 
 -21   7   5      746.53      810.30    197.80 o 
 -20   7   5     4522.31     4026.68    243.60 o 
 -19   7   5      361.37      410.60    174.40 o 
 -18   7   5     7027.53     6778.68    269.01 o 
 -17   7   5     1297.08     1321.84    164.63 o 
 -16   7   5     4484.94     4231.29    257.64 o 
 -15   7   5      731.08      355.61    129.55 o 
 -14   7   5     3643.17     3511.34    174.61 o 
 -13   7   5     5794.25     5766.26    250.92 o 
 -12   7   5     5699.47     6020.58    194.28 o 
 -11   7   5     4559.52     4514.90    207.26 o 
 -10   7   5    13295.69    13614.72    247.87 o 
  -9   7   5     4335.42     4007.94    144.39 o 
  -8   7   5    13593.97    13849.01    212.80 o 
  -7   7   5     3227.93     2976.43    110.50 o 
  -6   7   5    29374.15    30434.77    413.29 o 
  -5   7   5     5044.49     4594.26    192.55 o 
  -4   7   5    15137.21    14826.35    210.97 o 
  -3   7   5       92.76      -52.24     52.24 o 
  -2   7   5    34101.58    32507.51    329.45 o 
  -1   7   5     1961.49     1901.82     88.75 o 
   0   7   5    32036.36    32314.44    342.41 o 
   1   7   5     7632.84     7647.49    146.43 o 
   2   7   5    33682.47    32539.98    359.90 o 
   3   7   5     7066.02     7557.75    152.72 o 
   4   7   5    11173.74    10671.87    186.08 o 
   5   7   5    15332.92    15843.21    211.69 o 
   6   7   5     7453.25     7330.78    173.14 o 
   7   7   5      390.25      682.19    103.72 o 
   8   7   5     7382.09     7809.31    197.27 o 
   9   7   5     3251.08     4182.54    169.12 o 
  10   7   5    11871.36    12133.42    252.78 o 
  11   7   5     2487.30     3177.72    170.13 o 
  12   7   5    14866.15    14560.17    312.56 o 
  13   7   5     3038.47     4059.72    281.94 o 
  14   7   5     5015.15     5287.11    239.36 o 
  15   7   5     1443.90     1827.12    215.85 o 
  16   7   5     3358.89     3623.78    233.21 o 
  17   7   5     3257.38     3774.34    245.20 o 
  18   7   5     5571.56     5809.63    284.09 o 
 -20   8   5      923.30      958.03    180.01 o 
 -19   8   5     2800.79     3135.11    207.12 o 
 -18   8   5       26.49      -75.10    159.26 o 
 -17   8   5     7465.34     8269.38    261.59 o 
 -16   8   5      356.23      172.66    129.74 o 
 -15   8   5     9408.37     9771.47    253.43 o 
 -14   8   5      140.24      -14.70    112.87 o 
 -13   8   5    10816.00    11105.52    242.14 o 
 -12   8   5      129.35       37.26     99.88 o 
 -11   8   5     8922.55     9370.34    267.54 o 
 -10   8   5      792.68      798.73    132.56 o 
  -9   8   5     3226.62     3111.75    158.31 o 
  -8   8   5     3013.41     3109.53    162.02 o 
  -7   8   5     3249.95     3632.01    183.68 o 
  -6   8   5     2626.75     3193.73    168.94 o 
  -5   8   5     8404.69     8041.12    157.14 o 
  -4   8   5     9798.83     9987.96    188.13 o 
  -3   8   5    12040.40    11295.27    172.14 o 
  -2   8   5      142.56      125.54     58.50 o 
  -1   8   5     4994.39     4942.02    124.82 o 
   0   8   5      131.50      -26.63     77.74 o 
   1   8   5     6296.82     6236.99    230.88 o 
   2   8   5     1860.57     2126.12    115.43 o 
   3   8   5     3633.39     3767.89    140.38 o 
   4   8   5     7092.00     7237.51    177.18 o 
   5   8   5     7325.92     7156.96    177.76 o 
   6   8   5     4347.09     4149.09    184.51 o 
   7   8   5     3391.66     3464.58    148.10 o 
   8   8   5     7583.68     7576.75    198.72 o 
   9   8   5     2099.52     2276.26    147.39 o 
  10   8   5     2322.50     2189.19    155.10 o 
  11   8   5     5025.29     5133.01    200.27 o 
  12   8   5     2346.80     1874.44    166.25 o 
  13   8   5     1713.71     1833.50    178.14 o 
  14   8   5     2842.05     2396.39    212.01 o 
  15   8   5     3116.94     3143.02    241.13 o 
  16   8   5       66.28      100.08    179.20 o 
  17   8   5     2065.74     2064.89    233.41 o 
 -19   9   5     8079.51     8568.13    367.29 o 
 -18   9   5      199.10       80.05    183.93 o 
 -17   9   5     3764.43     4113.21    251.19 o 
 -16   9   5      902.42      897.96    183.68 o 
 -15   9   5     4723.82     4737.85    281.43 o 
 -14   9   5     1630.35     1546.03    176.66 o 
 -13   9   5     8155.90     8029.58    264.35 o 
 -12   9   5     2973.71     3246.82    190.91 o 
 -11   9   5    19071.33    18234.90    348.65 o 
 -10   9   5     1842.02     1586.38    142.35 o 
  -9   9   5    11778.53    11523.22    303.21 o 
  -8   9   5     1941.58     1774.54    169.59 o 
  -7   9   5    11449.63    11697.04    324.94 o 
  -6   9   5      240.44      288.77    127.86 o 
  -5   9   5     7382.06     7715.63    230.88 o 
  -4   9   5      661.27      385.11    121.45 o 
  -3   9   5    13546.03    13088.65    279.22 o 
  -2   9   5       46.25      -58.85     72.82 o 
  -1   9   5    15620.81    15203.87    221.82 o 
   0   9   5      596.33      613.13     93.42 o 
   1   9   5     7638.45     7324.33    170.39 o 
   2   9   5      219.78      260.03     95.85 o 
   3   9   5    25218.14    25636.28    369.32 o 
   4   9   5      752.61      811.81    115.66 o 
   5   9   5     2771.71     3255.93    155.05 o 
   6   9   5     3199.51     3472.37    172.89 o 
   7   9   5    10228.06    10611.83    254.32 o 
   8   9   5     6278.84     6767.60    227.88 o 
   9   9   5     5444.99     5893.75    223.34 o 
  10   9   5     2322.54     2947.21    190.21 o 
  11   9   5    13361.70    13466.83    357.57 o 
  12   9   5      819.26     1071.11    176.12 o 
  13   9   5     5933.45     6838.13    301.95 o 
  14   9   5     1591.45     2410.98    233.50 o 
  15   9   5     7592.06     8721.67    358.62 o 
  16   9   5      870.17      960.40    220.28 o 
 -18  10   5     1076.40      980.02    223.73 o 
 -17  10   5     1381.46     1174.82    203.02 o 
 -16  10   5     2100.37     2314.31    214.83 o 
 -15  10   5     1085.07     1049.24    184.02 o 
 -14  10   5     4802.59     5454.58    246.80 o 
 -13  10   5      741.98      872.55    163.60 o 
 -12  10   5    10964.64    11824.53    290.19 o 
 -11  10   5     2554.98     2663.47    186.62 o 
 -10  10   5     8158.09     8973.82    296.66 o 
  -9  10   5     1374.46     1533.93    179.68 o 
  -8  10   5     9011.34     9333.85    279.45 o 
  -7  10   5     3218.06     3351.72    202.22 o 
  -6  10   5     2309.74     2523.04    288.51 o 
  -5  10   5     5973.95     6230.24    243.83 o 
  -4  10   5     9438.57     9453.88    253.20 o 
  -3  10   5     1604.87     1597.46    152.89 o 
  -2  10   5     7328.29     7203.79    213.11 o 
  -1  10   5      587.92      667.89    132.09 o 
   0  10   5     5287.05     4982.48    170.59 o 
   1  10   5     1390.86     1294.52    125.48 o 
   2  10   5     7882.00     7804.55    225.60 o 
   3  10   5     1291.87     1218.02    154.48 o 
   4  10   5     3506.74     3697.50    164.99 o 
   5  10   5     4290.50     4175.09    200.12 o 
   6  10   5     7137.21     7241.44    291.64 o 
   7  10   5      993.69      887.15    138.22 o 
   8  10   5     2125.73     1540.77    158.90 o 
   9  10   5     3502.42     2900.44    210.63 o 
  10  10   5     2039.13     1849.70    176.95 o 
  11  10   5     1602.86     1298.68    175.97 o 
  12  10   5      396.87      266.99    167.77 o 
  13  10   5     8717.09     7680.56    313.11 o 
  14  10   5      803.69      490.90    195.52 o 
  15  10   5      598.28       80.54    198.59 o 
 -17  11   5       70.95      -99.83    359.01 o 
 -16  11   5     3724.90     3429.37    238.39 o 
 -15  11   5      111.79      -67.09    165.91 o 
 -14  11   5     9866.67    10365.15    402.09 o 
 -13  11   5       57.55     -185.29    185.29 o 
 -12  11   5     8969.38     9694.43    370.59 o 
 -11  11   5       85.38      126.13    187.40 o 
 -10  11   5     6188.49     6155.88    300.39 o 
  -9  11   5      720.23      681.45    230.29 o 
  -8  11   5    12854.29    12638.89    358.78 o 
  -7  11   5      430.60      177.97    168.36 o 
  -6  11   5     5871.69     5788.59    265.40 o 
  -5  11   5       60.98      174.60    156.08 o 
  -4  11   5     6449.99     6631.21    245.58 o 
  -3  11   5      852.78      672.75    145.15 o 
  -2  11   5     9448.84     9121.31    245.67 o 
  -1  11   5      133.67      -47.66    119.71 o 
   0  11   5     6310.92     6641.90    308.09 o 
   1  11   5      482.94      404.35    133.55 o 
   2  11   5     8175.12     8288.07    262.45 o 
   3  11   5      199.26      201.11    112.81 o 
   4  11   5    14455.87    15329.85    331.67 o 
   5  11   5       13.57       52.69    117.03 o 
   6  11   5     8285.51     8567.90    240.53 o 
   7  11   5     1783.84     1960.50    166.56 o 
   8  11   5    13681.48    13943.42    334.64 o 
   9  11   5      485.57      374.04    146.76 o 
  10  11   5     8480.47     9009.11    279.57 o 
  11  11   5       67.02      -10.28    157.13 o 
  12  11   5     6332.14     6965.29    279.10 o 
  13  11   5       97.42     -177.28    177.28 o 
  14  11   5     6787.12     7999.96    476.63 o 
 -15  12   5     2210.46     2510.87    294.98 o 
 -14  12   5     1289.93     1368.67    258.59 o 
 -13  12   5     2863.74     3163.45    517.13 o 
 -12  12   5      298.72      322.37    232.45 o 
 -11  12   5     1912.37     1924.45    245.06 o 
 -10  12   5     2776.87     2525.65    250.02 o 
  -9  12   5     3065.39     3878.41    271.64 o 
  -8  12   5     1641.86     1347.23    209.35 o 
  -7  12   5     2346.16     2315.83    274.86 o 
  -6  12   5     1832.58     1502.69    199.87 o 
  -5  12   5     1879.91     2244.31    194.57 o 
  -4  12   5     1192.71      768.66    227.62 o 
  -3  12   5     5911.85     5836.84    248.98 o 
  -2  12   5     3428.70     3226.14    200.41 o 
  -1  12   5     2170.44     2259.05    177.76 o 
   0  12   5     4220.32     3953.99    206.72 o 
   1  12   5     8980.11     8075.25    315.78 o 
   2  12   5     1178.40     1116.56    184.39 o 
   3  12   5     1954.87     1671.64    169.31 o 
   4  12   5     2728.30     2811.73    205.19 o 
   5  12   5     1011.66      888.14    142.30 o 
   6  12   5       90.65      -98.27    133.47 o 
   7  12   5     1356.54     1029.10    214.90 o 
   8  12   5     1510.93     1030.40    270.64 o 
   9  12   5      756.45      410.89    166.54 o 
  10  12   5       58.59     -161.64    161.64 o 
  11  12   5     1170.24      811.34    190.73 o 
  12  12   5     1103.42      784.20    254.90 o 
 -13  13   5     6066.39     5970.19    354.37 o 
 -12  13   5      138.12     -216.65    216.65 o 
 -11  13   5     3959.65     3753.36    322.91 o 
 -10  13   5        0.97     -194.75    194.75 o 
  -9  13   5     7536.49     7391.34    343.04 o 
  -8  13   5       47.57     -184.61    184.61 o 
  -7  13   5     6796.83     6722.65    314.75 o 
  -6  13   5      594.44      450.35    234.74 o 
  -5  13   5     4438.57     4412.79    245.47 o 
  -4  13   5      408.58      217.66    162.58 o 
  -3  13   5     5361.56     5560.92    297.90 o 
  -2  13   5      837.53      409.26    165.94 o 
  -1  13   5     4793.23     5028.41    249.89 o 
   0  13   5       19.47     -143.12    143.12 o 
   1  13   5     8350.37     8925.62    299.01 o 
   2  13   5      131.31     -151.57    151.57 o 
   3  13   5     9168.88     9198.26    307.75 o 
   4  13   5      371.41      155.24    167.49 o 
   5  13   5     7334.49     7773.52    284.74 o 
   6  13   5      456.22     -153.33    277.26 o 
   7  13   5     5737.62     5972.88    373.95 o 
   8  13   5        4.40     -143.47    162.65 o 
   9  13   5     7768.78     8942.74    507.20 o 
  10  13   5       40.83     -167.35    167.35 o 
 -10  14   5     1769.72     2036.08    308.45 o 
  -9  14   5     3129.26     3321.83    404.52 o 
  -8  14   5      363.09      244.89    282.13 o 
  -7  14   5     4762.60     4958.81    334.70 o 
  -6  14   5     1298.70     1708.54    221.22 o 
  -5  14   5     4244.99     4462.93    277.26 o 
  -4  14   5      733.44      336.78    191.45 o 
  -3  14   5      738.17      200.91    186.94 o 
  -2  14   5      672.30      598.69    188.70 o 
  -1  14   5     2220.19     2113.95    342.25 o 
   0  14   5     1722.64     1377.74    221.66 o 
   1  14   5      158.42     -170.45    170.45 o 
   2  14   5     2523.95     1968.69    336.87 o 
   3  14   5     1996.59     1439.27    202.18 o 
   4  14   5     1793.76     1753.45    208.52 o 
   5  14   5      703.62      313.26    184.65 o 
   6  14   5     1184.56      814.24    299.24 o 
   7  14   5     1399.80      855.16    260.72 o 
  -4  15   5     6187.65     6160.28    324.36 o 
  -3  15   5       64.22      -80.57    200.10 o 
  -2  15   5     7834.02     8395.85    341.36 o 
  -1  15   5        3.09     -116.57    201.52 o 
   0  15   5     6661.50     6909.71    336.47 o 
   1  15   5        7.82     -204.77    204.77 o 
   2  15   5     3953.35     5068.13    916.38 o 
 -24   0   6     4532.77     3931.87    436.99 o 
 -22   0   6     7234.38     6684.00    474.03 o 
 -20   0   6    15412.32    14020.88    566.27 o 
 -18   0   6    12858.96    13099.23    723.10 o 
 -16   0   6    10820.38    10856.46    336.58 o 
 -14   0   6     7963.85     8608.22    249.40 o 
 -12   0   6    21487.42    21973.68    350.74 o 
 -10   0   6    23590.12    24653.16    555.03 o 
  -8   0   6   125951.30   126698.84   1352.13 o 
  -6   0   6    46353.59    47335.14    544.54 o 
  -4   0   6    52305.43    57231.25    735.42 o 
  -2   0   6      843.38      775.24    106.48 o 
   0   0   6    66359.51    69663.24    868.17 o 
   2   0   6    14876.89    13374.63    230.48 o 
   4   0   6    41162.33    39431.72    564.10 o 
   6   0   6    39457.09    37031.10    508.06 o 
   8   0   6    35888.45    34458.20    501.98 o 
  10   0   6    22411.43    21246.78    423.88 o 
  12   0   6    35279.11    35538.64    688.31 o 
  14   0   6    14594.87    14981.15    393.18 o 
  16   0   6    11448.94    11179.75    377.01 o 
  18   0   6    13493.27    14335.82    580.35 o 
  20   0   6     2546.64     2659.94    381.67 o 
 -24   1   6     2205.58     2604.16    276.22 o 
 -23   1   6     1131.83     1631.76    247.93 o 
 -22   1   6     2504.58     2939.33    283.21 o 
 -21   1   6     4825.01     5305.48    303.99 o 
 -20   1   6     6105.41     5983.92    306.48 o 
 -19   1   6     2460.75     2457.08    234.40 o 
 -18   1   6     1334.97     1263.75    178.78 o 
 -17   1   6     6492.20     6304.49    222.09 o 
 -16   1   6    12799.50    12280.40    267.19 o 
 -15   1   6     5598.36     5978.79    255.22 o 
 -14   1   6    16198.41    15338.97    222.36 o 
 -13   1   6    10962.34    10543.00    176.69 o 
 -12   1   6    23509.40    22642.35    253.69 o 
 -11   1   6    10284.80     9555.98    152.17 o 
 -10   1   6    47677.58    44798.25    398.35 o 
  -9   1   6    20059.62    17324.14    201.20 o 
  -8   1   6    26149.15    25405.84    249.51 o 
  -7   1   6    11532.95    11648.54    143.88 o 
  -6   1   6    28554.93    29004.02    265.80 o 
  -5   1   6    32034.30    31841.02    290.44 o 
  -4   1   6    12246.53    12790.61    139.61 o 
  -3   1   6      793.47      811.89     42.36 o 
  -2   1   6      960.66     1270.19     68.25 o 
  -1   1   6     3905.52     3553.71     88.22 o 
   0   1   6     4688.30     4834.90     73.15 o 
   1   1   6    83321.02    87217.83    672.20 o 
   2   1   6     8090.42     9677.21    114.55 o 
   3   1   6     8498.07     9673.09    127.42 o 
   4   1   6     4957.33     5825.10    142.42 o 
   5   1   6    23681.80    25328.06    273.53 o 
   6   1   6     9000.06     9319.27    150.89 o 
   7   1   6    12214.38    13209.75    197.68 o 
   8   1   6    10596.12    10421.29    168.38 o 
   9   1   6     9819.73    10062.60    224.94 o 
  10   1   6     5862.41     6331.20    170.79 o 
  11   1   6     1565.99     2008.28    130.10 o 
  12   1   6    11752.02    10968.88    244.04 o 
  13   1   6    11294.80    11344.32    238.23 o 
  14   1   6    13681.34    12990.26    262.19 o 
  15   1   6      191.85        4.00    122.84 o 
  16   1   6     6626.38     6880.73    282.52 o 
  17   1   6     2953.04     2703.39    206.44 o 
  18   1   6     3970.95     3553.01    244.46 o 
  19   1   6     1229.45     1006.66    226.56 o 
  20   1   6     2605.90     2381.89    263.55 o 
 -24   2   6      450.72      543.69    257.87 o 
 -23   2   6     4904.87     4696.30    340.18 o 
 -22   2   6      848.29      342.12    223.86 o 
 -21   2   6     8318.38     7802.30    369.40 o 
 -20   2   6      787.33      637.54    250.58 o 
 -19   2   6     6930.81     7659.66    318.94 o 
 -18   2   6      694.56      619.50    156.01 o 
 -17   2   6     5673.37     6750.87    245.24 o 
 -16   2   6      489.14      113.99    123.89 o 
 -15   2   6     5687.10     6375.95    198.19 o 
 -14   2   6       11.25      -96.43     96.43 o 
 -13   2   6    20887.73    20941.72    281.31 o 
 -12   2   6     4764.01     5122.80    131.58 o 
 -11   2   6     9105.75     9360.99    149.71 o 
 -10   2   6     4083.94     4688.39    118.87 o 
  -9   2   6    12276.60    12220.48    163.35 o 
  -8   2   6      678.91      634.53     72.62 o 
  -7   2   6    15110.53    15237.76    177.58 o 
  -6   2   6      205.44      183.07     49.27 o 
  -5   2   6    18227.99    19064.20    193.35 o 
  -4   2   6     1199.59     1196.42     49.09 o 
  -3   2   6    61019.73    60794.08    478.22 o 
  -2   2   6      755.16      648.21     31.91 o 
  -1   2   6    41669.05    39977.84    312.30 o 
   0   2   6     4754.68     5651.79     77.16 o 
   1   2   6    42198.61    42292.51    349.00 o 
   2   2   6        6.84      113.65     34.82 o 
   3   2   6    18266.67    16956.41    172.28 o 
   4   2   6      821.20     1198.45     66.91 o 
   5   2   6    15269.57    14433.34    173.24 o 
   6   2   6     1566.22     2076.98     84.67 o 
   7   2   6    21270.61    19491.62    220.93 o 
   8   2   6      631.56      369.88     76.15 o 
   9   2   6    20543.89    18851.30    254.94 o 
  10   2   6      171.74      201.57     88.26 o 
  11   2   6    19370.21    18411.74    329.16 o 
  12   2   6     6349.46     6580.17    197.29 o 
  13   2   6    17479.53    16551.84    286.79 o 
  14   2   6       30.00     -133.11    133.11 o 
  15   2   6    10670.23    10515.21    285.03 o 
  16   2   6      498.62      491.08    178.42 o 
  17   2   6     7050.66     8437.50    289.75 o 
  18   2   6       87.29     -147.15    161.32 o 
  19   2   6     4180.41     4682.23    254.07 o 
  20   2   6       99.84      130.72    201.39 o 
 -23   3   6     2254.89     2732.60    294.39 o 
 -22   3   6     2871.96     3107.71    304.92 o 
 -21   3   6     3172.53     2922.05    281.20 o 
 -20   3   6     5126.05     5839.69    332.17 o 
 -19   3   6     5666.07     5814.92    249.25 o 
 -18   3   6     3350.28     3686.10    207.80 o 
 -17   3   6     7948.79     8198.48    261.57 o 
 -16   3   6     4997.44     5354.28    219.62 o 
 -15   3   6    11971.21    11479.33    253.57 o 
 -14   3   6     4493.93     5143.74    196.16 o 
 -13   3   6     9176.12     8597.88    208.59 o 
 -12   3   6     1906.00     1891.34    117.27 o 
 -11   3   6    24422.49    22833.64    300.89 o 
 -10   3   6     2291.60     1999.20     88.51 o 
  -9   3   6     5374.46     5251.24    134.01 o 
  -8   3   6     4884.73     4752.92    124.60 o 
  -7   3   6    21907.26    21707.73    260.34 o 
  -6   3   6     5165.02     4861.24    178.80 o 
  -5   3   6    22425.38    21896.81    215.67 o 
  -4   3   6    18945.73    17333.81    180.21 o 
  -3   3   6     5537.82     6198.91     99.80 o 
  -2   3   6    15745.87    14884.60    197.87 o 
  -1   3   6    23055.34    24937.00    244.94 o 
   0   3   6    33857.04    33549.23    332.33 o 
   1   3   6    31082.16    34216.32    360.73 o 
   2   3   6    27346.35    26753.93    246.45 o 
   3   3   6    26072.04    28549.01    267.27 o 
   4   3   6    13863.80    13241.56    169.07 o 
   5   3   6    14637.87    15885.59    196.18 o 
   6   3   6     4324.37     4115.89    190.75 o 
   7   3   6     7006.36     7191.92    125.36 o 
   8   3   6     8439.75     9248.21    155.78 o 
   9   3   6     8345.52     8329.91    161.37 o 
  10   3   6      852.23     1075.62    102.79 o 
  11   3   6     9351.71     8518.79    189.04 o 
  12   3   6     6410.82     6764.75    206.23 o 
  13   3   6     6647.22     6663.98    275.75 o 
  14   3   6      163.92      -97.72    133.55 o 
  15   3   6     3811.10     3634.28    232.50 o 
  16   3   6     1894.89     1620.10    207.90 o 
  17   3   6     2996.85     2587.17    201.97 o 
  18   3   6     1460.76     1377.80    190.97 o 
  19   3   6     3361.12     3022.01    211.62 o 
  20   3   6      796.77      419.08    181.64 o 
 -23   4   6     1106.41      929.61    268.18 o 
 -22   4   6     4652.15     4712.79    277.47 o 
 -21   4   6     1748.20     1347.88    193.31 o 
 -20   4   6     4847.06     4950.46    281.44 o 
 -19   4   6      663.54      406.79    158.56 o 
 -18   4   6     8556.14     8769.81    274.26 o 
 -17   4   6       74.65       73.15    139.30 o 
 -16   4   6     1184.09      991.91    196.29 o 
 -15   4   6      935.48      650.70    139.90 o 
 -14   4   6    32378.04    32837.82    443.47 o 
 -13   4   6     2523.49     2772.29    163.37 o 
 -12   4   6    14544.72    14802.05    257.31 o 
 -11   4   6     4030.83     4331.59    151.63 o 
 -10   4   6    25609.13    24596.36    325.45 o 
  -9   4   6     4676.86     5505.32    146.44 o 
  -8   4   6    21663.43    21041.17    262.07 o 
  -7   4   6     1853.62     2601.46     99.83 o 
  -6   4   6    26200.92    25371.58    279.70 o 
  -5   4   6     3442.23     4042.56    182.27 o 
  -4   4   6    23177.91    22034.55    259.48 o 
  -3   4   6      754.46      593.59     76.88 o 
  -2   4   6    45530.58    43943.61    480.53 o 
  -1   4   6    15495.06    16880.66    206.79 o 
   0   4   6    11074.66    10732.63    155.98 o 
   1   4   6     1022.70     1165.85     82.26 o 
   2   4   6    17927.38    17793.15    213.68 o 
   3   4   6      790.41      885.09     63.22 o 
   4   4   6    28291.93    27672.51    268.90 o 
   5   4   6     3068.23     3116.76     96.53 o 
   6   4   6    15479.30    14410.23    201.36 o 
   7   4   6     5056.11     5230.71    134.39 o 
   8   4   6    20745.38    19757.52    260.52 o 
   9   4   6     2217.03     2074.96     93.37 o 
  10   4   6     4324.86     4336.11    159.85 o 
  11   4   6     2634.22     2778.27    147.62 o 
  12   4   6     8766.79     9250.19    226.78 o 
  13   4   6      621.14      359.38    125.09 o 
  14   4   6     4867.53     6125.48    233.88 o 
  15   4   6       53.19      -64.27    137.80 o 
  16   4   6     9181.47    10124.57    309.97 o 
  17   4   6      897.26      729.28    169.62 o 
  18   4   6     4722.10     6017.45    285.40 o 
  19   4   6        8.23     -163.00    186.56 o 
 -22   5   6     2821.66     2668.23    244.10 o 
 -21   5   6     2164.14     2103.75    219.80 o 
 -20   5   6     6359.16     7164.35    298.48 o 
 -19   5   6     1648.81     1818.28    197.36 o 
 -18   5   6     8977.51     8732.70    292.52 o 
 -17   5   6     1300.41     1299.75    155.76 o 
 -16   5   6     8281.70     8186.52    289.75 o 
 -15   5   6     3121.66     3385.37    190.28 o 
 -14   5   6     4365.98     4659.57    184.68 o 
 -13   5   6     1204.27     1508.43    131.17 o 
 -12   5   6    13538.41    13564.39    257.91 o 
 -11   5   6     1167.33     1193.06    110.57 o 
 -10   5   6     7031.94     6912.75    167.85 o 
  -9   5   6      957.00      956.48    113.21 o 
  -8   5   6     5681.43     5296.85    180.94 o 
  -7   5   6     1969.18     1577.73     79.58 o 
  -6   5   6    20521.50    19365.45    254.21 o 
  -5   5   6    16080.81    15181.21    193.35 o 
  -4   5   6     7988.09     7917.02    163.52 o 
  -3   5   6    14521.36    13503.91    185.85 o 
  -2   5   6    15331.69    15305.06    227.24 o 
  -1   5   6    13818.91    13871.15    203.75 o 
   0   5   6    14333.38    14593.15    248.14 o 
   1   5   6     3406.06     3295.20    105.19 o 
   2   5   6    23186.02    24518.47    283.08 o 
   3   5   6     1636.19     1408.59     93.30 o 
   4   5   6    37179.45    36768.40    391.91 o 
   5   5   6     1584.77     1430.01     78.42 o 
   6   5   6    18020.95    18251.10    247.80 o 
   7   5   6    18716.49    18856.74    264.14 o 
   8   5   6    10126.07    10194.97    195.25 o 
   9   5   6      467.73      492.45    107.32 o 
  10   5   6    10280.73    10178.51    242.66 o 
  11   5   6     4431.09     4944.63    216.70 o 
  12   5   6     2896.41     2635.67    191.92 o 
  13   5   6      546.68      644.33    156.64 o 
  14   5   6     5596.23     5116.57    247.39 o 
  15   5   6      873.73     1039.42    156.03 o 
  16   5   6     3634.34     2985.20    227.26 o 
  17   5   6      447.48      502.21    153.65 o 
  18   5   6     4122.99     3529.14    210.59 o 
  19   5   6      100.05       17.76    162.68 o 
 -22   6   6      847.86      214.42    195.23 o 
 -21   6   6     1731.20     1108.69    204.30 o 
 -20   6   6      457.45       20.62    171.82 o 
 -19   6   6     4038.99     3520.82    227.53 o 
 -18   6   6      157.13     -149.40    149.40 o 
 -17   6   6     5732.03     5306.12    229.96 o 
 -16   6   6     1543.82     1433.53    160.74 o 
 -15   6   6    11137.26    10845.46    266.81 o 
 -14   6   6      131.56      -39.34    119.69 o 
 -13   6   6    12678.34    12832.62    270.50 o 
 -12   6   6     3659.09     3990.16    194.39 o 
 -11   6   6     5961.86     5873.62    184.88 o 
 -10   6   6     1677.91     2202.94    156.61 o 
  -9   6   6    35398.12    34325.65    436.99 o 
  -8   6   6     2092.67     2430.09    114.46 o 
  -7   6   6    10271.41     9608.40    162.49 o 
  -6   6   6     2740.33     2995.60    115.88 o 
  -5   6   6    46110.48    45994.68    456.41 o 
  -4   6   6     2242.12     2517.16     94.56 o 
  -3   6   6    31050.82    29672.18    315.89 o 
  -2   6   6     1865.60     2091.82     96.89 o 
  -1   6   6    46989.62    45844.45    493.83 o 
   0   6   6     4222.83     4657.61    153.15 o 
   1   6   6    23398.61    23149.63    289.85 o 
   2   6   6      311.69      362.12     75.71 o 
   3   6   6    22373.16    22045.01    286.79 o 
   4   6   6       93.51      136.57     58.91 o 
   5   6   6     8632.94     8469.79    153.22 o 
   6   6   6     1971.87     1965.61    108.86 o 
   7   6   6    19021.84    19252.62    285.35 o 
   8   6   6     1185.28     1016.67    122.30 o 
   9   6   6     4655.94     5729.51    194.04 o 
  10   6   6     1504.49     1337.05    141.27 o 
  11   6   6     7886.78     8200.66    313.20 o 
  12   6   6      277.57      -53.18    143.61 o 
  13   6   6     7616.95     8854.31    284.36 o 
  14   6   6      415.33      308.32    151.40 o 
  15   6   6     5990.19     7137.83    422.78 o 
  16   6   6      808.39      513.35    174.60 o 
  17   6   6     6048.20     6728.13    318.59 o 
  18   6   6      201.34     -195.23    195.23 o 
 -21   7   6     6554.91     7564.67    308.13 o 
 -20   7   6     1391.28     1502.52    198.77 o 
 -19   7   6     2417.58     1877.49    201.73 o 
 -18   7   6       67.23     -148.23    149.58 o 
 -17   7   6     7791.17     7757.24    287.99 o 
 -16   7   6     3951.43     4557.17    209.68 o 
 -15   7   6     4420.86     4069.96    192.80 o 
 -14   7   6     2192.93     2379.15    163.66 o 
 -13   7   6     7737.08     7765.36    220.27 o 
 -12   7   6      935.08      996.48    126.65 o 
 -11   7   6     7837.67     8081.96    207.52 o 
 -10   7   6     2581.82     3179.83    144.64 o 
  -9   7   6     4142.88     4356.06    149.20 o 
  -8   7   6      817.70      732.85     88.79 o 
  -7   7   6     8116.62     8131.26    193.97 o 
  -6   7   6     6732.41     6863.08    173.89 o 
  -5   7   6    19552.56    19559.39    302.06 o 
  -4   7   6     1560.44     1365.95     74.74 o 
  -3   7   6    31560.55    32429.27    382.44 o 
  -2   7   6     1953.33     1927.65     91.10 o 
  -1   7   6    38318.13    38655.84    416.97 o 
   0   7   6       79.16      131.32     75.25 o 
   1   7   6    14163.28    14598.53    230.01 o 
   2   7   6     2264.88     2238.59    106.04 o 
   3   7   6    16483.32    16780.71    246.90 o 
   4   7   6      806.19     1037.85     99.27 o 
   5   7   6    20998.83    20887.61    288.60 o 
   6   7   6     5910.08     6295.59    174.44 o 
   7   7   6     9734.68     9962.58    219.27 o 
   8   7   6      113.82      -78.38    104.82 o 
   9   7   6    12129.95    11835.69    257.96 o 
  10   7   6      395.74      347.48    123.35 o 
  11   7   6     3095.02     3000.47    172.16 o 
  12   7   6     1972.00     2492.02    181.44 o 
  13   7   6     3853.53     3321.77    201.25 o 
  14   7   6      337.70      219.54    159.18 o 
  15   7   6     4620.67     4064.71    230.61 o 
  16   7   6     2170.51     2697.86    226.32 o 
  17   7   6     1985.49     1329.28    210.05 o 
  18   7   6      328.55      457.55    196.64 o 
 -20   8   6     3008.38     3375.93    223.95 o 
 -19   8   6      289.93      -69.95    158.34 o 
 -18   8   6     3899.68     3588.60    202.32 o 
 -17   8   6      925.07      803.04    151.53 o 
 -16   8   6     5673.38     5163.61    211.54 o 
 -15   8   6      438.24      212.91    127.01 o 
 -14   8   6     5821.61     5863.65    283.42 o 
 -13   8   6       56.49      -61.86    110.89 o 
 -12   8   6     5442.79     5350.10    183.61 o 
 -11   8   6      751.55      729.54    141.02 o 
 -10   8   6     4518.31     4393.35    154.82 o 
  -9   8   6     1841.54     1910.85    115.81 o 
  -8   8   6     6790.79     6757.75    195.19 o 
  -7   8   6     6202.55     6692.49    186.01 o 
  -6   8   6     6559.34     6296.01    233.92 o 
  -5   8   6     8872.17     9130.13    179.07 o 
  -4   8   6    16904.28    16637.36    325.90 o 
  -3   8   6     5527.56     5641.68    134.84 o 
  -2   8   6     9602.66     9101.03    198.28 o 
  -1   8   6     7390.56     6906.18    154.24 o 
   0   8   6    14059.86    13912.38    230.41 o 
   1   8   6     5467.39     5296.49    156.20 o 
   2   8   6     3813.33     3952.81    142.77 o 
   3   8   6      741.33      618.40    104.51 o 
   4   8   6    12399.69    13095.23    234.36 o 
   5   8   6     1331.05     1189.42    112.63 o 
   6   8   6    20514.74    21031.37    328.85 o 
   7   8   6       40.02      -74.98    107.20 o 
   8   8   6     3625.71     4540.30    179.71 o 
   9   8   6      113.94      -55.26    112.92 o 
  10   8   6     9048.37    10667.26    248.47 o 
  11   8   6      888.68      839.02    140.52 o 
  12   8   6     7122.32     8551.03    264.63 o 
  13   8   6      866.91      669.69    163.38 o 
  14   8   6     5114.63     6367.98    264.70 o 
  15   8   6      890.06      683.28    193.11 o 
  16   8   6     5826.79     6618.34    303.47 o 
  17   8   6      923.12     1128.21    217.73 o 
 -19   9   6      963.99      884.95    225.76 o 
 -18   9   6     6002.57     6627.43    301.57 o 
 -17   9   6      848.24      744.21    186.93 o 
 -16   9   6     8012.92     8145.00    296.76 o 
 -15   9   6     2885.51     3156.73    214.13 o 
 -14   9   6     5976.25     6840.46    260.11 o 
 -13   9   6     1238.32     1321.38    168.85 o 
 -12   9   6    19173.46    19387.86    370.03 o 
 -11   9   6     4065.20     4606.50    195.81 o 
 -10   9   6     5844.62     6349.83    260.92 o 
  -9   9   6      425.98      408.85    150.14 o 
  -8   9   6    19329.70    19008.76    382.52 o 
  -7   9   6     1242.39     1317.86    202.79 o 
  -6   9   6    12795.17    12423.87    289.91 o 
  -5   9   6     3164.81     3360.56    176.78 o 
  -4   9   6    21415.42    21284.18    327.34 o 
  -3   9   6     1383.45     1236.78    105.13 o 
  -2   9   6     4698.59     5172.47    174.89 o 
  -1   9   6      312.97      342.62     93.06 o 
   0   9   6    17180.34    16770.45    254.31 o 
   1   9   6      820.73      915.05    107.89 o 
   2   9   6     1128.31     1018.03    114.57 o 
   3   9   6      192.73      157.66    105.40 o 
   4   9   6    13454.02    13021.83    267.41 o 
   5   9   6       28.33      -93.56     93.56 o 
   6   9   6    10397.33    10127.10    226.32 o 
   7   9   6     1147.08     1214.90    139.88 o 
   8   9   6    13762.61    12479.02    285.42 o 
   9   9   6       65.70      -98.22    131.53 o 
  10   9   6     8374.94     7903.90    263.91 o 
  11   9   6     1101.06     1271.09    168.22 o 
  12   9   6     5777.95     5521.73    336.08 o 
  13   9   6     1809.84     2093.66    219.94 o 
  14   9   6     6001.79     5944.87    420.57 o 
  15   9   6        8.96     -186.77    186.77 o 
  16   9   6     2261.13     1499.85    242.76 o 
 -18  10   6     1784.40     1283.03    206.22 o 
 -17  10   6     3775.12     3813.33    314.47 o 
 -16  10   6     3085.88     2526.32    210.22 o 
 -15  10   6     3431.38     3372.77    221.90 o 
 -14  10   6     3162.78     2476.00    192.26 o 
 -13  10   6     6264.10     7096.04    340.02 o 
 -12  10   6     1626.76     1613.23    157.05 o 
 -11  10   6     8905.99     8700.95    301.84 o 
 -10  10   6     3248.02     3144.87    215.82 o 
  -9  10   6     2834.36     2470.28    197.98 o 
  -8  10   6     2676.35     3116.59    234.09 o 
  -7  10   6     5235.29     5606.65    259.73 o 
  -6  10   6     8697.78     9132.19    261.35 o 
  -5  10   6     4326.71     4301.98    217.70 o 
  -4  10   6     6476.67     6752.19    226.08 o 
  -3  10   6     2888.19     3123.00    164.30 o 
  -2  10   6     3042.30     3392.94    154.86 o 
  -1  10   6    11964.43    11691.21    209.20 o 
   0  10   6      743.22      809.83    111.34 o 
   1  10   6     6797.38     7239.41    191.88 o 
   2  10   6     1421.12     1497.90    145.79 o 
   3  10   6     1530.80     1750.04    177.19 o 
   4  10   6     4619.83     4915.39    225.25 o 
   5  10   6    20285.33    20672.97    383.83 o 
   6  10   6     2848.41     2738.40    164.38 o 
   7  10   6     6288.45     6714.00    277.73 o 
   8  10   6      700.50      902.24    147.54 o 
   9  10   6     9215.13     9979.38    354.27 o 
  10  10   6     1365.06     1011.45    166.23 o 
  11  10   6    11438.25    12506.58    324.60 o 
  12  10   6     1505.90     1419.12    226.39 o 
  13  10   6     4782.79     5691.86    380.59 o 
  14  10   6     2205.53     2485.24    302.74 o 
  15  10   6     5181.65     6372.26    669.34 o 
 -17  11   6     5943.59     6868.93    296.69 o 
 -16  11   6       47.82      -40.89    172.67 o 
 -15  11   6     3901.84     4324.11    350.78 o 
 -14  11   6      187.73      208.12    192.50 o 
 -13  11   6     9877.80    10260.13    350.90 o 
 -12  11   6      497.59      475.62    188.02 o 
 -11  11   6     6829.50     7567.87    304.55 o 
 -10  11   6     2781.11     2948.63    217.71 o 
  -9  11   6     7440.49     7292.30    309.34 o 
  -8  11   6      715.78      483.02    185.94 o 
  -7  11   6     8099.32     9019.12    354.80 o 
  -6  11   6      764.87      707.26    174.23 o 
  -5  11   6     5697.22     5360.88    252.09 o 
  -4  11   6     1981.81     2170.84    181.62 o 
  -3  11   6     8495.37     8796.93    308.35 o 
  -2  11   6       31.50     -119.97    119.97 o 
  -1  11   6     7618.26     7622.28    304.51 o 
   0  11   6        6.83     -114.48    114.48 o 
   1  11   6     7650.71     6723.75    311.61 o 
   2  11   6      838.09      760.26    144.83 o 
   3  11   6     6689.70     6454.95    244.69 o 
   4  11   6      886.73      901.48    159.83 o 
   5  11   6     5140.64     4324.83    185.05 o 
   6  11   6       34.83        1.74    121.87 o 
   7  11   6     4246.93     3691.26    193.78 o 
   8  11   6      596.27      206.01    139.70 o 
   9  11   6     6453.54     6218.10    272.23 o 
  10  11   6        7.68      -95.55    145.91 o 
  11  11   6     4069.54     3659.56    229.47 o 
  12  11   6      948.47     1279.55    287.75 o 
  13  11   6     4568.59     3851.84    270.85 o 
 -15  12   6     1645.48     1439.61    270.50 o 
 -14  12   6      853.82      802.87    245.84 o 
 -13  12   6     3269.39     2930.73    281.88 o 
 -12  12   6     4456.21     4229.49    297.03 o 
 -11  12   6      473.25      144.95    203.13 o 
 -10  12   6     3133.92     3003.81    258.21 o 
  -9  12   6      566.85      109.72    191.03 o 
  -8  12   6     3355.44     2937.85    303.59 o 
  -7  12   6      348.73      -24.01    173.25 o 
  -6  12   6     7034.65     7068.66    290.45 o 
  -5  12   6     2570.38     2616.63    205.81 o 
  -4  12   6     1452.92     1372.48    177.63 o 
  -3  12   6      121.53      -33.15    143.26 o 
  -2  12   6     2441.65     2256.84    184.55 o 
  -1  12   6     4260.67     4544.75    227.02 o 
   0  12   6     7690.18     8064.67    272.45 o 
   1  12   6      506.00      299.09    144.00 o 
   2  12   6     4280.54     4343.89    280.83 o 
   3  12   6     3668.15     3423.44    164.58 o 
   4  12   6     5887.58     6446.68    305.55 o 
   5  12   6     3918.75     4080.99    199.71 o 
   6  12   6     9069.54     9978.20    396.84 o 
   7  12   6     2379.67     2502.81    216.48 o 
   8  12   6     3441.03     4131.68    244.65 o 
   9  12   6     2369.44     2419.79    197.68 o 
  10  12   6     5610.98     5824.31    254.67 o 
  11  12   6     1643.23     1737.06    269.70 o 
 -13  13   6       20.01     -163.12    263.07 o 
 -12  13   6     5684.35     6212.14    412.68 o 
 -11  13   6        3.66      -76.52    206.41 o 
 -10  13   6     3304.22     3196.59    278.10 o 
  -9  13   6        3.36     -201.20    202.13 o 
  -8  13   6     4596.33     5344.34    442.39 o 
  -7  13   6      139.51      -82.60    182.83 o 
  -6  13   6     6136.56     6637.83    289.48 o 
  -5  13   6       33.61     -159.62    159.62 o 
  -4  13   6     5805.16     6077.41    265.54 o 
  -3  13   6      169.53      -27.10    161.49 o 
  -2  13   6     4326.26     4292.18    326.81 o 
  -1  13   6       57.06       -3.99    146.24 o 
   0  13   6     4042.85     3738.25    246.51 o 
   1  13   6       10.91     -144.64    144.64 o 
   2  13   6     4815.39     4334.95    318.49 o 
   3  13   6      970.43     1045.42    243.73 o 
   4  13   6     1649.07     1415.99    186.93 o 
   5  13   6       38.13     -118.44    155.38 o 
   6  13   6     2642.97     2036.94    250.34 o 
   7  13   6      164.66      -91.32    144.55 o 
   8  13   6     2293.16     1732.80    193.64 o 
   9  13   6      112.67      -99.94    216.11 o 
 -10  14   6     2016.26     1240.70    253.63 o 
  -9  14   6      893.95      546.16    226.16 o 
  -8  14   6     1601.80     1491.37    225.79 o 
  -7  14   6     2331.52     2787.64    370.59 o 
  -6  14   6     3031.87     2713.60    241.28 o 
  -5  14   6     1091.81      931.13    208.88 o 
  -4  14   6      881.75      707.48    234.31 o 
  -3  14   6      998.21      698.42    196.01 o 
  -2  14   6      394.48      114.89    207.55 o 
  -1  14   6     4965.93     5394.83    276.45 o 
   0  14   6     2965.28     3404.53    238.35 o 
   1  14   6     3565.85     3797.97    414.54 o 
   2  14   6     1691.04     1573.43    214.59 o 
   3  14   6     3550.30     4198.95    283.74 o 
   4  14   6     1866.78     2041.29    214.82 o 
   5  14   6     2763.56     3190.85    239.06 o 
   6  14   6      610.23      715.97    287.59 o 
  -4  15   6      652.65      557.29    540.35 o 
  -3  15   6     3478.63     3751.20    276.65 o 
  -2  15   6      572.46      107.26    200.38 o 
  -1  15   6     3487.60     3911.16    444.90 o 
   0  15   6       26.64       -4.38    203.47 o 
 -23   0   7     5542.17     5579.13    470.39 o 
 -21   0   7    12342.99    12587.55    564.03 o 
 -19   0   7    25444.45    25580.75    747.74 o 
 -17   0   7     4581.58     4599.30    430.34 o 
 -15   0   7    13574.48    12193.80    302.56 o 
 -13   0   7    39436.57    36966.68    515.54 o 
 -11   0   7    29691.96    27694.24    401.50 o 
  -9   0   7    40422.51    38593.32    554.82 o 
  -7   0   7    44210.52    43456.01    580.67 o 
  -5   0   7    46760.96    46695.52    597.54 o 
  -3   0   7    58477.09    58063.54    742.00 o 
  -1   0   7    23240.33    20721.40    341.88 o 
   1   0   7     2411.16     2487.33    222.02 o 
   3   0   7     8071.18     7735.60    191.12 o 
   5   0   7    19420.73    22568.04    350.07 o 
   7   0   7    24797.68    24595.49    388.66 o 
   9   0   7    29720.46    29239.85    513.13 o 
  11   0   7    29440.13    29548.54    544.51 o 
  13   0   7    13301.72    12885.35    360.34 o 
  15   0   7    11478.08    11268.80    366.42 o 
  17   0   7     9167.66     8829.24    496.71 o 
  19   0   7     4765.86     4229.31    418.82 o 
 -24   1   7      200.23     -175.42    336.41 o 
 -23   1   7     2282.46     1684.44    277.88 o 
 -22   1   7     4273.75     5030.18    333.62 o 
 -21   1   7     6408.02     6866.01    328.60 o 
 -20   1   7     1319.08     1463.00    222.49 o 
 -19   1   7     4168.97     4453.70    269.16 o 
 -18   1   7     6039.61     6628.86    272.29 o 
 -17   1   7     6489.25     7080.69    279.80 o 
 -16   1   7     3370.13     3810.90    181.35 o 
 -15   1   7     4290.66     4942.83    201.41 o 
 -14   1   7     2434.96     2633.90    119.02 o 
 -13   1   7     6544.82     6972.93    154.05 o 
 -12   1   7    11112.81    11086.28    182.83 o 
 -11   1   7     4504.93     5261.46    122.98 o 
 -10   1   7     5923.15     6406.46    136.50 o 
  -9   1   7     7597.91     8875.26    143.04 o 
  -8   1   7    12665.38    12871.96    182.35 o 
  -7   1   7      890.77     1269.98     73.91 o 
  -6   1   7     7426.00     7452.76    110.91 o 
  -5   1   7      294.82      213.25     42.64 o 
  -4   1   7    17017.85    16496.15    170.75 o 
  -3   1   7    25757.12    26765.68    243.58 o 
  -2   1   7    11306.31    11307.11    156.57 o 
  -1   1   7    79956.51    82701.73    664.79 o 
   0   1   7    23333.01    22591.71    221.23 o 
   1   1   7    12914.29    12589.56    134.89 o 
   2   1   7     1857.83     1650.38     71.93 o 
   3   1   7    12245.32    10935.87    145.98 o 
   4   1   7    44749.66    44468.98    405.49 o 
   5   1   7     3619.10     3120.19    101.68 o 
   6   1   7     2489.81     2096.54     93.18 o 
   7   1   7    11516.02    10269.03    163.23 o 
   8   1   7    13105.11    12628.76    198.05 o 
   9   1   7    24304.56    23275.57    312.65 o 
  10   1   7    14566.55    14173.95    242.25 o 
  11   1   7     6953.27     7413.57    194.48 o 
  12   1   7     1631.36     1621.16    135.77 o 
  13   1   7     3987.17     4261.38    192.28 o 
  14   1   7      587.58      536.46    127.65 o 
  15   1   7     5046.10     5513.30    204.71 o 
  16   1   7     1467.15     1766.86    204.38 o 
  17   1   7     3621.42     3495.52    246.90 o 
  18   1   7      685.31      635.34    196.36 o 
  19   1   7     2143.29     2628.75    258.37 o 
  20   1   7     3027.60     3801.46    294.03 o 
 -24   2   7     8520.41     9381.54    489.31 o 
 -23   2   7      357.23      335.86    247.15 o 
 -22   2   7     5951.13     6659.61    362.52 o 
 -21   2   7      724.80      471.32    225.15 o 
 -20   2   7     9668.02    10015.04    402.35 o 
 -19   2   7      357.14      288.80    162.94 o 
 -18   2   7    19648.28    19615.98    374.81 o 
 -17   2   7       41.12     -132.17    132.17 o 
 -16   2   7     8586.33     8493.65    246.70 o 
 -15   2   7     3555.86     3559.06    163.68 o 
 -14   2   7    29609.16    28473.62    376.87 o 
 -13   2   7      823.99      735.73     95.30 o 
 -12   2   7    32009.10    29675.81    316.00 o 
 -11   2   7     4734.52     5093.82    119.59 o 
 -10   2   7    33742.51    32555.86    311.59 o 
  -9   2   7      785.48     1116.21     75.63 o 
  -8   2   7    48669.64    46264.07    410.55 o 
  -7   2   7      740.14      898.96     69.81 o 
  -6   2   7    27728.45    27929.99    271.41 o 
  -5   2   7     2292.11     2716.19     73.02 o 
  -4   2   7     6854.11     6968.63     99.25 o 
  -3   2   7     8327.35     9561.35    108.60 o 
  -2   2   7    35109.36    34950.96    289.75 o 
  -1   2   7     9176.34     8115.77    100.37 o 
   0   2   7   115803.91   120234.05    955.33 o 
   1   2   7     2857.22     3518.33     68.90 o 
   2   2   7    28791.90    30280.23    250.56 o 
   3   2   7    13155.83    13262.29    168.39 o 
   4   2   7    25897.10    26423.12    283.53 o 
   5   2   7     4209.80     4919.37    106.80 o 
   6   2   7    11048.23    12153.97    163.59 o 
   7   2   7      363.25      401.54     66.26 o 
   8   2   7    29772.73    29746.06    324.29 o 
   9   2   7     1481.12     1382.76    112.41 o 
  10   2   7    28775.40    28184.75    364.48 o 
  11   2   7     7943.10     7805.99    200.69 o 
  12   2   7    20169.19    20156.21    315.27 o 
  13   2   7     3785.10     3449.51    186.55 o 
  14   2   7     5027.62     4901.13    219.36 o 
  15   2   7     2997.21     2626.72    191.77 o 
  16   2   7     4006.75     3813.64    213.85 o 
  17   2   7        5.10        6.51    172.12 o 
  18   2   7     6452.47     6215.79    299.54 o 
  19   2   7       13.11      -48.51    173.88 o 
  20   2   7     4140.64     3879.04    473.05 o 
 -23   3   7      124.00      -16.94    232.73 o 
 -22   3   7     2981.10     3066.14    291.53 o 
 -21   3   7      880.19      941.54    206.88 o 
 -20   3   7     4043.77     3764.50    237.59 o 
 -19   3   7      866.35      815.94    160.63 o 
 -18   3   7      375.12      226.56    148.80 o 
 -17   3   7     3021.00     3333.06    194.54 o 
 -16   3   7     7436.58     7849.50    236.22 o 
 -15   3   7     1616.80     1664.34    147.49 o 
 -14   3   7     7976.94     8538.89    220.35 o 
 -13   3   7     6040.03     6234.95    188.37 o 
 -12   3   7     8807.57     9175.87    203.19 o 
 -11   3   7    14062.03    13654.95    242.87 o 
 -10   3   7      771.55      692.10     81.14 o 
  -9   3   7     5639.51     5770.25    120.19 o 
  -8   3   7     2847.51     3320.16    120.44 o 
  -7   3   7    28486.75    28393.94    296.34 o 
  -6   3   7    11406.15    11375.21    148.35 o 
  -5   3   7    16797.05    15876.77    174.60 o 
  -4   3   7    15013.81    15306.64    196.33 o 
  -3   3   7     6753.20     6291.13     94.53 o 
  -2   3   7    12785.54    12017.87    130.91 o 
  -1   3   7    12994.47    12410.56    129.17 o 
   0   3   7     3997.20     4317.26     79.37 o 
   1   3   7      113.66      105.00     59.41 o 
   2   3   7    23648.04    23124.62    235.60 o 
   3   3   7     2458.48     2533.44     84.29 o 
   4   3   7    18277.71    17684.37    206.46 o 
   5   3   7     8528.72     8615.14    129.43 o 
   6   3   7    20020.67    19370.25    213.49 o 
   7   3   7      413.79      431.19     64.17 o 
   8   3   7     4843.44     4710.27    118.12 o 
   9   3   7     4935.15     5099.72    147.80 o 
  10   3   7    15364.64    14626.86    234.92 o 
  11   3   7    16634.38    16284.15    257.14 o 
  12   3   7     4278.05     4419.49    235.71 o 
  13   3   7     3732.09     4090.70    202.25 o 
  14   3   7     3870.60     3874.25    203.63 o 
  15   3   7     3244.33     3686.28    209.52 o 
  16   3   7     3217.11     3615.08    214.13 o 
  17   3   7     2551.33     3138.38    216.76 o 
  18   3   7     2422.97     2762.21    216.99 o 
  19   3   7      566.61      564.74    174.55 o 
 -23   4   7     4783.14     4504.75    325.34 o 
 -22   4   7       23.41       32.18    196.06 o 
 -21   4   7     6004.63     5972.14    286.39 o 
 -20   4   7      794.31      392.56    226.07 o 
 -19   4   7    11379.88    12094.77    312.88 o 
 -18   4   7      229.35        2.54    141.56 o 
 -17   4   7    14956.85    15575.23    331.75 o 
 -16   4   7     7715.57     8070.81    241.30 o 
 -15   4   7    11828.38    11056.69    251.41 o 
 -14   4   7      216.95      163.44    113.80 o 
 -13   4   7     8933.01     8617.84    208.32 o 
 -12   4   7       27.62      -31.28     93.25 o 
 -11   4   7    10900.03    10365.80    205.40 o 
 -10   4   7      387.04      401.85     87.83 o 
  -9   4   7    43862.20    41541.73    441.65 o 
  -8   4   7     3109.10     3807.42    109.58 o 
  -7   4   7    60431.70    58267.47    688.21 o 
  -6   4   7       61.39       75.00     53.36 o 
  -5   4   7    18160.17    17296.71    182.87 o 
  -4   4   7      647.50     1204.58     76.15 o 
  -3   4   7    22123.44    20934.28    236.24 o 
  -2   4   7     2520.65     2055.11     71.04 o 
  -1   4   7    35096.84    35308.55    342.02 o 
   0   4   7    22066.61    24900.13    264.66 o 
   1   4   7    45205.64    46536.30    459.05 o 
   2   4   7     2031.09     2797.29     96.39 o 
   3   4   7    36473.46    36075.55    327.82 o 
   4   4   7       43.00       30.30     56.68 o 
   5   4   7    25923.55    25305.53    316.32 o 
   6   4   7     2940.75     3270.02    147.06 o 
   7   4   7    19840.81    19765.54    256.83 o 
   8   4   7     1059.99     1440.05    103.54 o 
   9   4   7    24454.85    24450.77    280.53 o 
  10   4   7     7635.34     7433.88    180.86 o 
  11   4   7    15062.27    14933.68    269.80 o 
  12   4   7     2230.53     2118.81    173.99 o 
  13   4   7     7948.09     8040.89    242.32 o 
  14   4   7       20.93       23.53    145.53 o 
  15   4   7     3352.39     2903.79    195.67 o 
  16   4   7     1141.90      559.01    160.02 o 
  17   4   7     3276.37     2953.89    208.05 o 
  18   4   7      180.68     -135.92    169.36 o 
  19   4   7     7439.07     6735.77    325.05 o 
 -23   5   7      891.79      239.06    218.52 o 
 -22   5   7      437.39      369.59    210.12 o 
 -21   5   7      756.71      559.89    191.50 o 
 -20   5   7      611.65      427.09    181.54 o 
 -19   5   7     2849.49     2625.64    215.09 o 
 -18   5   7     1123.01      968.86    175.25 o 
 -17   5   7     2128.49     1878.57    176.94 o 
 -16   5   7     4893.49     5067.58    219.79 o 
 -15   5   7    16509.07    16360.73    303.17 o 
 -14   5   7      448.37      510.85    124.77 o 
 -13   5   7    15527.77    14969.56    270.25 o 
 -12   5   7     1560.93     1375.47    122.63 o 
 -11   5   7    20376.80    20548.61    301.57 o 
 -10   5   7     2983.94     2654.92    123.93 o 
  -9   5   7    13794.17    13662.44    218.52 o 
  -8   5   7     3367.55     3721.29    122.39 o 
  -7   5   7     9704.56     9662.08    155.54 o 
  -6   5   7    10580.82     9483.93    128.23 o 
  -5   5   7     7149.33     7050.85    249.83 o 
  -4   5   7     6885.72     6845.33    133.63 o 
  -3   5   7    10399.85     9433.99    145.19 o 
  -2   5   7    13154.57    11747.90    185.38 o 
  -1   5   7      839.04      799.57     88.12 o 
   0   5   7     1488.59     1416.55     84.25 o 
   1   5   7     5042.90     5084.51    130.29 o 
   2   5   7     5237.75     5426.42    141.67 o 
   3   5   7     5908.14     5254.69    163.09 o 
   4   5   7      822.93     1047.90     76.96 o 
   5   5   7    10232.93     9706.90    153.11 o 
   6   5   7     6203.51     6519.31    151.31 o 
   7   5   7    15120.17    14436.85    228.21 o 
   8   5   7       70.46      170.20     93.91 o 
   9   5   7     4340.53     4926.70    164.63 o 
  10   5   7     1545.53     2074.00    213.09 o 
  11   5   7    10244.63    10098.97    274.02 o 
  12   5   7     1830.77     2095.51    186.79 o 
  13   5   7      831.58      898.32    166.06 o 
  14   5   7     2971.18     3812.00    254.45 o 
  15   5   7     3551.52     4028.40    268.61 o 
  16   5   7     3039.51     3748.07    288.70 o 
  17   5   7     3438.35     3957.57    315.78 o 
  18   5   7     1416.37     1373.66    230.61 o 
 -22   6   7     3464.78     3629.80    262.87 o 
 -21   6   7      178.38      125.62    200.17 o 
 -20   6   7     9366.21     9640.94    324.53 o 
 -19   6   7      541.45       85.84    159.06 o 
 -18   6   7     4396.60     3835.90    229.55 o 
 -17   6   7     1960.78     1490.80    169.60 o 
 -16   6   7     5076.25     5699.34    277.91 o 
 -15   6   7     1957.56     1669.44    168.11 o 
 -14   6   7     5328.09     6033.93    215.57 o 
 -13   6   7     1182.52     1022.38    135.36 o 
 -12   6   7     6407.87     6862.20    208.13 o 
 -11   6   7     4177.61     4443.12    167.70 o 
 -10   6   7    14366.84    14423.05    255.51 o 
  -9   6   7     1749.87     2083.11    119.48 o 
  -8   6   7    29210.78    28152.02    340.87 o 
  -7   6   7      651.44      485.59     75.49 o 
  -6   6   7    21842.64    20806.77    285.11 o 
  -5   6   7     4284.29     4482.99    117.19 o 
  -4   6   7    33119.97    33221.26    370.96 o 
  -3   6   7      148.03       11.99     58.14 o 
  -2   6   7    23271.96    21618.29    296.25 o 
  -1   6   7    12066.43    12849.61    239.53 o 
   0   6   7    31153.59    29823.16    378.26 o 
   1   6   7     8210.67     8729.54    217.09 o 
   2   6   7    29969.58    30266.02    358.78 o 
   3   6   7      831.88      841.97     88.56 o 
   4   6   7    26541.14    26730.87    339.86 o 
   5   6   7     8296.46     8422.63    224.31 o 
   6   6   7    23406.85    23811.75    321.07 o 
   7   6   7     2694.26     2987.79    136.20 o 
   8   6   7     7751.40     8124.88    212.75 o 
   9   6   7      190.38      157.11    118.41 o 
  10   6   7     4340.38     4956.45    215.52 o 
  11   6   7     3374.29     2948.93    191.20 o 
  12   6   7     5679.52     6180.08    252.20 o 
  13   6   7      454.81       58.67    151.71 o 
  14   6   7     9050.69     8955.55    300.53 o 
  15   6   7      264.14     -197.27    197.27 o 
  16   6   7     2470.10     2325.78    231.78 o 
  17   6   7     1305.65      618.71    201.80 o 
  18   6   7     5013.59     4558.24    291.30 o 
 -21   7   7      574.77      426.57    190.74 o 
 -20   7   7     3200.39     2775.33    290.10 o 
 -19   7   7      214.48     -153.19    153.19 o 
 -18   7   7     3498.45     3354.05    203.20 o 
 -17   7   7      967.06      819.05    184.51 o 
 -16   7   7      728.47      370.95    143.67 o 
 -15   7   7     4120.87     4254.66    198.18 o 
 -14   7   7     7319.66     7013.66    289.72 o 
 -13   7   7       25.51      133.30    117.41 o 
 -12   7   7     1808.60     1742.47    141.53 o 
 -11   7   7      255.49      162.38    104.16 o 
 -10   7   7    18742.41    18795.13    301.50 o 
  -9   7   7     2216.55     2518.47    133.24 o 
  -8   7   7    21886.90    22018.67    310.76 o 
  -7   7   7     5250.69     4989.18    167.81 o 
  -6   7   7     9048.42     9310.36    205.01 o 
  -5   7   7     2184.52     2177.37    108.66 o 
  -4   7   7    17959.86    17195.29    222.21 o 
  -3   7   7     7113.35     6916.76    126.54 o 
  -2   7   7    26930.75    26402.56    315.60 o 
  -1   7   7     1228.09     1101.48     97.37 o 
   0   7   7    11189.85    11488.32    202.30 o 
   1   7   7     2410.91     2488.00    124.76 o 
   2   7   7     7515.02     7493.87    178.50 o 
   3   7   7     4081.34     4552.80    146.41 o 
   4   7   7     1656.19     1953.34    120.51 o 
   5   7   7     2486.61     2820.18    123.78 o 
   6   7   7    10391.20     9945.08    212.03 o 
   7   7   7     2715.26     3344.87    157.92 o 
   8   7   7    14416.97    14462.37    278.39 o 
   9   7   7       49.10       79.18    115.45 o 
  10   7   7     2856.03     3191.31    181.27 o 
  11   7   7     3823.51     4639.89    231.26 o 
  12   7   7     6406.14     7205.07    248.86 o 
  13   7   7     1868.77     2056.31    186.23 o 
  14   7   7     1742.12     1710.59    211.10 o 
  15   7   7     1109.32     1366.39    293.94 o 
  16   7   7     6625.29     7533.60    298.62 o 
  17   7   7      865.32      948.37    207.69 o 
 -20   8   7      785.71      671.05    179.01 o 
 -19   8   7     7163.29     7776.62    302.66 o 
 -18   8   7       53.16     -143.85    143.85 o 
 -17   8   7     5867.06     6177.56    232.10 o 
 -16   8   7      178.18     -120.44    138.91 o 
 -15   8   7    11225.86    11418.79    271.75 o 
 -14   8   7     2457.95     2204.62    159.47 o 
 -13   8   7     8836.90     8933.51    232.15 o 
 -12   8   7     1443.58     1149.87    127.58 o 
 -11   8   7    12890.76    12621.42    249.86 o 
 -10   8   7    12959.70    12590.61    244.50 o 
  -9   8   7    22357.13    22358.95    368.57 o 
  -8   8   7      232.83      149.57    110.18 o 
  -7   8   7    20462.67    20364.83    332.40 o 
  -6   8   7     4709.63     5469.58    198.65 o 
  -5   8   7    18731.51    18458.56    301.36 o 
  -4   8   7     7109.03     7346.41    203.65 o 
  -3   8   7     4116.64     4268.03    124.59 o 
  -2   8   7     8327.59     8400.73    171.39 o 
  -1   8   7    12371.48    12033.10    209.67 o 
   0   8   7     7367.49     7441.57    166.34 o 
   1   8   7    10467.31    10004.67    221.19 o 
   2   8   7     6101.80     6031.56    187.05 o 
   3   8   7     6251.20     6552.48    177.64 o 
   4   8   7     1729.09     1898.70    127.06 o 
   5   8   7    12570.65    12454.31    251.03 o 
   6   8   7     8527.42     8357.21    222.62 o 
   7   8   7    10652.28    10672.87    238.94 o 
   8   8   7     1172.29     1108.20    134.76 o 
   9   8   7    11980.05    11585.79    308.83 o 
  10   8   7      620.35      395.38    138.35 o 
  11   8   7     7072.16     7234.99    309.14 o 
  12   8   7     2501.80     1876.81    173.15 o 
  13   8   7     6088.84     6642.59    287.51 o 
  14   8   7      100.93      111.58    157.30 o 
  15   8   7     3293.93     3792.75    249.64 o 
  16   8   7     1759.20      982.07    211.42 o 
 -19   9   7     3410.53     3574.47    329.55 o 
 -18   9   7      227.45      241.95    190.16 o 
 -17   9   7     2714.94     2398.37    218.14 o 
 -16   9   7      749.08      520.46    172.26 o 
 -15   9   7     4368.72     4009.23    224.97 o 
 -14   9   7      349.39       14.31    147.07 o 
 -13   9   7     8472.97     8158.18    213.10 o 
 -12   9   7      123.43      -13.06    151.73 o 
 -11   9   7     2112.42     1982.61    120.69 o 
 -10   9   7      398.76      289.55    113.97 o 
  -9   9   7    17536.01    17904.96    327.65 o 
  -8   9   7      165.44      -33.27    104.42 o 
  -7   9   7     8744.45     8905.47    214.40 o 
  -6   9   7     1083.83      743.92    113.25 o 
  -5   9   7     5412.07     5467.68    235.72 o 
  -4   9   7     2610.02     2559.47    136.32 o 
  -3   9   7    10581.43    10248.18    206.61 o 
  -2   9   7      346.20      156.10     81.69 o 
  -1   9   7     4011.70     4505.73    157.00 o 
   0   9   7      493.66      394.10    104.44 o 
   1   9   7    12395.09    13171.88    239.95 o 
   2   9   7     2101.93     2216.74    133.48 o 
   3   9   7     7138.65     7569.68    217.23 o 
   4   9   7     2173.07     2568.68    154.12 o 
   5   9   7     5031.33     5632.26    217.27 o 
   6   9   7      699.20     1122.11    125.54 o 
   7   9   7     3964.70     4004.03    174.69 o 
   8   9   7     1852.64     2454.78    163.32 o 
   9   9   7     6896.26     8038.53    284.02 o 
  10   9   7     2455.10     2768.48    201.76 o 
  11   9   7     2975.32     3597.21    254.43 o 
  12   9   7     3971.99     4683.35    297.42 o 
  13   9   7     8551.89     9465.72    331.92 o 
  14   9   7     1560.84     1548.69    257.76 o 
  15   9   7     1513.73     2030.19    257.51 o 
 -18  10   7     4659.66     5519.46    285.70 o 
 -17  10   7     1583.76     1332.97    200.50 o 
 -16  10   7     4928.31     5033.64    254.75 o 
 -15  10   7     1509.77     1307.28    184.75 o 
 -14  10   7     8391.63     9032.04    282.58 o 
 -13  10   7      812.91      656.90    159.94 o 
 -12  10   7     8096.04     8446.62    308.80 o 
 -11  10   7     2229.53     2157.85    206.99 o 
 -10  10   7    13336.15    13336.04    345.34 o 
  -9  10   7     3754.77     3774.90    220.04 o 
  -8  10   7     7386.21     7782.37    266.55 o 
  -7  10   7     3124.44     3068.05    196.77 o 
  -6  10   7    11450.43    11474.36    289.07 o 
  -5  10   7     5376.16     5726.96    266.55 o 
  -4  10   7     3112.30     3278.53    172.72 o 
  -3  10   7      246.83       99.05     93.95 o 
  -2  10   7    10646.38    10306.71    201.13 o 
  -1  10   7     3854.89     4140.06    165.42 o 
   0  10   7     5754.31     6028.92    178.84 o 
   1  10   7    10504.19    10385.54    224.04 o 
   2  10   7     3295.67     3166.99    164.44 o 
   3  10   7     1635.11     1515.28    155.71 o 
   4  10   7     6369.92     6619.93    245.90 o 
   5  10   7      836.18      659.50    158.39 o 
   6  10   7     9871.90     9766.79    248.72 o 
   7  10   7     3196.52     2963.25    199.96 o 
   8  10   7     5948.87     5816.74    223.92 o 
   9  10   7      955.55      559.55    150.58 o 
  10  10   7     6922.29     6828.84    253.54 o 
  11  10   7     3620.42     3207.17    289.55 o 
  12  10   7     4019.95     4434.08    347.80 o 
  13  10   7     1270.67      773.31    200.93 o 
  14  10   7     2564.08     3173.53    262.34 o 
 -17  11   7      389.48      383.23    195.22 o 
 -16  11   7     3884.09     3613.63    238.72 o 
 -15  11   7        7.37      123.19    201.02 o 
 -14  11   7     3858.15     3685.86    283.21 o 
 -13  11   7        4.64     -175.56    175.56 o 
 -12  11   7     1403.17     1008.28    201.32 o 
 -11  11   7      361.06      260.43    177.46 o 
 -10  11   7     2497.81     2596.93    220.38 o 
  -9  11   7     1132.96      734.33    180.29 o 
  -8  11   7     4507.46     4806.77    243.12 o 
  -7  11   7       35.41     -143.43    143.43 o 
  -6  11   7     1906.54     1788.14    196.01 o 
  -5  11   7      427.58      375.69    158.98 o 
  -4  11   7     5805.83     6003.69    236.95 o 
  -3  11   7     1344.14     1192.23    159.24 o 
  -2  11   7     5710.39     6017.29    253.05 o 
  -1  11   7     1269.47     1371.65    182.86 o 
   0  11   7     6779.69     7111.38    463.91 o 
   1  11   7     1496.33     1684.22    180.62 o 
   2  11   7     8604.85     9478.27    255.86 o 
   3  11   7       15.59     -137.00    137.00 o 
   4  11   7    10357.78    10733.70    304.75 o 
   5  11   7       46.69     -148.86    148.86 o 
   6  11   7     6235.93     6506.34    221.65 o 
   7  11   7      105.58      267.87    135.98 o 
   8  11   7     8448.84     9435.98    271.16 o 
   9  11   7     1001.08      865.56    166.83 o 
  10  11   7     3383.60     4017.89    227.82 o 
  11  11   7      316.02      220.59    174.64 o 
  12  11   7     4638.09     5637.58    286.18 o 
  13  11   7      264.49      -71.18    235.42 o 
 -15  12   7     3416.48     3864.89    328.22 o 
 -14  12   7     2757.82     2373.84    277.57 o 
 -13  12   7     4032.38     4074.17    301.52 o 
 -12  12   7     3987.95     3703.23    294.05 o 
 -11  12   7     3431.57     3479.45    277.10 o 
 -10  12   7     1494.46      991.55    214.19 o 
  -9  12   7     4048.16     4088.08    305.59 o 
  -8  12   7     2923.68     2665.02    280.07 o 
  -7  12   7     2868.08     2726.43    233.12 o 
  -6  12   7     1061.22      962.21    209.80 o 
  -5  12   7     4530.00     4432.82    241.10 o 
  -4  12   7     2269.43     1919.04    186.03 o 
  -3  12   7     7687.96     6919.18    255.03 o 
  -2  12   7     2204.82     1895.37    175.99 o 
  -1  12   7     5834.67     5505.11    302.36 o 
   0  12   7     3157.22     3314.01    191.70 o 
   1  12   7     1169.47     1113.81    228.39 o 
   2  12   7     5142.23     4744.31    306.85 o 
   3  12   7     2647.55     2339.58    205.27 o 
   4  12   7     3399.26     2992.40    236.02 o 
   5  12   7     4588.05     4800.83    251.75 o 
   6  12   7     2714.60     2461.59    179.03 o 
   7  12   7     4620.29     5002.07    270.44 o 
   8  12   7     1244.91      629.19    161.85 o 
   9  12   7     1784.47     2065.35    260.65 o 
  10  12   7     3580.03     3125.62    291.26 o 
  11  12   7     2748.79     2987.38    242.39 o 
 -13  13   7     1453.09     1362.04    267.98 o 
 -12  13   7       36.70     -221.03    221.03 o 
 -11  13   7     3094.87     3069.35    282.87 o 
 -10  13   7       23.82     -256.65    256.65 o 
  -9  13   7     4189.96     3920.98    281.65 o 
  -8  13   7      887.20      632.06    209.23 o 
  -7  13   7      691.33      415.01    184.06 o 
  -6  13   7      426.22      182.23    177.28 o 
  -5  13   7     3225.75     2975.30    226.39 o 
  -4  13   7      787.58      535.38    170.85 o 
  -3  13   7     5192.94     5243.82    261.01 o 
  -2  13   7       34.65      173.80    160.49 o 
  -1  13   7     2487.19     2927.82    202.83 o 
   0  13   7       43.84       -1.34    150.20 o 
   1  13   7     5874.75     6451.96    366.11 o 
   2  13   7      289.43      152.81    223.98 o 
   3  13   7     6888.40     8250.82    513.53 o 
   4  13   7       67.05     -295.33    295.33 o 
   5  13   7     2217.25     2592.06    291.23 o 
   6  13   7      100.97     -117.31    145.36 o 
   7  13   7     3864.89     4729.20    338.41 o 
   8  13   7       10.66     -141.55    158.07 o 
   9  13   7     3027.52     3200.64    559.17 o 
 -10  14   7     1730.07     1787.19    408.02 o 
  -9  14   7     2081.65     1782.06    252.37 o 
  -8  14   7     5034.44     5620.53    301.34 o 
  -7  14   7     4377.02     4211.66    271.31 o 
  -6  14   7     1282.15     1107.92    212.37 o 
  -5  14   7     2064.29     1785.20    233.72 o 
  -4  14   7     3768.84     3676.45    261.38 o 
  -3  14   7     4285.52     3834.84    261.68 o 
  -2  14   7     3525.12     3367.06    246.51 o 
  -1  14   7     1006.69      583.68    199.31 o 
   0  14   7     5381.93     5011.37    318.72 o 
   1  14   7     1746.60     1794.76    277.33 o 
   2  14   7     5067.58     5297.63    496.81 o 
   3  14   7     1999.72      958.41    310.76 o 
   4  14   7     1137.22      812.76    277.65 o 
   5  14   7     4007.64     3873.31    406.48 o 
 -24   0   8     2570.59     2313.51    425.95 o 
 -22   0   8     2643.71     2492.82    359.66 o 
 -20   0   8     7752.31     8343.96    480.43 o 
 -18   0   8     3636.81     4081.02    355.81 o 
 -16   0   8     1541.88     1798.64    192.85 o 
 -14   0   8     8973.66     9167.84    239.11 o 
 -12   0   8     1173.22     1165.08    118.88 o 
 -10   0   8    38490.45    40879.31    527.17 o 
  -8   0   8     1287.67     1726.00    118.38 o 
  -6   0   8     2723.99     3583.24    131.12 o 
  -4   0   8      246.50      382.19     63.12 o 
  -2   0   8    55888.37    56175.71    814.53 o 
   0   0   8     3763.43     3600.36    117.18 o 
   2   0   8    83657.72    84611.47   1083.89 o 
   4   0   8      400.33      249.52     96.37 o 
   6   0   8    23311.26    20826.73    396.49 o 
   8   0   8    21613.90    20095.42    394.94 o 
  10   0   8     1437.60     1568.97    169.52 o 
  12   0   8     9898.16     9719.97    318.37 o 
  14   0   8      365.78      323.52    179.04 o 
  16   0   8     5433.87     6139.70    409.41 o 
  18   0   8     4005.28     4196.94    402.46 o 
 -24   1   8     4303.75     4561.21    413.66 o 
 -23   1   8     3048.32     3084.74    299.97 o 
 -22   1   8     3663.64     3325.00    300.69 o 
 -21   1   8     2953.70     3104.75    279.57 o 
 -20   1   8    14143.31    13685.10    434.80 o 
 -19   1   8     9451.60     9902.84    350.38 o 
 -18   1   8    16160.98    15833.50    336.00 o 
 -17   1   8     6646.83     6606.51    237.04 o 
 -16   1   8    11862.33    11400.75    256.94 o 
 -15   1   8    14379.25    14276.10    245.93 o 
 -14   1   8     9762.14     9380.37    185.35 o 
 -13   1   8    10522.25    10025.29    168.92 o 
 -12   1   8    12843.73    12554.79    180.86 o 
 -11   1   8    13797.86    12388.30    173.61 o 
 -10   1   8    14103.97    13563.37    178.95 o 
  -9   1   8     4765.77     4849.91    114.36 o 
  -8   1   8    17802.69    17537.30    197.53 o 
  -7   1   8    14922.22    13969.80    171.49 o 
  -6   1   8     1841.38     1891.10    112.83 o 
  -5   1   8    37119.06    37346.55    337.52 o 
  -4   1   8    42881.83    44724.47    387.54 o 
  -3   1   8    46373.16    44534.93    415.65 o 
  -2   1   8    35466.23    37621.70    343.80 o 
  -1   1   8    18758.00    18284.46    191.24 o 
   0   1   8     3711.54     3811.89     79.04 o 
   1   1   8     8583.46     8627.85    125.92 o 
   2   1   8    34060.39    37230.13    327.80 o 
   3   1   8    25317.83    27436.21    298.20 o 
   4   1   8    28509.25    29168.28    295.10 o 
   5   1   8    19816.86    20982.89    265.49 o 
   6   1   8    16537.89    16601.47    211.64 o 
   7   1   8    23187.09    23525.90    359.62 o 
   8   1   8    10369.55     9813.10    189.50 o 
   9   1   8     5292.61     5791.33    164.94 o 
  10   1   8     6094.14     6237.68    181.54 o 
  11   1   8    11496.82    11413.52    230.49 o 
  12   1   8    15060.61    14515.58    265.98 o 
  13   1   8     3156.70     3247.24    168.59 o 
  14   1   8    19114.29    18078.84    314.86 o 
  15   1   8     7150.91     7522.88    245.57 o 
  16   1   8     8204.37     8181.61    284.37 o 
  17   1   8     4124.69     4508.37    237.23 o 
  18   1   8     5720.60     4907.53    271.76 o 
  19   1   8     4211.29     4121.56    292.03 o 
 -24   2   8        7.82      -92.16    240.16 o 
 -23   2   8     2257.89     1922.01    314.52 o 
 -22   2   8      296.50       26.37    221.32 o 
 -21   2   8     2437.20     2551.93    270.00 o 
 -20   2   8      190.56      133.18    214.90 o 
 -19   2   8     5023.83     5580.57    257.20 o 
 -18   2   8     1343.50     1380.50    168.17 o 
 -17   2   8     2066.93     2332.11    177.99 o 
 -16   2   8      217.55      154.79    136.62 o 
 -15   2   8     7951.50     8231.29    225.03 o 
 -14   2   8      562.03      430.99    106.44 o 
 -13   2   8     4116.38     5172.75    156.87 o 
 -12   2   8      621.94      561.59     90.21 o 
 -11   2   8     6261.18     6858.04    132.38 o 
 -10   2   8     8354.69     7938.06    136.53 o 
  -9   2   8    10062.03    10534.43    157.31 o 
  -8   2   8       19.50      -10.74     65.05 o 
  -7   2   8      292.73      370.34     69.08 o 
  -6   2   8     2868.91     3165.47     90.79 o 
  -5   2   8    22592.36    22968.77    230.49 o 
  -4   2   8     1071.94     1196.79     55.27 o 
  -3   2   8    30302.17    28957.57    264.12 o 
  -2   2   8      181.41      312.84     39.36 o 
  -1   2   8    23393.36    23090.70    195.36 o 
   0   2   8    18814.60    20082.33    182.49 o 
   1   2   8    26701.76    26805.61    227.07 o 
   2   2   8    10095.71    10834.19    126.18 o 
   3   2   8    34558.73    33714.27    296.40 o 
   4   2   8     2660.54     2854.39     86.95 o 
   5   2   8     7094.75     6357.11    118.11 o 
   6   2   8       37.99       13.78     58.60 o 
   7   2   8    27268.52    25909.14    275.74 o 
   8   2   8        1.92      -77.02     77.02 o 
   9   2   8     2929.18     3042.34    135.39 o 
  10   2   8      383.65      312.25    105.14 o 
  11   2   8     7060.87     7355.40    198.81 o 
  12   2   8        6.11       55.63    113.58 o 
  13   2   8     6652.98     6861.56    224.57 o 
  14   2   8        1.48      -92.08    138.13 o 
  15   2   8     1757.53     2048.59    185.23 o 
  16   2   8       40.06     -147.17    147.17 o 
  17   2   8     3135.21     3839.25    227.92 o 
  18   2   8       79.76     -178.17    178.17 o 
  19   2   8     1342.54     1747.01    206.54 o 
 -24   3   8     2127.31     2812.45    439.33 o 
 -23   3   8     5754.92     5901.86    366.13 o 
 -22   3   8     4269.34     4979.70    331.56 o 
 -21   3   8     9728.76     9925.01    365.30 o 
 -20   3   8     1061.07      936.53    181.04 o 
 -19   3   8    13094.23    13426.18    324.38 o 
 -18   3   8      825.63      557.07    154.74 o 
 -17   3   8    24929.24    24554.12    419.24 o 
 -16   3   8     4933.19     5296.73    206.12 o 
 -15   3   8    11044.43    10678.39    246.51 o 
 -14   3   8    11317.93    11208.49    242.42 o 
 -13   3   8    18919.26    18434.82    297.20 o 
 -12   3   8    14239.65    13517.14    254.59 o 
 -11   3   8     7160.15     6630.67    161.65 o 
 -10   3   8    11148.18    10117.42    155.18 o 
  -9   3   8    26961.56    25788.93    266.71 o 
  -8   3   8     3159.50     2671.30     92.70 o 
  -7   3   8     9590.54     9691.40    144.24 o 
  -6   3   8     3323.62     2596.72     90.62 o 
  -5   3   8    45492.46    46653.07    393.52 o 
  -4   3   8    13716.66    11962.77    131.27 o 
  -3   3   8    24036.71    25602.52    246.40 o 
  -2   3   8    14119.06    12331.35    136.98 o 
  -1   3   8    55392.38    58689.95    476.79 o 
   0   3   8    40713.97    40783.71    363.88 o 
   1   3   8    39769.74    42700.24    368.04 o 
   2   3   8     8412.41     7818.68    165.27 o 
   3   3   8    22180.65    23275.43    236.73 o 
   4   3   8     7735.80     7778.12    174.55 o 
   5   3   8    15221.36    14836.30    175.24 o 
   6   3   8    10046.43    10319.03    168.77 o 
   7   3   8    16350.21    16208.54    200.55 o 
   8   3   8      542.17      687.34     88.02 o 
   9   3   8    14224.48    13066.37    227.44 o 
  10   3   8    10114.81    10672.02    213.40 o 
  11   3   8     9049.19     8972.92    222.48 o 
  12   3   8      586.40      488.73    127.70 o 
  13   3   8    13230.82    12379.73    289.02 o 
  14   3   8      955.62      963.46    155.99 o 
  15   3   8     2266.25     1838.39    181.70 o 
  16   3   8     5268.26     5402.17    246.33 o 
  17   3   8    10388.41     9458.34    302.67 o 
  18   3   8     1417.61     1123.60    197.52 o 
  19   3   8     2814.24     2225.69    223.50 o 
 -23   4   8       68.57      131.14    323.77 o 
 -22   4   8      502.48     -170.53    197.24 o 
 -21   4   8      688.48      615.32    242.55 o 
 -20   4   8     2976.36     2401.44    198.72 o 
 -19   4   8        8.88       -2.12    148.35 o 
 -18   4   8     2226.17     2484.51    186.86 o 
 -17   4   8       59.51     -124.78    127.39 o 
 -16   4   8     8775.93     9005.79    243.33 o 
 -15   4   8       96.73       26.87    118.92 o 
 -14   4   8    13376.34    13178.64    262.91 o 
 -13   4   8     2324.06     2507.45    140.95 o 
 -12   4   8     9337.85     9136.16    203.50 o 
 -11   4   8       14.67      -78.78     86.69 o 
 -10   4   8    23729.42    24447.99    323.94 o 
  -9   4   8     2741.12     2700.80    108.95 o 
  -8   4   8    26909.24    25714.78    285.34 o 
  -7   4   8     2325.65     3053.07    120.41 o 
  -6   4   8     9076.74     9541.64    179.70 o 
  -5   4   8      456.51      698.77     50.16 o 
  -4   4   8     8220.81     7124.49    132.98 o 
  -3   4   8     3203.84     3927.54    129.44 o 
  -2   4   8     3705.95     3609.08    167.45 o 
  -1   4   8       98.15       81.57     60.52 o 
   0   4   8     3891.28     4266.82    108.97 o 
   1   4   8     4812.86     4990.77     97.51 o 
   2   4   8    11524.27    10927.82    142.56 o 
   3   4   8     1490.02     1590.09     73.25 o 
   4   4   8     8662.16     8619.62    135.14 o 
   5   4   8     6965.98     6559.31    136.34 o 
   6   4   8     7052.03     6539.39    144.36 o 
   7   4   8        5.56        8.28     77.73 o 
   8   4   8     3871.51     3947.97    139.32 o 
   9   4   8       25.73       87.95    102.20 o 
  10   4   8     4190.47     4439.31    154.45 o 
  11   4   8     1122.71     1142.11    127.00 o 
  12   4   8     8627.16     8818.83    239.71 o 
  13   4   8       10.44      -22.04    128.59 o 
  14   4   8     9864.17    10314.94    273.20 o 
  15   4   8      137.89      198.32    144.87 o 
  16   4   8     7956.33     9510.88    289.84 o 
  17   4   8        6.07      -46.70    161.16 o 
  18   4   8     4640.49     6036.97    280.29 o 
 -23   5   8     1699.53     1120.90    236.78 o 
 -22   5   8     7958.32     7570.63    350.88 o 
 -21   5   8     1399.77     1145.09    209.58 o 
 -20   5   8     5462.25     5228.42    269.54 o 
 -19   5   8     1912.46     2168.29    207.40 o 
 -18   5   8    13238.45    12526.54    331.70 o 
 -17   5   8     1840.73     2354.91    185.18 o 
 -16   5   8     6834.62     7082.99    246.88 o 
 -15   5   8     1690.89     1840.18    224.86 o 
 -14   5   8    21555.49    21725.52    368.26 o 
 -13   5   8     8070.71     7975.42    223.84 o 
 -12   5   8    13330.85    13090.03    244.79 o 
 -11   5   8     9080.38     9369.43    199.23 o 
 -10   5   8    23411.60    22464.18    307.39 o 
  -9   5   8    12000.13    11349.20    196.72 o 
  -8   5   8    35080.32    34764.50    373.71 o 
  -7   5   8     8583.25     7765.09    141.16 o 
  -6   5   8    24988.78    25134.86    307.08 o 
  -5   5   8    31983.30    29702.58    324.60 o 
  -4   5   8    37482.07    37946.19    423.32 o 
  -3   5   8    13366.32    13061.41    234.92 o 
  -2   5   8    29352.33    30238.76    333.54 o 
  -1   5   8    19849.42    18093.44    215.67 o 
   0   5   8    51610.88    52252.41    514.45 o 
   1   5   8     6695.07     6425.62    134.48 o 
   2   5   8    17105.10    17691.45    222.99 o 
   3   5   8      506.37      265.04     55.84 o 
   4   5   8    29313.11    28835.56    298.46 o 
   5   5   8    14097.33    14393.91    216.39 o 
   6   5   8    12699.92    12656.91    208.70 o 
   7   5   8      896.81     1082.75    103.59 o 
   8   5   8    22815.04    22070.58    307.80 o 
   9   5   8     4232.51     4765.59    187.53 o 
  10   5   8     4883.52     5291.84    221.24 o 
  11   5   8     4376.62     5198.65    296.31 o 
  12   5   8    10859.30    10486.65    293.15 o 
  13   5   8     2041.64     2596.32    238.47 o 
  14   5   8     4488.70     3793.52    275.48 o 
  15   5   8     1428.87     1378.30    219.51 o 
  16   5   8    12091.37    11676.29    402.51 o 
  17   5   8     1309.08     1693.38    224.81 o 
  18   5   8     4665.40     4244.92    284.22 o 
 -22   6   8      501.92       56.99    189.98 o 
 -21   6   8      377.40      481.59    192.03 o 
 -20   6   8       17.35     -168.29    168.29 o 
 -19   6   8     2313.74     1782.38    198.25 o 
 -18   6   8     1121.28      813.93    171.34 o 
 -17   6   8     3775.20     3565.70    249.88 o 
 -16   6   8      851.29      654.14    148.64 o 
 -15   6   8     7307.33     7513.02    244.52 o 
 -14   6   8     2267.93     2188.95    164.65 o 
 -13   6   8      552.87      601.65    126.84 o 
 -12   6   8      798.41      877.83    125.95 o 
 -11   6   8     4863.98     4664.20    247.76 o 
 -10   6   8     7595.21     7594.11    191.88 o 
  -9   6   8    12135.45    11118.71    216.38 o 
  -8   6   8       52.08      145.95     83.29 o 
  -7   6   8    15225.33    14900.77    263.28 o 
  -6   6   8     3968.29     4376.60    152.35 o 
  -5   6   8    11861.19    11524.28    184.20 o 
  -4   6   8       25.34      104.35     65.51 o 
  -3   6   8    15751.66    14811.11    205.06 o 
  -2   6   8     1081.17     1368.51     91.96 o 
  -1   6   8     7638.50     7807.79    159.94 o 
   0   6   8       51.64      191.40     72.19 o 
   1   6   8    10810.76    11038.69    208.46 o 
   2   6   8       40.99      -48.91     75.68 o 
   3   6   8     6887.40     6819.80    159.11 o 
   4   6   8      493.06      646.51     79.47 o 
   5   6   8     2797.02     3147.05    128.22 o 
   6   6   8      184.15      121.23     98.15 o 
   7   6   8     6995.68     7567.41    188.21 o 
   8   6   8      417.14      150.21    110.73 o 
   9   6   8    10729.53    11497.57    260.58 o 
  10   6   8     1220.55      952.32    146.99 o 
  11   6   8     1544.96     1941.46    193.93 o 
  12   6   8      698.94      492.40    156.54 o 
  13   6   8     4675.58     5762.00    257.89 o 
  14   6   8     1170.93     1151.26    204.96 o 
  15   6   8     6685.20     8156.30    348.75 o 
  16   6   8      407.05      194.08    190.72 o 
  17   6   8     3477.81     4645.51    286.07 o 
 -21   7   8     3688.97     3611.60    249.22 o 
 -20   7   8      280.56       22.82    176.77 o 
 -19   7   8     4705.44     4118.96    237.73 o 
 -18   7   8     2409.72     2666.81    199.50 o 
 -17   7   8     3182.51     3141.24    198.34 o 
 -16   7   8     2820.95     3062.43    188.67 o 
 -15   7   8     9766.61     9737.88    263.25 o 
 -14   7   8     2447.46     2551.46    168.94 o 
 -13   7   8    23420.33    23802.86    381.72 o 
 -12   7   8     5398.55     5471.84    191.42 o 
 -11   7   8     4869.49     4937.50    198.62 o 
 -10   7   8     5069.19     5274.25    171.00 o 
  -9   7   8    22289.72    22685.78    329.95 o 
  -8   7   8     1774.91     1736.86    136.50 o 
  -7   7   8    16150.35    15369.54    275.79 o 
  -6   7   8     3413.92     3632.76    149.02 o 
  -5   7   8    16262.42    16360.07    251.41 o 
  -4   7   8     4778.62     4510.00    132.41 o 
  -3   7   8    47684.63    47228.70    503.84 o 
  -2   7   8      782.41      556.35     89.38 o 
  -1   7   8    22787.21    22113.93    301.01 o 
   0   7   8    10343.40     9828.84    190.95 o 
   1   7   8    16157.47    16382.22    284.79 o 
   2   7   8      664.09      479.35     97.89 o 
   3   7   8    25878.21    25556.04    363.42 o 
   4   7   8     5286.53     5200.64    145.31 o 
   5   7   8    11764.83    12113.81    216.10 o 
   6   7   8      972.95     1018.00    110.44 o 
   7   7   8    11998.62    11476.69    243.64 o 
   8   7   8      974.55     1293.15    139.07 o 
   9   7   8     5504.85     5610.92    273.39 o 
  10   7   8     4862.97     5706.91    286.03 o 
  11   7   8     4241.57     4423.37    221.31 o 
  12   7   8     2386.01     3276.71    210.40 o 
  13   7   8     4017.09     3164.32    204.36 o 
  14   7   8      410.39      301.19    169.02 o 
  15   7   8     8047.76     7899.78    295.36 o 
  16   7   8     1695.15     1963.23    218.10 o 
  17   7   8     3973.42     3816.89    341.70 o 
 -21   8   8      542.11      -58.77    253.21 o 
 -20   8   8     2703.22     2731.69    221.63 o 
 -19   8   8     1539.03     1310.64    182.05 o 
 -18   8   8     1601.70     1237.03    170.96 o 
 -17   8   8      608.55      305.97    146.53 o 
 -16   8   8     1105.05      738.92    147.04 o 
 -15   8   8      831.57      552.20    137.25 o 
 -14   8   8     3888.53     3664.83    181.04 o 
 -13   8   8       61.19     -105.19    116.16 o 
 -12   8   8     4406.50     4307.14    176.66 o 
 -11   8   8      950.44     1000.18    119.75 o 
 -10   8   8     3995.92     4388.18    192.47 o 
  -9   8   8     2318.94     2890.25    175.68 o 
  -8   8   8     4313.08     4478.54    179.08 o 
  -7   8   8     3220.09     3699.02    164.08 o 
  -6   8   8     6765.76     6506.89    198.20 o 
  -5   8   8     2799.90     2979.69    144.95 o 
  -4   8   8     2888.31     3032.61    144.80 o 
  -3   8   8      413.95      290.87     80.80 o 
  -2   8   8     4349.91     4725.94    191.81 o 
  -1   8   8     4482.92     4699.62    148.60 o 
   0   8   8     2886.17     3143.22    132.14 o 
   1   8   8      340.99      238.65    111.69 o 
   2   8   8     9546.26     9518.45    213.39 o 
   3   8   8     1301.39     1397.59    128.66 o 
   4   8   8    14340.62    14440.74    269.57 o 
   5   8   8      853.63      786.63    114.88 o 
   6   8   8     3876.31     4446.86    182.81 o 
   7   8   8       90.47      -80.97    115.86 o 
   8   8   8     9963.86    11346.47    375.68 o 
   9   8   8       33.77     -124.02    124.02 o 
  10   8   8     3060.23     3617.91    207.24 o 
  11   8   8      379.25      270.51    152.73 o 
  12   8   8     1381.41     1893.79    190.53 o 
  13   8   8       18.42       64.11    160.07 o 
  14   8   8     3466.53     4272.28    258.03 o 
  15   8   8     2375.96     2941.37    238.80 o 
  16   8   8     2593.82     3518.92    264.36 o 
 -20   9   8     4216.08     6059.05    957.01 o 
 -19   9   8      739.01      493.35    156.36 o 
 -18   9   8     4617.74     4753.25    216.65 o 
 -17   9   8     2937.85     2833.47    180.88 o 
 -16   9   8     4571.91     4480.92    276.57 o 
 -15   9   8      946.83     1048.14    143.01 o 
 -14   9   8    16973.76    16873.78    316.67 o 
 -13   9   8     1166.03     1314.22    160.53 o 
 -12   9   8    14565.32    14985.71    276.04 o 
 -11   9   8     4700.74     4765.29    199.69 o 
 -10   9   8     8344.06     8259.51    231.18 o 
  -9   9   8      343.98      335.80    183.17 o 
  -8   9   8    18261.88    18246.08    325.24 o 
  -7   9   8       50.41       14.19    137.82 o 
  -6   9   8    15418.79    15034.48    282.74 o 
  -5   9   8       74.05      141.89    113.39 o 
  -4   9   8    15488.46    15595.83    280.12 o 
  -3   9   8      509.46      452.97     99.79 o 
  -2   9   8    22869.40    22595.96    327.67 o 
  -1   9   8     2077.73     1838.56    123.27 o 
   0   9   8     8996.42     8852.49    193.84 o 
   1   9   8      730.97      485.81    102.93 o 
   2   9   8    19678.31    19716.17    306.44 o 
   3   9   8      253.70       84.38    105.37 o 
   4   9   8    11644.42    10996.63    260.92 o 
   5   9   8     2604.62     2652.90    175.29 o 
   6   9   8    10906.88    10415.29    235.86 o 
   7   9   8     1144.48     1334.14    166.60 o 
   8   9   8    13115.52    12914.29    280.30 o 
   9   9   8      770.64      949.36    144.81 o 
  10   9   8    10264.42     9763.92    284.87 o 
  11   9   8      652.81     1012.22    183.86 o 
  12   9   8     9797.57     9751.96    335.46 o 
  13   9   8       96.97      -58.37    177.52 o 
  14   9   8     5613.59     5546.15    301.20 o 
  15   9   8      843.18      794.09    220.03 o 
 -18  10   8     2087.23     1593.42    261.69 o 
 -17  10   8      498.20      434.58    183.44 o 
 -16  10   8      315.89       76.14    169.10 o 
 -15  10   8      824.21      397.74    162.86 o 
 -14  10   8     2141.35     1914.92    226.63 o 
 -13  10   8     2074.83     1456.63    207.14 o 
 -12  10   8     1518.95     1291.74    199.43 o 
 -11  10   8     1623.30     1184.28    206.57 o 
 -10  10   8      121.26     -143.12    143.12 o 
  -9  10   8     1165.77     1307.07    175.83 o 
  -8  10   8     1083.82      984.70    168.09 o 
  -7  10   8     3196.83     3022.75    196.68 o 
  -6  10   8     2875.64     2815.50    148.67 o 
  -5  10   8     3022.52     2927.07    183.13 o 
  -4  10   8     2229.90     2406.36    138.66 o 
  -3  10   8     3129.37     3404.99    148.81 o 
  -2  10   8      646.65      698.30    101.91 o 
  -1  10   8     5561.67     5934.02    191.77 o 
   0  10   8      373.52      283.07    106.00 o 
   1  10   8     1600.86     2036.74    167.34 o 
   2  10   8      198.73      191.39    123.77 o 
   3  10   8     8618.84     9029.03    250.45 o 
   4  10   8     2717.25     2840.63    182.47 o 
   5  10   8     3310.29     3431.46    413.70 o 
   6  10   8       28.48     -114.33    114.33 o 
   7  10   8     8003.30     8815.31    352.13 o 
   8  10   8      307.48      311.21    143.47 o 
   9  10   8     3964.22     4648.61    329.53 o 
  10  10   8      957.04      874.77    181.66 o 
  11  10   8     1336.99     1833.18    204.91 o 
  12  10   8      324.93      379.73    176.98 o 
  13  10   8      464.53      542.81    198.35 o 
  14  10   8     1968.53     2247.25    664.42 o 
 -17  11   8     8190.58     8857.73    307.86 o 
 -16  11   8      579.20      590.54    178.42 o 
 -15  11   8     8324.86     8306.34    357.32 o 
 -14  11   8       24.74     -105.80    195.75 o 
 -13  11   8    11224.79    12314.40    381.46 o 
 -12  11   8     1569.80     1234.82    207.83 o 
 -11  11   8     9203.33     9723.77    332.17 o 
 -10  11   8      941.73      677.36    183.41 o 
  -9  11   8     6646.80     6792.62    282.44 o 
  -8  11   8      943.32      895.78    169.41 o 
  -7  11   8     8470.32     8434.37    278.97 o 
  -6  11   8     1144.78      875.25    165.31 o 
  -5  11   8     5147.73     5433.00    243.74 o 
  -4  11   8       41.09       18.84    129.82 o 
  -3  11   8    16142.97    15478.09    339.91 o 
  -2  11   8     1403.42     1340.59    119.86 o 
  -1  11   8    10021.87     9989.94    270.28 o 
   0  11   8      113.96      -14.54    138.22 o 
   1  11   8     8251.10     8176.73    263.62 o 
   2  11   8       90.23       84.67    140.67 o 
   3  11   8     9615.37     9697.99    277.80 o 
   4  11   8      443.44      180.53    158.67 o 
   5  11   8    12930.70    12802.23    408.76 o 
   6  11   8     1668.50     2008.92    189.45 o 
   7  11   8    12256.45    11818.92    292.02 o 
   8  11   8      516.86      296.60    189.48 o 
   9  11   8    14256.84    13493.20    440.62 o 
  10  11   8      432.20      417.33    165.74 o 
  11  11   8     5300.27     4742.16    273.25 o 
  12  11   8       13.88      -67.97    185.00 o 
 -15  12   8      543.44      -31.92    240.51 o 
 -14  12   8      843.03      583.32    248.42 o 
 -13  12   8      888.01      516.40    231.87 o 
 -12  12   8     1568.08     1276.68    242.27 o 
 -11  12   8       98.42     -194.64    194.64 o 
 -10  12   8     1178.39      877.69    218.30 o 
  -9  12   8      351.75      270.21    196.71 o 
  -8  12   8     1529.34     1090.75    222.45 o 
  -7  12   8     1853.50     1991.12    222.61 o 
  -6  12   8     1557.83     1522.65    191.62 o 
  -5  12   8      501.92       81.07    158.39 o 
  -4  12   8      987.80     1046.75    171.05 o 
  -3  12   8     1969.88     2150.33    189.44 o 
  -2  12   8     4575.79     4449.83    223.84 o 
  -1  12   8      993.46     1010.66    147.52 o 
   0  12   8     3239.38     3923.79    300.40 o 
   1  12   8     2735.12     2614.67    201.78 o 
   2  12   8     2502.80     2797.18    233.94 o 
   3  12   8     3308.96     3172.86    218.54 o 
   4  12   8     3338.44     4140.24    284.75 o 
   5  12   8     6528.05     6830.14    317.13 o 
   6  12   8     1326.08     1900.37    167.39 o 
   7  12   8     1632.34     2099.39    180.53 o 
   8  12   8     3840.00     4545.29    320.66 o 
   9  12   8      758.29     1166.38    221.37 o 
  10  12   8     1838.58     2042.13    230.79 o 
 -13  13   8       77.66     -231.87    231.87 o 
 -12  13   8     5888.26     5974.90    348.03 o 
 -11  13   8       42.26     -213.45    213.45 o 
 -10  13   8     6485.07     7241.75    352.28 o 
  -9  13   8       90.86       27.54    209.91 o 
  -8  13   8     5746.79     6015.71    316.90 o 
  -7  13   8     1640.32     1670.55    210.47 o 
  -6  13   8     6651.07     6558.11    284.21 o 
  -5  13   8       76.70     -169.33    183.55 o 
  -4  13   8     4319.43     4300.92    243.01 o 
  -3  13   8        2.90     -144.14    162.22 o 
  -2  13   8     6858.56     6390.59    412.03 o 
  -1  13   8       54.98     -138.35    138.35 o 
   0  13   8     7119.74     7284.99    380.92 o 
   1  13   8        4.07     -218.83    218.83 o 
   2  13   8     5287.24     5399.41    353.40 o 
   3  13   8       53.60     -230.35    230.35 o 
   4  13   8     9266.24     9728.03    328.51 o 
   5  13   8       61.23     -185.34    185.34 o 
   6  13   8     4549.50     4621.97    398.71 o 
   7  13   8      267.24      -42.87    154.61 o 
   8  13   8     7022.07     6799.84    359.70 o 
  -9  14   8      379.71      311.11    233.45 o 
  -8  14   8     2451.43     2086.06    240.22 o 
  -7  14   8     2747.61     3005.64    327.12 o 
  -6  14   8      592.93      193.44    197.08 o 
  -5  14   8       97.01       48.07    188.79 o 
  -4  14   8     1044.13      929.20    209.47 o 
  -3  14   8     1511.40     1465.62    212.29 o 
  -2  14   8      876.63      909.55    196.97 o 
  -1  14   8     2096.30     2009.39    229.59 o 
   0  14   8      228.98      -73.01    261.69 o 
   1  14   8      546.50      355.46    279.82 o 
   2  14   8     1436.74     1473.07    282.80 o 
   3  14   8     1762.52     1766.71    349.00 o 
   4  14   8      539.82      138.98    271.88 o 
   5  14   8     1934.14     1856.31    384.85 o 
 -23   0   9    12014.56    13045.14    606.23 o 
 -21   0   9    10271.04    10642.37    528.78 o 
 -19   0   9    19992.15    21043.94    916.61 o 
 -17   0   9    25548.24    25048.22    591.01 o 
 -15   0   9    12254.52    11391.78    371.72 o 
 -13   0   9    45356.13    44540.95    593.45 o 
 -11   0   9    10939.57    10498.99    228.43 o 
  -9   0   9    55543.69    53923.09    648.29 o 
  -7   0   9    35653.02    35628.88    477.44 o 
  -5   0   9     2027.18     2208.69    106.72 o 
  -3   0   9   136755.70   137786.56   1689.29 o 
  -1   0   9    32232.20    34089.21    539.72 o 
   1   0   9    59268.73    61182.09    901.41 o 
   3   0   9    31391.78    32055.01    443.80 o 
   5   0   9    74536.17    77283.95   1192.28 o 
   7   0   9    33287.30    32740.44    540.14 o 
   9   0   9    53502.27    52566.63    803.62 o 
  11   0   9     7526.89     7662.38    322.03 o 
  13   0   9    23570.98    21936.45    486.36 o 
  15   0   9     7869.00     7935.65    346.96 o 
  17   0   9     7464.96     6763.51    451.20 o 
  19   0   9     5375.93     4500.93    555.62 o 
 -24   1   9     1540.90     1674.41    492.31 o 
 -23   1   9      263.71      -43.10    258.61 o 
 -22   1   9      389.26      497.85    227.75 o 
 -21   1   9      312.28      264.32    219.93 o 
 -20   1   9      326.24      396.16    238.93 o 
 -19   1   9     1610.08     1413.44    233.23 o 
 -18   1   9      287.65      230.27    163.41 o 
 -17   1   9     1594.13     1483.97    161.75 o 
 -16   1   9       72.89      -56.02    120.25 o 
 -15   1   9     1639.73     1511.40    132.53 o 
 -14   1   9     1114.98     1141.17    108.64 o 
 -13   1   9      359.96      362.18     81.22 o 
 -12   1   9     9168.01     9854.04    160.76 o 
 -11   1   9       74.85        4.29     65.96 o 
 -10   1   9     1471.20     1706.23     85.24 o 
  -9   1   9     3787.91     4949.96    114.79 o 
  -8   1   9     6894.95     7138.05    126.94 o 
  -7   1   9     4312.39     4768.73    111.33 o 
  -6   1   9     3453.93     3324.20     97.05 o 
  -5   1   9      937.82      989.70     64.02 o 
  -4   1   9      414.15      456.43     51.24 o 
  -3   1   9     8755.30     8597.19    122.16 o 
  -2   1   9    20226.07    19671.76    196.89 o 
  -1   1   9    14672.82    13989.37    157.31 o 
   0   1   9      921.58     1247.89     63.00 o 
   1   1   9     2003.25     1514.11     61.87 o 
   2   1   9     1779.39     1301.16     67.89 o 
   3   1   9    16935.62    16209.30    186.41 o 
   4   1   9    14946.96    15587.72    185.17 o 
   5   1   9     5553.17     5330.78    155.15 o 
   6   1   9     6537.99     6353.94    146.86 o 
   7   1   9      171.44       62.17     96.38 o 
   8   1   9    10110.63    10168.03    197.13 o 
   9   1   9     7650.63     7638.63    183.49 o 
  10   1   9     3281.20     3429.65    152.40 o 
  11   1   9      143.25      110.61    109.57 o 
  12   1   9       46.70     -110.59    110.59 o 
  13   1   9     1305.47     1522.09    145.02 o 
  14   1   9     2533.88     2510.88    163.59 o 
  15   1   9      798.42      789.40    149.40 o 
  16   1   9       77.84        5.60    159.59 o 
  17   1   9      149.08       82.59    168.74 o 
  18   1   9     1193.20     1472.16    231.16 o 
  19   1   9     2812.96     3081.41    277.25 o 
 -24   2   9    11332.56    12390.15    486.81 o 
 -23   2   9     1577.64     1265.81    261.16 o 
 -22   2   9     8096.97     8420.80    395.95 o 
 -21   2   9       22.13     -116.34    209.82 o 
 -20   2   9    10431.25    10767.50    362.73 o 
 -19   2   9     1208.32     1059.57    179.26 o 
 -18   2   9    20772.72    20150.59    409.39 o 
 -17   2   9       22.21     -127.08    127.08 o 
 -16   2   9    15081.22    14166.18    285.37 o 
 -15   2   9       78.24     -112.81    112.81 o 
 -14   2   9    33508.89    32278.49    431.59 o 
 -13   2   9      114.79      -85.47     85.47 o 
 -12   2   9    49041.91    47847.89    513.71 o 
 -11   2   9        9.44      -63.08     63.08 o 
 -10   2   9    19949.06    19574.57    220.22 o 
  -9   2   9     1644.86     2030.39     88.99 o 
  -8   2   9    62244.38    59985.29    512.25 o 
  -7   2   9     4346.32     5431.32    119.27 o 
  -6   2   9    20918.64    20827.49    237.03 o 
  -5   2   9     3204.95     3157.03     89.59 o 
  -4   2   9    42115.32    41761.86    356.50 o 
  -3   2   9     4154.86     3220.73     88.65 o 
  -2   2   9    68540.48    69088.37    529.98 o 
  -1   2   9     7610.08     8446.53     95.68 o 
   0   2   9    55111.89    57023.14    447.69 o 
   1   2   9      267.04      310.00     50.98 o 
   2   2   9    46001.72    46169.70    382.30 o 
   3   2   9     1177.94     1151.60     75.51 o 
   4   2   9    27769.86    28543.21    279.25 o 
   5   2   9      736.48      902.11     69.10 o 
   6   2   9    27776.83    27631.71    284.99 o 
   7   2   9      505.23      448.80     82.21 o 
   8   2   9    33079.18    32421.83    389.77 o 
   9   2   9     2285.69     2299.53    132.34 o 
  10   2   9    22893.61    21896.31    319.99 o 
  11   2   9     3120.73     3147.76    199.76 o 
  12   2   9    26192.16    25477.12    368.58 o 
  13   2   9      394.25      186.37    130.96 o 
  14   2   9    13530.47    13496.88    312.95 o 
  15   2   9     1772.98     1213.16    171.52 o 
  16   2   9     6544.18     6773.49    267.20 o 
  17   2   9      170.68      168.24    182.14 o 
  18   2   9     8450.92     8052.12    328.96 o 
  19   2   9      436.82      443.51    219.21 o 
 -24   3   9      608.93      546.88    322.69 o 
 -23   3   9      690.03     1195.44    254.54 o 
 -22   3   9     1638.44     1362.46    226.94 o 
 -21   3   9       46.29      -62.83    189.04 o 
 -20   3   9     1106.84      979.86    199.00 o 
 -19   3   9      819.37      418.28    172.71 o 
 -18   3   9     2107.68     2098.58    177.35 o 
 -17   3   9      151.79      173.75    136.96 o 
 -16   3   9      273.52       97.26    126.92 o 
 -15   3   9     1625.62     1698.54    142.33 o 
 -14   3   9    10118.71     9560.11    231.78 o 
 -13   3   9    13483.92    13865.69    255.74 o 
 -12   3   9      166.09      260.19     97.81 o 
 -11   3   9      657.09      518.74     92.08 o 
 -10   3   9     1372.66     1655.74     86.57 o 
  -9   3   9       34.31        4.86     61.91 o 
  -8   3   9      236.38      129.73     62.67 o 
  -7   3   9     6688.22     6646.90    117.79 o 
  -6   3   9     3417.42     3489.44     91.40 o 
  -5   3   9     3714.30     3993.38     93.90 o 
  -4   3   9    28506.60    28900.41    253.32 o 
  -3   3   9     2530.49     2804.45     84.30 o 
  -2   3   9    20462.88    21993.03    213.30 o 
  -1   3   9     7232.15     7192.25    104.81 o 
   0   3   9     2946.16     2907.59     96.74 o 
   1   3   9     1995.51     2401.01     80.93 o 
   2   3   9     2499.20     2478.84     83.92 o 
   3   3   9     1034.51      978.97     70.42 o 
   4   3   9    34191.63    33634.92    335.13 o 
   5   3   9     1323.58     1419.71     68.91 o 
   6   3   9     1628.37     1480.59     96.24 o 
   7   3   9     1223.06     1075.74     79.90 o 
   8   3   9     7099.69     7142.95    164.28 o 
   9   3   9     2048.05     2055.75    118.45 o 
  10   3   9     1148.95     1324.55    123.05 o 
  11   3   9     1004.88     1117.53    134.91 o 
  12   3   9      250.54      217.45    123.95 o 
  13   3   9     2657.85     2911.59    187.21 o 
  14   3   9      904.15      974.61    161.76 o 
  15   3   9     5512.65     6148.35    250.90 o 
  16   3   9     1585.19     1759.69    189.56 o 
  17   3   9     1229.29     1310.82    194.70 o 
  18   3   9      483.23      543.33    199.48 o 
 -23   4   9     7336.37     7416.01    464.66 o 
 -22   4   9     1912.46     1280.74    327.22 o 
 -21   4   9     9490.45    10335.28    371.53 o 
 -20   4   9      475.07      594.41    194.46 o 
 -19   4   9    14467.17    14437.37    333.77 o 
 -18   4   9     2466.59     2293.00    186.42 o 
 -17   4   9    14519.24    13897.85    294.14 o 
 -16   4   9     1011.40     1196.02    147.91 o 
 -15   4   9    11697.15    11533.15    255.14 o 
 -14   4   9     1118.43      671.35    133.67 o 
 -13   4   9    29288.39    28459.42    393.07 o 
 -12   4   9      756.58      531.54    102.26 o 
 -11   4   9    25061.67    23606.14    327.35 o 
 -10   4   9     1123.17     1147.46    100.48 o 
  -9   4   9    41444.54    39485.49    380.50 o 
  -8   4   9       60.97       22.85     57.46 o 
  -7   4   9    54671.13    54018.92    478.40 o 
  -6   4   9     6034.15     6326.81    117.84 o 
  -5   4   9    69162.50    69177.02    590.04 o 
  -4   4   9     1691.95     1578.81     72.31 o 
  -3   4   9    30030.41    28258.30    292.21 o 
  -2   4   9      174.33      255.74     52.75 o 
  -1   4   9    54402.57    54553.79    440.36 o 
   0   4   9     5898.93     6320.05    109.59 o 
   1   4   9    19307.14    19592.50    206.31 o 
   2   4   9     1020.57     1259.50     68.12 o 
   3   4   9    40031.32    39186.47    389.48 o 
   4   4   9     4213.16     4433.11    107.25 o 
   5   4   9     7259.98     7083.91    145.90 o 
   6   4   9     1678.34     1419.39     97.57 o 
   7   4   9    17614.13    17743.43    251.26 o 
   8   4   9      362.99      236.09    103.43 o 
   9   4   9    18381.74    18626.75    305.49 o 
  10   4   9     6939.97     6502.23    268.95 o 
  11   4   9    18736.49    18485.27    422.26 o 
  12   4   9       84.41      -83.31    120.85 o 
  13   4   9    14125.73    13669.03    299.19 o 
  14   4   9       22.20      -87.81    136.28 o 
  15   4   9     8502.74     8447.11    266.63 o 
  16   4   9       83.06       22.27    170.69 o 
  17   4   9     9885.68     9716.43    306.06 o 
  18   4   9       44.10      -17.75    175.25 o 
 -23   5   9      601.31      133.23    214.79 o 
 -22   5   9      750.54      561.43    212.84 o 
 -21   5   9      637.96      262.36    251.83 o 
 -20   5   9       46.86      -73.71    168.90 o 
 -19   5   9     2081.21     1622.22    206.00 o 
 -18   5   9     3292.88     3525.32    262.84 o 
 -17   5   9     1542.82     1412.48    169.75 o 
 -16   5   9      823.99      764.24    165.76 o 
 -15   5   9    11253.38    10813.13    267.75 o 
 -14   5   9     5320.53     5402.80    253.62 o 
 -13   5   9    24798.61    24515.35    387.16 o 
 -12   5   9      190.99      -39.09    104.83 o 
 -11   5   9     2674.69     3002.79    150.28 o 
 -10   5   9     1935.63     1824.77    122.72 o 
  -9   5   9     8777.91     8931.13    191.38 o 
  -8   5   9     4327.95     4463.94    143.26 o 
  -7   5   9      506.47      529.20     71.79 o 
  -6   5   9     6142.35     6191.10    141.48 o 
  -5   5   9     6542.36     6331.79    130.65 o 
  -4   5   9     1952.25     2783.04    153.20 o 
  -3   5   9     4587.13     4707.10    124.27 o 
  -2   5   9      338.08      461.20     52.37 o 
  -1   5   9     2576.71     2648.00     89.17 o 
   0   5   9     2531.18     3138.55    101.26 o 
   1   5   9      381.53      627.69     76.96 o 
   2   5   9     5014.40     5207.96    117.21 o 
   3   5   9     4590.35     4219.99    105.34 o 
   4   5   9     5037.04     5411.22    131.80 o 
   5   5   9     1669.17     1592.94    102.16 o 
   6   5   9      876.97      794.23    102.53 o 
   7   5   9     9750.50     9824.33    230.50 o 
   8   5   9     1239.56     1477.51    130.01 o 
   9   5   9     3396.97     3616.45    164.67 o 
  10   5   9      295.21      388.81    131.93 o 
  11   5   9     2060.98     2072.75    180.40 o 
  12   5   9     1982.00     2381.84    278.66 o 
  13   5   9     3970.22     4139.23    258.63 o 
  14   5   9     4264.07     4686.16    382.71 o 
  15   5   9     2093.34     2388.60    295.19 o 
  16   5   9     1028.20      748.07    216.30 o 
  17   5   9     3177.38     4291.21    303.33 o 
 -22   6   9     3622.76     3733.77    283.00 o 
 -21   6   9     1745.63     1159.40    207.73 o 
 -20   6   9     6686.06     7045.32    296.91 o 
 -19   6   9       96.58       43.85    165.42 o 
 -18   6   9    15867.62    15671.77    345.30 o 
 -17   6   9      856.38      739.79    156.27 o 
 -16   6   9    14909.94    15750.50    329.65 o 
 -15   6   9      106.27      -48.41    124.80 o 
 -14   6   9    18833.91    18795.90    342.26 o 
 -13   6   9     4632.83     4613.51    191.49 o 
 -12   6   9    20081.21    20339.53    337.94 o 
 -11   6   9    13437.70    13299.13    257.44 o 
 -10   6   9    14367.50    13735.99    251.02 o 
  -9   6   9     2068.63     2404.34    110.78 o 
  -8   6   9    22106.27    20994.29    272.05 o 
  -7   6   9     6749.82     7485.01    205.74 o 
  -6   6   9    54344.94    53113.48    598.95 o 
  -5   6   9     5098.89     5214.57    129.83 o 
  -4   6   9    30048.95    28432.08    492.24 o 
  -3   6   9      594.08      669.65     69.73 o 
  -2   6   9    43260.48    41461.79    552.12 o 
  -1   6   9     7121.06     7982.94    165.54 o 
   0   6   9    22783.03    22401.82    317.86 o 
   1   6   9     4124.18     4713.44    147.21 o 
   2   6   9    15583.42    15464.64    237.32 o 
   3   6   9       93.19       52.23     61.19 o 
   4   6   9    16767.58    16429.84    236.37 o 
   5   6   9     4063.05     4299.67    145.96 o 
   6   6   9     7601.37     7992.41    187.94 o 
   7   6   9      842.65      773.78    113.69 o 
   8   6   9    13452.45    13814.86    278.10 o 
   9   6   9     4554.25     4445.15    206.87 o 
  10   6   9     6833.49     7306.98    250.29 o 
  11   6   9     1622.85     1022.32    165.28 o 
  12   6   9     9684.91     9889.69    288.93 o 
  13   6   9      644.70      389.51    168.67 o 
  14   6   9     8596.95     8775.37    344.75 o 
  15   6   9     1534.21     1315.33    229.38 o 
  16   6   9     7614.32     7846.16    355.35 o 
  17   6   9     1606.06      887.29    238.40 o 
 -21   7   9       34.59     -175.38    175.38 o 
 -20   7   9     1186.53      727.24    189.87 o 
 -19   7   9        5.26     -152.12    152.12 o 
 -18   7   9     1366.94     1120.97    169.91 o 
 -17   7   9      180.49      233.75    151.88 o 
 -16   7   9     2453.55     2461.45    180.81 o 
 -15   7   9      158.13        9.77    130.79 o 
 -14   7   9     1706.03     1668.19    153.83 o 
 -13   7   9     3787.67     4051.33    212.42 o 
 -12   7   9     1067.64     1033.05    133.51 o 
 -11   7   9       11.76       61.22    101.27 o 
 -10   7   9      751.24      783.31    125.37 o 
  -9   7   9     1838.36     1587.99    141.69 o 
  -8   7   9     4555.51     4688.80    199.27 o 
  -7   7   9      153.29      174.13    104.15 o 
  -6   7   9     2752.70     3198.51    147.48 o 
  -5   7   9     3578.03     4078.82    206.47 o 
  -4   7   9     1415.52     1402.27     90.52 o 
  -3   7   9      185.07      197.53     67.71 o 
  -2   7   9     2125.51     2455.68    129.13 o 
  -1   7   9     3340.52     3937.72    139.39 o 
   0   7   9     2897.85     3219.63    131.97 o 
   1   7   9      151.20      121.56    101.04 o 
   2   7   9    10574.82    10341.25    217.32 o 
   3   7   9     5132.85     5578.81    179.32 o 
   4   7   9     1280.73     1151.28    103.12 o 
   5   7   9     8373.17     8997.19    229.15 o 
   6   7   9     4621.07     5022.67    219.19 o 
   7   7   9       28.49      -41.43    110.38 o 
   8   7   9      286.70       77.85    122.47 o 
   9   7   9     1316.38     1410.60    154.91 o 
  10   7   9     2944.75     3223.04    197.28 o 
  11   7   9      409.94      617.71    158.02 o 
  12   7   9     3539.25     3889.27    228.15 o 
  13   7   9     1048.06     1167.06    185.52 o 
  14   7   9     1093.31     1482.59    187.32 o 
  15   7   9      275.21       45.05    175.29 o 
  16   7   9     2316.77     3245.43    281.03 o 
 -21   8   9     5663.15     6362.96    294.54 o 
 -20   8   9      204.05     -155.66    171.43 o 
 -19   8   9     4691.28     4558.84    231.29 o 
 -18   8   9      612.48      369.97    178.07 o 
 -17   8   9    10674.59    10822.78    285.93 o 
 -16   8   9      996.83      739.86    152.04 o 
 -15   8   9    13028.60    13004.30    290.93 o 
 -14   8   9      348.76      147.27    126.03 o 
 -13   8   9    12874.37    12929.41    273.73 o 
 -12   8   9    11906.02    11216.33    246.06 o 
 -11   8   9    13553.47    12806.28    288.68 o 
 -10   8   9     4579.29     5019.39    203.22 o 
  -9   8   9     8038.94     7800.91    223.23 o 
  -8   8   9    13616.11    14268.05    286.00 o 
  -7   8   9    20528.57    20410.44    340.79 o 
  -6   8   9    11016.54    11573.20    242.14 o 
  -5   8   9    22959.84    22939.63    356.29 o 
  -4   8   9    15870.11    15920.29    278.96 o 
  -3   8   9    13095.12    12617.57    202.96 o 
  -2   8   9     5824.48     6457.51    175.16 o 
  -1   8   9    14668.36    14347.52    245.67 o 
   0   8   9     5817.55     6289.59    177.12 o 
   1   8   9    23416.44    23260.03    350.65 o 
   2   8   9      260.51       74.96    105.08 o 
   3   8   9    19658.30    19746.44    324.14 o 
   4   8   9     5288.18     5542.91    191.60 o 
   5   8   9    23134.89    22773.77    369.40 o 
   6   8   9      563.53      383.33    123.73 o 
   7   8   9    11476.62    11588.43    268.85 o 
   8   8   9     7011.08     6536.69    229.94 o 
   9   8   9     7422.68     7766.15    268.56 o 
  10   8   9     2786.71     2413.08    203.09 o 
  11   8   9     8260.02     9237.94    310.39 o 
  12   8   9     1235.07      616.23    170.25 o 
  13   8   9     8146.77     9263.77    316.54 o 
  14   8   9     3384.18     2487.62    231.54 o 
  15   8   9     8132.14     8791.31    364.01 o 
 -20   9   9       53.97     -210.57    210.57 o 
 -19   9   9     1344.29      998.23    201.55 o 
 -18   9   9      831.18      677.23    162.05 o 
 -17   9   9     1235.91      685.67    156.20 o 
 -16   9   9      673.74      652.31    145.70 o 
 -15   9   9     1234.07      986.15    187.29 o 
 -14   9   9      248.29      158.80    126.43 o 
 -13   9   9     2600.47     2455.36    151.71 o 
 -12   9   9      214.76      172.73    132.48 o 
 -11   9   9     5150.13     5506.30    249.45 o 
 -10   9   9      742.51      515.34    135.40 o 
  -9   9   9     1018.53      908.70    137.08 o 
  -8   9   9      151.57      140.04    117.57 o 
  -7   9   9     1691.30     1663.86    142.78 o 
  -6   9   9       27.02      195.99    115.15 o 
  -5   9   9     2847.32     2731.35    151.88 o 
  -4   9   9     2796.33     2952.59    145.01 o 
  -3   9   9     2663.28     2546.11    133.66 o 
  -2   9   9       38.29       28.12    102.10 o 
  -1   9   9     1977.08     2114.73    126.12 o 
   0   9   9     1538.69     1495.27    160.36 o 
   1   9   9     1728.91     1764.89    125.79 o 
   2   9   9       24.33      187.52    110.31 o 
   3   9   9     2406.45     2821.57    152.91 o 
   4   9   9     2945.27     3398.72    177.00 o 
   5   9   9     2206.04     2302.88    143.47 o 
   6   9   9     1993.36     2483.73    152.64 o 
   7   9   9     2953.46     3593.98    179.55 o 
   8   9   9      190.45      120.75    119.56 o 
   9   9   9      367.21      143.43    146.77 o 
  10   9   9      198.75      171.10    151.98 o 
  11   9   9     6721.42     7611.28    280.66 o 
  12   9   9       23.58     -137.67    163.69 o 
  13   9   9     1026.23     1137.99    211.27 o 
  14   9   9      181.13       -4.32    208.07 o 
 -18  10   9     6205.49     6603.73    319.23 o 
 -17  10   9     3969.97     3623.16    238.26 o 
 -16  10   9    10993.61    11233.87    342.29 o 
 -15  10   9      583.01      211.06    184.49 o 
 -14  10   9     9077.39     9479.43    344.47 o 
 -13  10   9     3017.16     2939.59    239.79 o 
 -12  10   9    11859.71    12073.63    350.51 o 
 -11  10   9     2568.31     2464.97    161.47 o 
 -10  10   9     6533.53     6944.95    250.04 o 
  -9  10   9     1216.85     1010.16    132.62 o 
  -8  10   9     6288.14     6515.88    241.49 o 
  -7  10   9     7889.90     7945.36    296.89 o 
  -6  10   9     4722.68     4686.62    231.50 o 
  -5  10   9     6765.76     6873.03    206.09 o 
  -4  10   9    16151.01    15762.59    278.95 o 
  -3  10   9     3972.05     4010.79    158.66 o 
  -2  10   9     5484.76     5711.62    224.06 o 
  -1  10   9     6424.34     6878.67    204.75 o 
   0  10   9    28509.64    28830.77    383.32 o 
   1  10   9     1673.45     1425.12    128.33 o 
   2  10   9    10265.98    10035.29    229.56 o 
   3  10   9     3250.24     3241.76    172.44 o 
   4  10   9    12908.20    12005.69    292.04 o 
   5  10   9     3994.88     3707.50    225.06 o 
   6  10   9    15971.46    16650.36    330.19 o 
   7  10   9     4401.92     3937.24    265.89 o 
   8  10   9     8712.57     9599.59    278.88 o 
   9  10   9     2870.04     2636.64    228.43 o 
  10  10   9    11204.49    12501.95    354.45 o 
  11  10   9     2056.24     1591.66    208.27 o 
  12  10   9     4280.88     4693.60    298.65 o 
  13  10   9     2504.87     1971.36    340.79 o 
 -17  11   9      219.87     -123.70    218.25 o 
 -16  11   9      465.73      197.18    226.65 o 
 -15  11   9      233.08      120.24    210.41 o 
 -14  11   9     1135.40      542.91    225.96 o 
 -13  11   9     1311.48      997.50    274.72 o 
 -12  11   9     1036.13      506.49    187.64 o 
 -11  11   9      128.49      222.38    178.95 o 
 -10  11   9     1944.04     1791.28    203.46 o 
  -9  11   9      354.87      207.72    160.88 o 
  -8  11   9     1768.74     1587.14    248.22 o 
  -7  11   9      567.36      266.83    156.67 o 
  -6  11   9     1724.75     1732.50    181.34 o 
  -5  11   9      446.08      417.07    112.20 o 
  -4  11   9     3853.47     3962.36    168.57 o 
  -3  11   9      175.86      209.23    111.28 o 
  -2  11   9     4735.89     4821.34    196.47 o 
  -1  11   9       18.10      -11.66    129.26 o 
   0  11   9     4002.21     4416.28    270.48 o 
   1  11   9     1365.57     1505.86    172.44 o 
   2  11   9     4108.90     4638.12    218.65 o 
   3  11   9       14.59     -138.10    140.58 o 
   4  11   9     3348.80     3631.52    346.29 o 
   5  11   9      777.60      308.25    169.24 o 
   6  11   9     5328.89     5818.90    316.69 o 
   7  11   9       66.94      111.31    134.98 o 
   8  11   9     1301.86     1823.75    201.99 o 
   9  11   9      342.20      114.81    244.88 o 
  10  11   9     1789.38     1757.16    204.69 o 
  11  11   9      423.90       56.91    200.74 o 
 -15  12   9     5354.34     4945.40    349.19 o 
 -14  12   9     2123.26     1643.03    266.01 o 
 -13  12   9     5494.68     6059.47    580.35 o 
 -12  12   9     3042.89     2866.24    274.46 o 
 -11  12   9     4154.51     4427.42    297.42 o 
 -10  12   9     3078.26     2775.32    263.47 o 
  -9  12   9     3842.99     3842.22    270.22 o 
  -8  12   9     2528.37     2228.98    230.20 o 
  -7  12   9     4997.95     5483.27    286.73 o 
  -6  12   9      656.75      698.59    181.04 o 
  -5  12   9     5760.38     5690.85    257.66 o 
  -4  12   9     1628.82     1700.89    182.33 o 
  -3  12   9     4306.62     4503.23    226.07 o 
  -2  12   9     4693.52     4277.31    240.98 o 
  -1  12   9     6102.98     6035.88    233.95 o 
   0  12   9     3237.52     2955.72    211.27 o 
   1  12   9     9282.31     8917.42    307.68 o 
   2  12   9     3688.64     3886.31    387.21 o 
   3  12   9     3725.95     3498.12    226.50 o 
   4  12   9     3910.96     3525.72    231.62 o 
   5  12   9     9033.91     9322.53    323.91 o 
   6  12   9     5252.62     4643.04    267.13 o 
   7  12   9     4540.23     5084.19    268.62 o 
   8  12   9     5588.66     4875.77    237.32 o 
   9  12   9     4651.56     5541.64    339.09 o 
  10  12   9     2871.79     1874.05    409.46 o 
 -13  13   9      119.94     -402.83    423.65 o 
 -12  13   9       79.34     -175.04    222.46 o 
 -11  13   9      285.08     -148.66    213.07 o 
 -10  13   9      166.77      -13.41    204.82 o 
  -9  13   9     1778.12     1797.78    297.10 o 
  -8  13   9       72.01     -103.24    197.60 o 
  -7  13   9     1347.70     1127.16    201.71 o 
  -6  13   9        3.69       62.59    183.95 o 
  -5  13   9     3851.30     3530.18    361.96 o 
  -4  13   9       10.16     -159.74    159.74 o 
  -3  13   9     1031.38     1035.19    186.72 o 
  -2  13   9       27.57     -142.13    228.37 o 
  -1  13   9     1885.31     2157.58    423.30 o 
   0  13   9        2.62     -185.92    284.77 o 
   1  13   9     2093.26     2639.42    324.36 o 
   2  13   9       18.77     -164.99    164.99 o 
   3  13   9     1518.20     1455.42    208.78 o 
   4  13   9        6.98        6.41    196.94 o 
   5  13   9      670.52      825.33    286.05 o 
   6  13   9      129.15       74.27    190.94 o 
   7  13   9      786.82     1046.59    227.45 o 
  -9  14   9     4603.14     4904.52    333.18 o 
  -8  14   9     3142.31     4049.96    279.31 o 
  -7  14   9     3264.77     3215.34    259.15 o 
  -6  14   9     7528.19     8331.98    329.35 o 
  -5  14   9     2453.56     2643.86    254.26 o 
  -4  14   9     3261.43     2997.74    252.53 o 
  -3  14   9     3608.77     3459.12    263.21 o 
  -2  14   9     3686.80     3792.05    305.45 o 
  -1  14   9     2660.61     2439.80    354.52 o 
   0  14   9     4149.89     4425.93    359.65 o 
   1  14   9     3489.98     2638.10    320.84 o 
   2  14   9     3390.07     3152.87    385.01 o 
   3  14   9     3621.55     3793.59    404.76 o 
   4  14   9     2305.48     1685.70    364.88 o 
 -24   0  10       71.34      333.83    389.06 o 
 -22   0  10     3695.31     3395.94    387.61 o 
 -20   0  10      332.25      -32.18    313.13 o 
 -18   0  10       78.36     -193.26    229.80 o 
 -16   0  10      141.85      -44.74    155.35 o 
 -14   0  10     1874.35     1686.14    149.38 o 
 -12   0  10     3135.81     3445.56    157.83 o 
 -10   0  10     4921.66     5351.02    170.88 o 
  -8   0  10    39523.32    42149.29    524.97 o 
  -6   0  10      114.23      341.22     91.31 o 
  -4   0  10    13141.41    12847.32    235.23 o 
  -2   0  10     3388.78     3276.42    151.77 o 
   0   0  10    48295.93    48815.09    681.01 o 
   2   0  10     5427.35     7767.85    184.71 o 
   4   0  10      630.89      430.33     99.72 o 
   6   0  10      159.63      468.45    135.64 o 
   8   0  10      455.90      519.35    144.61 o 
  10   0  10    10235.99    10624.50    316.18 o 
  12   0  10      418.39      782.27    176.54 o 
  14   0  10     2012.57     2199.83    226.62 o 
  16   0  10     1677.62     2174.49    243.36 o 
  18   0  10      207.82      423.92    320.20 o 
 -24   1  10     6941.44     6585.19    472.40 o 
 -23   1  10     4998.00     4899.64    343.81 o 
 -22   1  10    13416.40    13674.30    453.29 o 
 -21   1  10     5247.78     5610.48    333.20 o 
 -20   1  10     6781.28     6547.71    337.89 o 
 -19   1  10     4706.10     4379.81    259.74 o 
 -18   1  10     4802.42     5244.43    264.30 o 
 -17   1  10    16149.79    16438.38    355.44 o 
 -16   1  10    13103.96    13148.49    288.83 o 
 -15   1  10     8642.59     8735.13    278.86 o 
 -14   1  10     9717.06     9241.54    184.88 o 
 -13   1  10    19820.27    18897.19    244.56 o 
 -12   1  10    22014.77    22208.16    252.02 o 
 -11   1  10    11098.50    11060.43    164.92 o 
 -10   1  10    11779.49    11087.42    160.92 o 
  -9   1  10    13966.06    13228.42    194.39 o 
  -8   1  10    11613.89    11225.54    163.43 o 
  -7   1  10    38289.93    38947.34    372.15 o 
  -6   1  10    50772.39    53475.97    455.36 o 
  -5   1  10    38533.55    36064.34    336.49 o 
  -4   1  10    13723.44    12918.54    223.97 o 
  -3   1  10     4241.95     4184.25     95.86 o 
  -2   1  10    35306.54    36858.16    333.78 o 
  -1   1  10    35080.06    35225.25    325.10 o 
   0   1  10    42444.57    42943.47    357.09 o 
   1   1  10     4540.13     4916.15    108.88 o 
   2   1  10    14049.81    13755.92    160.63 o 
   3   1  10    10866.47    10452.47    166.16 o 
   4   1  10    60330.20    61118.01    544.78 o 
   5   1  10    37435.66    38546.56    423.79 o 
   6   1  10    33303.41    32802.32    379.77 o 
   7   1  10    11791.57    12173.88    209.60 o 
   8   1  10    20452.10    20394.92    291.62 o 
   9   1  10     7451.08     7895.38    194.19 o 
  10   1  10    13339.77    12684.53    239.79 o 
  11   1  10     4091.16     4313.82    220.26 o 
  12   1  10     7373.34     7420.94    215.45 o 
  13   1  10     4169.58     4211.19    183.98 o 
  14   1  10     8191.18     8189.90    239.05 o 
  15   1  10     3560.58     3900.36    205.72 o 
  16   1  10     6668.95     6358.30    262.31 o 
  17   1  10     5624.86     4925.81    272.97 o 
  18   1  10     1160.93     1178.50    235.41 o 
 -24   2  10      134.27      -95.17    230.27 o 
 -23   2  10     1063.87      525.68    237.55 o 
 -22   2  10      106.77       21.38    220.77 o 
 -21   2  10     1628.89     1484.18    216.31 o 
 -20   2  10        5.71      -54.56    173.93 o 
 -19   2  10      220.47      201.63    165.40 o 
 -18   2  10        6.63     -136.16    136.16 o 
 -17   2  10     1970.57     1937.51    166.93 o 
 -16   2  10      479.60       96.40    126.73 o 
 -15   2  10      203.37      119.36    117.50 o 
 -14   2  10     2790.39     3121.74    151.19 o 
 -13   2  10       37.51       94.88     92.40 o 
 -12   2  10     1276.16     1398.60     95.00 o 
 -11   2  10     1978.77     2023.49     95.63 o 
 -10   2  10     1141.57     1073.72     81.13 o 
  -9   2  10     3445.91     3724.30    117.18 o 
  -8   2  10     1930.13     2362.96     94.70 o 
  -7   2  10    17868.94    18823.87    297.68 o 
  -6   2  10     4862.38     5148.92    114.50 o 
  -5   2  10    18546.08    18298.35    196.51 o 
  -4   2  10      697.74      916.55     65.30 o 
  -3   2  10     8529.32     8665.88    120.49 o 
  -2   2  10     4817.01     4952.89    115.14 o 
  -1   2  10    11263.63    11671.10    160.87 o 
   0   2  10     1619.55     1736.83     67.60 o 
   1   2  10    11445.78    11106.15    136.63 o 
   2   2  10     1974.48     1972.72     73.08 o 
   3   2  10     1185.54      673.38     62.77 o 
   4   2  10      510.87      640.35     75.70 o 
   5   2  10     5005.86     4424.41    107.72 o 
   6   2  10      574.81      726.03     85.17 o 
   7   2  10      342.60      349.62     90.13 o 
   8   2  10     2242.76     2431.11    128.12 o 
   9   2  10     5883.22     6437.02    185.78 o 
  10   2  10     1141.72     1142.31    125.20 o 
  11   2  10     5935.51     6358.32    198.42 o 
  12   2  10     1006.86      973.99    134.38 o 
  13   2  10      215.04      141.68    133.61 o 
  14   2  10      396.61      269.17    148.85 o 
  15   2  10     2261.31     2676.46    199.71 o 
  16   2  10       35.03      -20.02    162.08 o 
  17   2  10      218.92      267.44    176.02 o 
  18   2  10       92.68      280.89    271.99 o 
 -24   3  10     1820.97     1984.07    408.26 o 
 -23   3  10     4933.79     4529.91    304.06 o 
 -22   3  10     4136.52     4370.78    315.80 o 
 -21   3  10    11048.42    11569.46    376.01 o 
 -20   3  10     1766.23     1610.24    191.11 o 
 -19   3  10    12800.62    12647.81    339.28 o 
 -18   3  10    11325.54    11214.46    289.41 o 
 -17   3  10    16559.46    16627.66    319.47 o 
 -16   3  10     6766.01     7336.78    225.72 o 
 -15   3  10    14718.21    14070.42    278.31 o 
 -14   3  10    14640.89    14732.20    276.15 o 
 -13   3  10     3520.20     3527.39    233.95 o 
 -12   3  10    14941.24    14245.43    236.48 o 
 -11   3  10    36500.33    35532.25    430.42 o 
 -10   3  10    28760.65    27636.08    300.94 o 
  -9   3  10    26467.58    26309.48    284.01 o 
  -8   3  10    26517.74    25249.25    271.10 o 
  -7   3  10    67238.17    68385.39    616.72 o 
  -6   3  10    18627.58    16882.45    189.49 o 
  -5   3  10    16918.05    17457.09    188.56 o 
  -4   3  10     4585.07     3976.01    103.00 o 
  -3   3  10    13981.66    13892.27    169.05 o 
  -2   3  10    14806.10    13590.19    151.98 o 
  -1   3  10    24270.62    24492.78    227.62 o 
   0   3  10    16375.22    16263.32    188.20 o 
   1   3  10    58839.48    60720.37    509.22 o 
   2   3  10     5371.15     5420.16    145.96 o 
   3   3  10    25952.38    25321.51    259.38 o 
   4   3  10    23597.30    24492.06    318.69 o 
   5   3  10    27914.05    27506.77    278.30 o 
   6   3  10     6108.61     6235.40    124.41 o 
   7   3  10    22172.94    21607.87    259.86 o 
   8   3  10     5901.21     6132.71    159.67 o 
   9   3  10    17044.25    16842.37    286.77 o 
  10   3  10     5383.71     5691.16    193.72 o 
  11   3  10    23959.00    22845.06    358.38 o 
  12   3  10     5527.23     5955.52    212.14 o 
  13   3  10     7496.54     7388.03    252.20 o 
  14   3  10     3379.45     3589.83    241.43 o 
  15   3  10     6856.15     6832.72    335.56 o 
  16   3  10     6139.79     6785.18    340.41 o 
  17   3  10     4268.59     3427.77    242.55 o 
  18   3  10     4274.81     4135.34    264.09 o 
 -23   4  10      813.72      909.19    246.43 o 
 -22   4  10     1020.83      963.68    262.66 o 
 -21   4  10        1.21     -118.85    195.62 o 
 -20   4  10     1483.70     1353.16    215.76 o 
 -19   4  10        2.48     -159.92    159.92 o 
 -18   4  10     1785.39     1756.73    170.69 o 
 -17   4  10      121.57     -124.99    124.99 o 
 -16   4  10     3486.95     3470.91    181.00 o 
 -15   4  10     1842.10     2036.29    151.07 o 
 -14   4  10     2760.15     3264.11    163.88 o 
 -13   4  10      116.85       77.15    103.75 o 
 -12   4  10      449.63      641.78    110.13 o 
 -11   4  10        7.05      -63.75     86.29 o 
 -10   4  10     2371.76     2322.94    119.26 o 
  -9   4  10        3.34        0.28     64.87 o 
  -8   4  10      374.56      455.41     62.19 o 
  -7   4  10     3486.75     3482.62    107.34 o 
  -6   4  10     8172.27     8064.34    114.82 o 
  -5   4  10      311.22      506.27     64.31 o 
  -4   4  10      175.86       10.45     55.84 o 
  -3   4  10      150.22      185.03     52.90 o 
  -2   4  10      523.22      519.05     55.81 o 
  -1   4  10     4914.80     5188.54     94.04 o 
   0   4  10       81.84       41.37     55.26 o 
   1   4  10      910.39     1221.35     68.38 o 
   2   4  10     4195.32     3670.81    143.96 o 
   3   4  10     2552.36     2284.74     86.67 o 
   4   4  10      845.32      681.00     77.50 o 
   5   4  10      334.52      432.36     82.01 o 
   6   4  10     1099.29      940.37     95.69 o 
   7   4  10     1398.05     1330.26    113.45 o 
   8   4  10       89.23       -3.94    103.66 o 
   9   4  10     1489.33     1513.83    138.46 o 
  10   4  10    12490.42    12172.29    276.83 o 
  11   4  10       56.42      157.42    116.25 o 
  12   4  10     3231.13     3658.42    180.93 o 
  13   4  10       82.76        8.77    132.53 o 
  14   4  10     2569.48     3659.90    196.98 o 
  15   4  10       53.64      271.65    152.80 o 
  16   4  10     2474.44     2998.23    214.87 o 
  17   4  10      230.75      262.10    177.87 o 
 -23   5  10     1951.42     1713.47    252.21 o 
 -22   5  10     3737.28     3739.43    284.94 o 
 -21   5  10     3121.45     3548.96    285.17 o 
 -20   5  10    10123.11    10101.45    334.52 o 
 -19   5  10     3874.64     4195.63    244.41 o 
 -18   5  10    10889.32    10687.55    297.56 o 
 -17   5  10     2425.00     2536.72    185.59 o 
 -16   5  10    14465.21    14249.70    310.48 o 
 -15   5  10     1405.51     1566.00    160.55 o 
 -14   5  10     9765.53     9530.63    247.20 o 
 -13   5  10    10591.50    10410.15    246.31 o 
 -12   5  10    19072.32    18970.45    322.44 o 
 -11   5  10     9810.41     9438.22    217.86 o 
 -10   5  10    24558.92    24043.14    363.15 o 
  -9   5  10     7780.37     7592.35    182.58 o 
  -8   5  10    34566.86    34011.94    392.89 o 
  -7   5  10    23871.05    22676.76    262.51 o 
  -6   5  10    25404.05    26160.28    372.04 o 
  -5   5  10     8437.51     7376.19    140.92 o 
  -4   5  10    28434.75    28626.54    319.00 o 
  -3   5  10    18774.35    17578.54    294.89 o 
  -2   5  10    29793.84    29668.29    291.28 o 
  -1   5  10    10238.20     9024.78    175.74 o 
   0   5  10    28385.05    28706.05    287.04 o 
   1   5  10      161.66      181.33     55.04 o 
   2   5  10    27886.48    27898.72    278.93 o 
   3   5  10     1144.54     1180.57     77.90 o 
   4   5  10    11069.84    10992.08    181.42 o 
   5   5  10     9994.61    10164.43    189.03 o 
   6   5  10    15111.05    14927.14    239.53 o 
   7   5  10     4333.46     4620.97    165.70 o 
   8   5  10     5292.96     5348.80    182.86 o 
   9   5  10     5108.43     5943.94    198.50 o 
  10   5  10    17512.89    17393.97    332.90 o 
  11   5  10     5836.25     7015.09    289.55 o 
  12   5  10    15291.76    13646.80    366.31 o 
  13   5  10     1229.70     1464.99    241.41 o 
  14   5  10     7096.71     7370.30    326.58 o 
  15   5  10     6152.75     7780.93    379.22 o 
  16   5  10     6783.58     6457.89    363.50 o 
  17   5  10      910.39     1039.96    294.31 o 
 -22   6  10      269.13      -42.09    201.20 o 
 -21   6  10      300.45       14.74    185.71 o 
 -20   6  10      157.44       49.88    171.47 o 
 -19   6  10     1619.29     1239.24    190.44 o 
 -18   6  10      435.69      199.95    156.81 o 
 -17   6  10     2407.37     2244.17    183.02 o 
 -16   6  10      157.26      145.96    139.97 o 
 -15   6  10     5392.34     5930.33    223.77 o 
 -14   6  10      149.19      132.46    124.03 o 
 -13   6  10     1770.89     1805.14    150.81 o 
 -12   6  10     4605.95     5301.50    194.11 o 
 -11   6  10       84.75      131.72    107.25 o 
 -10   6  10     1128.11     1249.13    115.77 o 
  -9   6  10     1500.20     1265.30     93.30 o 
  -8   6  10     1143.65     1679.79    137.31 o 
  -7   6  10      558.76      398.10    104.02 o 
  -6   6  10        4.93      -21.41     82.39 o 
  -5   6  10     3023.61     3556.54    130.55 o 
  -4   6  10      777.43      963.21    127.87 o 
  -3   6  10      164.11      100.54     63.36 o 
  -2   6  10     2647.39     3021.29    163.07 o 
  -1   6  10       68.26       51.68     77.02 o 
   0   6  10      656.74      644.95    102.11 o 
   1   6  10     1640.54     1679.55    105.33 o 
   2   6  10       74.77       83.55     67.30 o 
   3   6  10     5055.10     5176.51    132.17 o 
   4   6  10      522.77      399.88     87.77 o 
   5   6  10     1040.16      957.02    112.54 o 
   6   6  10      482.31      339.77    104.35 o 
   7   6  10     1962.59     2077.37    141.32 o 
   8   6  10     3157.11     3196.87    181.07 o 
   9   6  10     1439.36     1790.91    217.02 o 
  10   6  10     1111.73      876.96    163.15 o 
  11   6  10     4604.74     5768.61    285.73 o 
  12   6  10      205.00      112.15    164.69 o 
  13   6  10      957.81     1427.25    210.92 o 
  14   6  10      681.98      530.50    225.51 o 
  15   6  10     1336.02     1903.86    288.53 o 
  16   6  10      151.61      225.16    229.88 o 
 -22   7  10     1080.45     1508.40    413.72 o 
 -21   7  10     6494.44     6182.27    289.35 o 
 -20   7  10     1239.93     1145.46    199.53 o 
 -19   7  10     9405.15     9492.97    299.91 o 
 -18   7  10      607.27      540.16    162.83 o 
 -17   7  10     9863.47     9415.61    277.10 o 
 -16   7  10     1988.17     2144.85    175.23 o 
 -15   7  10    17656.62    17596.91    339.76 o 
 -14   7  10      410.23      281.82    133.81 o 
 -13   7  10    38413.00    38614.24    554.05 o 
 -12   7  10     3341.53     3599.26    170.65 o 
 -11   7  10    22330.78    22097.27    344.98 o 
 -10   7  10     1058.03      862.41    109.15 o 
  -9   7  10    28002.51    26802.99    417.39 o 
  -8   7  10     4440.90     4390.56    179.33 o 
  -7   7  10    16279.38    15946.30    289.70 o 
  -6   7  10     2437.40     2212.29    136.57 o 
  -5   7  10    33461.02    33332.67    423.39 o 
  -4   7  10      739.41      476.05     91.20 o 
  -3   7  10    25500.64    25151.99    299.88 o 
  -2   7  10     7814.11     6600.73    164.03 o 
  -1   7  10    21391.15    20958.27    298.42 o 
   0   7  10     5392.38     5370.90    164.40 o 
   1   7  10     5291.47     5870.92    177.27 o 
   2   7  10     2978.31     3024.07    149.48 o 
   3   7  10    23648.78    23184.32    351.88 o 
   4   7  10     1787.83     1693.55    151.14 o 
   5   7  10    29851.02    29831.20    414.08 o 
   6   7  10     4753.33     5596.62    218.51 o 
   7   7  10    13510.39    13605.09    291.62 o 
   8   7  10     2653.20     3308.44    194.02 o 
   9   7  10     8087.06     7813.89    255.79 o 
  10   7  10     8593.64     9664.07    281.77 o 
  11   7  10     8176.56     7887.22    314.00 o 
  12   7  10       54.52      -59.42    157.23 o 
  13   7  10     8860.86     8744.45    330.67 o 
  14   7  10     1213.15     1782.90    226.46 o 
  15   7  10     9654.02    10232.12    389.08 o 
  16   7  10      312.07      669.78    228.34 o 
 -21   8  10      923.25      397.68    195.24 o 
 -20   8  10       23.80     -164.76    174.57 o 
 -19   8  10      848.81      359.06    200.98 o 
 -18   8  10      612.07      263.90    158.37 o 
 -17   8  10      461.90      270.67    147.87 o 
 -16   8  10     1661.28     1508.10    162.55 o 
 -15   8  10      406.11      118.20    136.66 o 
 -14   8  10     1840.07     1742.94    156.30 o 
 -13   8  10      158.39      257.31    121.21 o 
 -12   8  10       58.40     -128.92    128.92 o 
 -11   8  10       85.38     -125.05    125.05 o 
 -10   8  10     2086.12     1954.86    160.88 o 
  -9   8  10      729.61      671.47    133.62 o 
  -8   8  10     4284.35     4623.36    201.01 o 
  -7   8  10      642.92      611.86    124.04 o 
  -6   8  10     2326.22     2488.17    149.71 o 
  -5   8  10      263.25      218.54    108.44 o 
  -4   8  10     2321.74     2401.93    138.75 o 
  -3   8  10      441.23      547.41     93.64 o 
  -2   8  10     2293.69     2678.86    136.85 o 
  -1   8  10      135.63       -3.42     99.17 o 
   0   8  10      669.43      539.76    108.11 o 
   1   8  10       34.70       95.83    105.39 o 
   2   8  10     2302.19     2776.16    156.53 o 
   3   8  10      898.43      746.94    127.57 o 
   4   8  10     5145.86     5834.61    258.81 o 
   5   8  10     1199.46     1170.05    127.69 o 
   6   8  10     1469.96     1816.14    150.94 o 
   7   8  10      128.08      -18.38    123.69 o 
   8   8  10     1976.04     2971.22    227.81 o 
   9   8  10     3407.55     3908.13    224.29 o 
  10   8  10     2759.22     3180.99    224.39 o 
  11   8  10      103.67     -155.54    155.54 o 
  12   8  10     2347.80     2588.07    248.05 o 
  13   8  10      373.75      427.00    251.05 o 
  14   8  10     1321.67     1402.85    223.19 o 
  15   8  10       88.54     -187.86    199.91 o 
 -20   9  10     6351.36     6106.45    336.45 o 
 -19   9  10     1580.28     1418.22    184.27 o 
 -18   9  10     9789.40    10242.40    296.82 o 
 -17   9  10      780.08      519.72    156.86 o 
 -16   9  10     7357.62     7801.23    250.49 o 
 -15   9  10       59.98      -22.20    130.19 o 
 -14   9  10    18997.71    17948.15    327.42 o 
 -13   9  10      633.56      661.54    124.60 o 
 -12   9  10    11853.54    11428.63    285.17 o 
 -11   9  10     2216.55     2117.81    232.42 o 
 -10   9  10    12372.13    13001.57    293.21 o 
  -9   9  10     1232.65     1170.59    146.40 o 
  -8   9  10    15811.40    16309.16    316.60 o 
  -7   9  10     1972.81     1854.08    149.88 o 
  -6   9  10    25556.46    25859.88    403.75 o 
  -5   9  10       57.02      -97.99    111.19 o 
  -4   9  10    23089.90    23155.54    348.83 o 
  -3   9  10      135.63      -76.99     94.13 o 
  -2   9  10    22853.56    23100.77    340.67 o 
  -1   9  10     2669.60     2327.25    136.72 o 
   0   9  10    20819.32    20422.84    371.54 o 
   1   9  10     7967.84     7649.92    202.41 o 
   2   9  10    17135.72    17128.28    310.92 o 
   3   9  10     2324.74     2328.44    164.44 o 
   4   9  10    17877.77    17447.93    341.90 o 
   5   9  10     5126.58     5566.74    196.45 o 
   6   9  10    18502.21    18447.12    346.66 o 
   7   9  10     2038.47     2563.76    182.23 o 
   8   9  10     9775.12     9662.11    274.36 o 
   9   9  10     2989.55     4128.70    219.36 o 
  10   9  10     8218.88     8304.24    281.62 o 
  11   9  10      944.99     1656.96    207.14 o 
  12   9  10     9426.31    10307.02    492.51 o 
  13   9  10       81.81      377.87    212.63 o 
  14   9  10     6311.62     6686.19    367.52 o 
 -18  10  10       31.52     -108.81    181.55 o 
 -17  10  10      270.60      339.78    176.30 o 
 -16  10  10     1728.84     1572.20    244.32 o 
 -15  10  10      231.13      283.76    149.34 o 
 -14  10  10      600.19      452.95    206.20 o 
 -13  10  10     1398.25      980.43    152.22 o 
 -12  10  10      379.89      244.61    137.77 o 
 -11  10  10       21.40     -128.76    128.76 o 
 -10  10  10       31.59     -123.91    123.91 o 
  -9  10  10     2371.27     2182.27    165.42 o 
  -8  10  10       71.28     -117.71    117.71 o 
  -7  10  10     2298.91     2146.32    153.90 o 
  -6  10  10      858.33      799.44    131.15 o 
  -5  10  10      439.44      462.24    119.52 o 
  -4  10  10       67.04       -6.87    126.31 o 
  -3  10  10     9626.67     9506.71    219.39 o 
  -2  10  10      475.47      317.71    128.47 o 
  -1  10  10     2556.36     2974.53    169.65 o 
   0  10  10       74.65      -50.31    121.68 o 
   1  10  10      697.34      798.20    123.56 o 
   2  10  10       15.10     -102.44    116.50 o 
   3  10  10      769.16      743.28    159.84 o 
   4  10  10      404.96      337.85    137.87 o 
   5  10  10     2353.35     2977.39    274.85 o 
   6  10  10      351.34       38.42    129.33 o 
   7  10  10      339.52      321.15    155.57 o 
   8  10  10       72.41      426.63    163.05 o 
   9  10  10     3137.82     3648.85    384.52 o 
  10  10  10       54.89     -159.25    176.27 o 
  11  10  10      185.73       49.37    195.95 o 
  12  10  10       26.57       -1.09    210.75 o 
 -17  11  10     6327.64     6580.31    356.12 o 
 -16  11  10       24.68     -210.98    210.98 o 
 -15  11  10    10668.59    11899.48    452.80 o 
 -14  11  10      604.39      596.81    209.35 o 
 -13  11  10     7156.05     7619.59    326.37 o 
 -12  11  10     1344.61      972.57    232.17 o 
 -11  11  10     4712.71     4313.20    257.06 o 
 -10  11  10      819.50      476.72    179.91 o 
  -9  11  10    11249.14    11423.85    329.86 o 
  -8  11  10      682.11      419.04    170.15 o 
  -7  11  10    10344.84    10521.98    254.54 o 
  -6  11  10      537.95      225.84    122.87 o 
  -5  11  10    14315.56    14467.63    280.22 o 
  -4  11  10     1789.48     1601.70    140.62 o 
  -3  11  10    16261.82    16433.69    295.29 o 
  -2  11  10      799.86      526.39    135.26 o 
  -1  11  10    11516.43    11558.88    265.71 o 
   0  11  10       17.11     -131.34    131.34 o 
   1  11  10    11591.60    11080.57    305.84 o 
   2  11  10       11.34      -77.20    139.17 o 
   3  11  10    14655.69    14424.59    330.96 o 
   4  11  10      400.30      163.53    168.33 o 
   5  11  10     9468.56     9930.73    324.57 o 
   6  11  10      354.33      141.93    174.88 o 
   7  11  10    14024.92    13944.16    343.37 o 
   8  11  10      529.79      639.24    172.93 o 
   9  11  10     8785.09     8736.74    341.73 o 
  10  11  10       83.69       36.21    192.16 o 
  11  11  10     6635.67     6113.80    316.67 o 
 -15  12  10      223.25     -162.08    221.57 o 
 -14  12  10       71.64       71.82    225.25 o 
 -13  12  10       19.69     -206.11    206.11 o 
 -12  12  10      906.11      390.68    269.17 o 
 -11  12  10      268.04     -122.53    201.21 o 
 -10  12  10       50.26     -191.75    191.75 o 
  -9  12  10      109.15     -186.73    186.73 o 
  -8  12  10      974.00      845.66    252.52 o 
  -7  12  10     1286.74     1269.95    201.15 o 
  -6  12  10      182.93      349.88    169.70 o 
  -5  12  10      460.50      358.62    165.18 o 
  -4  12  10     1196.01     1092.59    176.63 o 
  -3  12  10      695.46      703.32    127.20 o 
  -2  12  10     3869.38     3960.20    245.19 o 
  -1  12  10     2050.69     2279.59    190.45 o 
   0  12  10     1093.38      939.24    205.37 o 
   1  12  10      140.11     -169.38    169.38 o 
   2  12  10     2233.64     2250.65    217.59 o 
   3  12  10     2338.43     2591.62    288.02 o 
   4  12  10      414.91      173.57    209.45 o 
   5  12  10       83.66     -145.57    175.04 o 
   6  12  10       30.12     -201.58    201.58 o 
   7  12  10       27.38     -148.22    148.22 o 
   8  12  10     1011.07     1011.95    255.04 o 
   9  12  10       73.39     -173.07    184.01 o 
 -12  13  10     8023.29     7839.29    382.71 o 
 -11  13  10       65.41     -215.12    215.12 o 
 -10  13  10     4849.45     4935.23    321.59 o 
  -9  13  10      460.13       61.63    213.93 o 
  -8  13  10     9373.21     9379.93    339.05 o 
  -7  13  10       42.02     -168.21    168.21 o 
  -6  13  10     5881.16     5821.81    278.50 o 
  -5  13  10       73.41     -170.01    170.01 o 
  -4  13  10     8642.17     8905.77    308.87 o 
  -3  13  10       16.95     -162.73    162.73 o 
  -2  13  10    12221.09    12481.92    466.48 o 
  -1  13  10       91.55     -190.22    225.59 o 
   0  13  10     8163.51     7963.04    423.86 o 
   1  13  10      174.99     -120.95    176.95 o 
   2  13  10    11597.12    11978.08    394.73 o 
   3  13  10        5.40     -200.36    200.36 o 
   4  13  10     7895.07     7941.37    403.52 o 
   5  13  10      123.51     -328.93    328.93 o 
   6  13  10     8875.71     9068.61    379.23 o 
  -9  14  10      703.27      548.19    333.75 o 
  -8  14  10      440.85      -59.40    203.04 o 
  -7  14  10      320.17      298.00    203.11 o 
  -6  14  10      773.29     1187.06    289.79 o 
  -5  14  10       48.97       88.81    204.39 o 
  -4  14  10      122.34       20.14    189.17 o 
  -3  14  10       29.72      -24.60    183.38 o 
  -2  14  10       27.38       20.82    265.68 o 
  -1  14  10       34.86     -327.22    448.03 o 
   0  14  10       68.91     -277.28    277.28 o 
   1  14  10       64.83     -188.56    299.16 o 
   2  14  10      469.42     -330.04    779.22 o 
   3  14  10     1792.44     1540.16    721.32 o 
 -23   0  11     9168.30     9441.30    679.38 o 
 -21   0  11    16627.65    16091.75    615.25 o 
 -19   0  11    18702.24    18510.87    626.54 o 
 -17   0  11     2947.64     3205.79    287.70 o 
 -15   0  11    46356.72    45453.50    739.67 o 
 -13   0  11    32907.88    32394.91    472.71 o 
 -11   0  11    33982.47    33778.84    466.45 o 
  -9   0  11    31405.23    29591.69    409.55 o 
  -7   0  11    13083.90    11681.70    219.79 o 
  -5   0  11    74525.17    74238.30    886.71 o 
  -3   0  11    78007.09    80539.33   1042.86 o 
  -1   0  11    42192.95    43129.98    608.49 o 
   1   0  11    38853.59    38333.04    494.49 o 
   3   0  11   124781.81   126339.63   1463.45 o 
   5   0  11    30983.49    30602.51    506.48 o 
   7   0  11    52820.45    53281.12    800.73 o 
   9   0  11    12983.07    12994.21    340.48 o 
  11   0  11    26095.14    24698.84    511.31 o 
  13   0  11     5750.12     5933.29    299.96 o 
  15   0  11    11691.55    11571.47    387.31 o 
  17   0  11     4974.92     4511.72    469.45 o 
 -24   1  11      127.39      177.09    248.62 o 
 -23   1  11      494.95      597.14    232.74 o 
 -22   1  11      114.46      366.12    218.90 o 
 -21   1  11        4.23      279.82    209.97 o 
 -20   1  11      164.57      -92.17    204.60 o 
 -19   1  11       32.38     -130.61    170.58 o 
 -18   1  11       68.09     -154.08    154.08 o 
 -17   1  11       45.45     -144.39    144.39 o 
 -16   1  11      916.72      736.69    139.33 o 
 -15   1  11     3249.28     3347.73    157.91 o 
 -14   1  11      836.76      820.84    102.24 o 
 -13   1  11      485.60      467.96     88.54 o 
 -12   1  11      466.55      416.35     79.43 o 
 -11   1  11      273.46       68.03     67.32 o 
 -10   1  11     4880.92     5346.55    120.22 o 
  -9   1  11     5560.48     5856.54    120.21 o 
  -8   1  11        8.56      -65.48     65.48 o 
  -7   1  11      348.35      436.42     67.95 o 
  -6   1  11     1826.89     1953.62     82.90 o 
  -5   1  11     4031.20     4643.07    112.47 o 
  -4   1  11       12.45       28.64     61.08 o 
  -3   1  11    13399.21    12826.94    172.37 o 
  -2   1  11      365.02      305.23     63.41 o 
  -1   1  11      418.88      237.86     62.13 o 
   0   1  11     5539.93     7208.74    113.91 o 
   1   1  11       40.60       93.60     54.78 o 
   2   1  11     5327.88     5284.74    104.25 o 
   3   1  11      168.44      327.87     63.49 o 
   4   1  11      456.04      797.05     78.39 o 
   5   1  11     2519.64     3219.65    122.20 o 
   6   1  11      129.25       97.79     81.45 o 
   7   1  11     4124.33     4001.40    144.23 o 
   8   1  11     4093.13     4494.19    158.61 o 
   9   1  11      149.57      210.83    103.00 o 
  10   1  11       67.61       72.60    108.71 o 
  11   1  11      783.28      632.66    177.30 o 
  12   1  11      372.14      427.98    126.28 o 
  13   1  11       43.42       72.53    134.69 o 
  14   1  11       11.95     -133.39    133.39 o 
  15   1  11      651.00      935.44    159.22 o 
  16   1  11       36.99       97.63    172.86 o 
  17   1  11     1682.94     1826.09    218.79 o 
  18   1  11        9.48     -224.01    242.95 o 
 -24   2  11     7738.21     7728.46    406.50 o 
 -23   2  11      364.24      462.80    232.46 o 
 -22   2  11     9573.70     9648.67    417.75 o 
 -21   2  11     1677.82     1605.82    218.57 o 
 -20   2  11    15989.01    16309.18    418.77 o 
 -19   2  11       10.32     -151.16    151.16 o 
 -18   2  11    13019.20    12056.83    318.64 o 
 -17   2  11      209.01      297.74    147.33 o 
 -16   2  11    20341.64    19945.07    340.74 o 
 -15   2  11     2537.45     2631.85    178.93 o 
 -14   2  11    37501.01    36847.44    448.10 o 
 -13   2  11      727.65      492.93     99.73 o 
 -12   2  11    19972.81    19724.87    255.53 o 
 -11   2  11       13.55      -68.46     68.46 o 
 -10   2  11    47382.55    46360.84    429.75 o 
  -9   2  11       44.30      -61.61     61.61 o 
  -8   2  11    47818.00    46684.49    437.28 o 
  -7   2  11      498.95      560.43     79.98 o 
  -6   2  11    41819.86    39915.80    448.57 o 
  -5   2  11     5606.68     6489.83    115.88 o 
  -4   2  11    48800.40    46945.68    402.94 o 
  -3   2  11     5407.72     6604.81    116.44 o 
  -2   2  11    23198.63    22369.01    220.83 o 
  -1   2  11     4661.08     4963.03    111.07 o 
   0   2  11    36789.20    35687.29    319.23 o 
   1   2  11      675.88      526.71     57.27 o 
   2   2  11    60254.08    61320.10    496.52 o 
   3   2  11      507.71      263.26     53.24 o 
   4   2  11    25550.77    24753.38    258.56 o 
   5   2  11     7361.21     7152.92    144.09 o 
   6   2  11    35482.09    34499.84    398.45 o 
   7   2  11      929.55     1096.53    103.68 o 
   8   2  11    26377.64    26114.89    346.31 o 
   9   2  11     3903.61     3846.05    158.03 o 
  10   2  11    21202.00    21285.28    323.37 o 
  11   2  11       52.41     -110.23    110.23 o 
  12   2  11    19206.51    18715.14    332.16 o 
  13   2  11      294.60      -53.32    129.20 o 
  14   2  11     7830.43     7941.02    266.01 o 
  15   2  11       35.85     -172.54    172.54 o 
  16   2  11    10586.00    10780.89    335.86 o 
  17   2  11       12.25     -163.08    184.77 o 
 -24   3  11        9.20      131.75    274.28 o 
 -23   3  11      342.23      240.47    295.71 o 
 -22   3  11       13.80     -140.43    184.44 o 
 -21   3  11       87.54      -93.33    180.24 o 
 -20   3  11      121.15     -128.70    162.31 o 
 -19   3  11     2678.33     2855.20    213.33 o 
 -18   3  11      385.56      353.91    155.37 o 
 -17   3  11      742.29      725.14    143.12 o 
 -16   3  11     2125.35     2051.24    157.51 o 
 -15   3  11        9.51       -6.81    111.72 o 
 -14   3  11      111.52      -18.93    106.19 o 
 -13   3  11      957.01      877.11    125.24 o 
 -12   3  11      438.69      417.84    123.94 o 
 -11   3  11       76.11       52.97     83.86 o 
 -10   3  11      375.80      372.63     72.71 o 
  -9   3  11      123.92      129.93     66.44 o 
  -8   3  11       50.12      104.98     63.94 o 
  -7   3  11       60.78       80.90     60.06 o 
  -6   3  11     1152.24     1176.40     70.01 o 
  -5   3  11      169.84      106.69     53.95 o 
  -4   3  11      694.52      638.81     54.85 o 
  -3   3  11      416.71      340.78     58.93 o 
  -2   3  11     1610.54     1583.03     66.56 o 
  -1   3  11      584.54      577.45     57.71 o 
   0   3  11     4435.75     4542.47    100.90 o 
   1   3  11      515.02      608.42     64.17 o 
   2   3  11     7333.13     6597.31    134.78 o 
   3   3  11    11512.63    11369.08    192.13 o 
   4   3  11       30.60      -69.64     69.64 o 
   5   3  11     1074.06      865.13     74.24 o 
   6   3  11     1417.92     1366.67     86.78 o 
   7   3  11     1648.60     1430.25    103.22 o 
   8   3  11      464.27      567.23    107.55 o 
   9   3  11      950.43      949.24    118.35 o 
  10   3  11     1096.36     1145.66    136.19 o 
  11   3  11     1429.83     1763.99    152.01 o 
  12   3  11      141.07      -54.52    128.28 o 
  13   3  11      279.21      296.56    146.66 o 
  14   3  11       64.00        9.72    155.42 o 
  15   3  11       63.00      187.95    168.66 o 
  16   3  11      120.18      235.58    179.26 o 
  17   3  11       17.37      -20.23    182.41 o 
 -23   4  11     9098.82     9600.46    428.16 o 
 -22   4  11      405.89      143.00    240.85 o 
 -21   4  11    15317.13    16622.46    534.15 o 
 -20   4  11      167.28     -120.74    183.09 o 
 -19   4  11     9280.48    10360.65    353.15 o 
 -18   4  11     1879.43     1571.43    180.87 o 
 -17   4  11    23177.03    22594.48    426.80 o 
 -16   4  11     2982.71     3086.25    173.22 o 
 -15   4  11    22979.05    23169.68    424.57 o 
 -14   4  11     1635.77     1480.41    136.88 o 
 -13   4  11    24722.40    24145.90    354.07 o 
 -12   4  11     2231.33     2327.12    134.13 o 
 -11   4  11    35618.20    35397.90    460.74 o 
 -10   4  11     1048.43     1381.87    106.76 o 
  -9   4  11    64120.77    61346.05    609.55 o 
  -8   4  11     3190.38     3901.96    122.46 o 
  -7   4  11    32035.41    31826.97    303.11 o 
  -6   4  11     1024.05     1222.63     63.59 o 
  -5   4  11    52887.06    51409.66    495.35 o 
  -4   4  11     1469.49     1467.93    102.17 o 
  -3   4  11    34138.46    32554.34    311.45 o 
  -2   4  11     5714.85     5913.73    101.04 o 
  -1   4  11    31079.90    29663.58    271.61 o 
   0   4  11    11331.29    11758.13    158.63 o 
   1   4  11    45794.95    45458.14    405.71 o 
   2   4  11     1090.45     1017.99     77.53 o 
   3   4  11    25364.88    25039.74    279.58 o 
   4   4  11     6295.38     5732.88    143.56 o 
   5   4  11    25182.67    25435.33    308.68 o 
   6   4  11      285.27      261.41     95.34 o 
   7   4  11    26645.33    26901.01    372.30 o 
   8   4  11     5159.69     5295.77    245.45 o 
   9   4  11    19886.98    19677.44    347.80 o 
  10   4  11     4025.60     3834.30    196.48 o 
  11   4  11    17956.09    18134.41    351.60 o 
  12   4  11      121.73     -148.96    148.96 o 
  13   4  11    17114.26    16500.25    346.33 o 
  14   4  11       42.30       11.18    175.68 o 
  15   4  11    10206.73    10243.99    331.57 o 
  16   4  11       54.20     -102.06    161.04 o 
  17   4  11    11614.89    12221.01    415.65 o 
 -23   5  11       62.65      -91.02    243.74 o 
 -22   5  11        5.75       40.28    210.62 o 
 -21   5  11      137.59      -16.46    199.68 o 
 -20   5  11      815.15      468.57    199.83 o 
 -19   5  11      104.55       28.49    163.34 o 
 -18   5  11      988.81     1152.80    170.98 o 
 -17   5  11        4.96     -138.37    138.37 o 
 -16   5  11       39.09     -125.81    125.81 o 
 -15   5  11      709.09      624.70    142.69 o 
 -14   5  11     1299.01     1430.98    148.82 o 
 -13   5  11     1157.72      962.75    135.53 o 
 -12   5  11      909.98      831.99    126.87 o 
 -11   5  11     5165.33     6073.76    190.38 o 
 -10   5  11     1435.58     1223.49    133.51 o 
  -9   5  11      106.85      -20.84     77.72 o 
  -8   5  11     1742.42     1655.24    102.86 o 
  -7   5  11       94.24      -79.99     79.99 o 
  -6   5  11     1129.37     1081.72     92.68 o 
  -5   5  11       28.50      -57.43     71.57 o 
  -4   5  11      775.81      883.45     66.91 o 
  -3   5  11      654.57      693.25     84.88 o 
  -2   5  11     1358.68     1623.85     73.13 o 
  -1   5  11      307.91      223.44     54.21 o 
   0   5  11      657.19      449.93     70.71 o 
   1   5  11      317.73       67.30     58.82 o 
   2   5  11     2445.70     2377.90     94.76 o 
   3   5  11      745.46      878.89     86.06 o 
   4   5  11       84.21      103.67     78.59 o 
   5   5  11     3338.37     3641.89    137.57 o 
   6   5  11     1030.21     1087.83    133.85 o 
   7   5  11     1259.36     1588.09    129.44 o 
   8   5  11      691.73      668.11    123.59 o 
   9   5  11     1551.58     1806.38    146.74 o 
  10   5  11      206.96      255.47    147.85 o 
  11   5  11     4499.67     4891.59    239.50 o 
  12   5  11      920.92      984.58    213.90 o 
  13   5  11       11.96      411.38    200.13 o 
  14   5  11     2382.89     2892.83    282.08 o 
  15   5  11     1602.76     1671.68    259.62 o 
  16   5  11      644.90      833.74    248.72 o 
 -22   6  11    10405.95    10491.52    398.46 o 
 -21   6  11       72.56     -186.53    186.53 o 
 -20   6  11     7650.39     9034.25    329.14 o 
 -19   6  11     1030.61      452.98    164.54 o 
 -18   6  11    13098.63    13757.32    331.37 o 
 -17   6  11      965.84      703.56    153.46 o 
 -16   6  11    23133.98    23495.76    410.02 o 
 -15   6  11     1279.37     1003.67    152.23 o 
 -14   6  11    29464.68    29861.68    453.50 o 
 -13   6  11     6003.61     6555.85    216.08 o 
 -12   6  11    43717.94    43859.11    565.69 o 
 -11   6  11     2255.99     2509.64    155.06 o 
 -10   6  11    36856.86    36220.65    470.80 o 
  -9   6  11     4599.56     5115.90    190.38 o 
  -8   6  11    20454.44    18976.39    324.34 o 
  -7   6  11      962.17     1137.08    118.49 o 
  -6   6  11    29031.18    27534.07    366.11 o 
  -5   6  11      111.83      182.32     84.75 o 
  -4   6  11    42029.47    40142.27    447.30 o 
  -3   6  11      207.37      221.15     70.66 o 
  -2   6  11    18321.33    17672.32    220.11 o 
  -1   6  11     9587.60     9967.25    168.03 o 
   0   6  11    16285.18    15768.36    298.45 o 
   1   6  11       65.15       14.80     65.75 o 
   2   6  11     7333.90     7083.08    138.13 o 
   3   6  11     6455.97     6429.43    161.69 o 
   4   6  11    29722.32    29849.07    362.50 o 
   5   6  11     1853.64     1761.67    124.89 o 
   6   6  11    27340.84    28282.75    385.17 o 
   7   6  11     1503.58     1405.93    139.92 o 
   8   6  11    20503.42    20911.33    380.18 o 
   9   6  11     1311.80     1098.69    156.67 o 
  10   6  11    12869.99    13225.93    317.28 o 
  11   6  11      885.39      452.76    171.43 o 
  12   6  11    18029.21    18439.03    689.39 o 
  13   6  11      951.77      422.14    206.41 o 
  14   6  11     8663.86     9916.68    401.99 o 
  15   6  11     2197.17     1673.83    267.83 o 
  16   6  11    10931.42    11673.76    454.26 o 
 -22   7  11      543.88      368.58    278.27 o 
 -21   7  11        0.11     -179.25    179.25 o 
 -20   7  11      746.24      369.08    184.23 o 
 -19   7  11        1.67     -151.70    151.70 o 
 -18   7  11      140.34     -149.83    149.83 o 
 -17   7  11      457.95      106.28    153.63 o 
 -16   7  11      121.76     -134.03    134.03 o 
 -15   7  11      411.07      441.30    141.50 o 
 -14   7  11      245.44       61.15    161.18 o 
 -13   7  11       90.01      -11.63    120.39 o 
 -12   7  11      487.83      146.51    138.14 o 
 -11   7  11       27.64      -51.43     99.48 o 
 -10   7  11     5466.10     5565.80    210.31 o 
  -9   7  11        5.04      122.96    119.72 o 
  -8   7  11     1445.57     1364.38    166.91 o 
  -7   7  11     4282.67     4715.79    178.10 o 
  -6   7  11      248.55       68.45    103.82 o 
  -5   7  11      441.72      438.92     98.03 o 
  -4   7  11       10.59      -85.95     85.95 o 
  -3   7  11     2576.12     2866.50    117.78 o 
  -2   7  11       13.53      -42.44     88.84 o 
  -1   7  11      299.29      367.38     95.65 o 
   0   7  11     2448.42     2441.60    183.67 o 
   1   7  11      957.44     1091.80    118.98 o 
   2   7  11      591.76      603.07    114.56 o 
   3   7  11      371.48      581.43    102.66 o 
   4   7  11     2228.61     2307.01    132.87 o 
   5   7  11        8.64     -105.38    105.38 o 
   6   7  11     6123.18     6394.01    210.04 o 
   7   7  11       44.14        2.27    130.95 o 
   8   7  11      233.86      169.31    142.80 o 
   9   7  11      132.56      214.64    149.50 o 
  10   7  11      352.68      240.80    173.12 o 
  11   7  11      878.38      675.99    207.53 o 
  12   7  11       68.67       57.97    183.16 o 
  13   7  11      672.71      522.16    210.07 o 
  14   7  11      432.50      706.39    236.83 o 
  15   7  11      868.55      653.89    272.28 o 
 -21   8  11     7625.69     8106.59    321.10 o 
 -20   8  11     1486.87      991.67    187.27 o 
 -19   8  11     3480.05     3733.28    224.06 o 
 -18   8  11     2586.16     2100.28    192.50 o 
 -17   8  11     8344.38     8605.90    412.02 o 
 -16   8  11     2272.74     2083.92    174.01 o 
 -15   8  11     8158.07     8452.03    252.08 o 
 -14   8  11     8085.55     8573.57    316.49 o 
 -13   8  11     8132.06     8703.77    271.46 o 
 -12   8  11     5184.23     5511.19    205.36 o 
 -11   8  11    20309.07    20050.44    373.31 o 
 -10   8  11    11656.47    11529.89    311.24 o 
  -9   8  11    10114.94     9592.82    248.81 o 
  -8   8  11     2569.26     2804.35    167.07 o 
  -7   8  11    16678.15    16367.88    364.44 o 
  -6   8  11     6483.71     6879.02    208.12 o 
  -5   8  11    19200.85    18266.46    350.76 o 
  -4   8  11     1019.16     1522.03    137.93 o 
  -3   8  11    15802.95    15148.79    245.85 o 
  -2   8  11     4647.31     5193.66    172.52 o 
  -1   8  11    21995.65    21294.67    317.51 o 
   0   8  11      293.89        9.46    107.79 o 
   1   8  11    17336.45    17538.98    305.43 o 
   2   8  11      850.27      628.21    123.06 o 
   3   8  11    25315.12    25509.41    391.28 o 
   4   8  11     5300.47     5427.17    235.55 o 
   5   8  11    19061.03    19400.91    346.89 o 
   6   8  11     2722.11     3022.18    209.41 o 
   7   8  11    11236.80    11715.17    303.92 o 
   8   8  11     3438.50     3150.17    229.04 o 
   9   8  11     7761.73     8891.43    320.49 o 
  10   8  11     2622.52     2119.82    231.58 o 
  11   8  11     6663.48     7530.73    328.71 o 
  12   8  11     2884.88     2264.20    247.05 o 
  13   8  11     5309.74     6163.76    373.35 o 
  14   8  11     4022.52     3397.64    277.13 o 
 -20   9  11       10.87     -247.54    247.54 o 
 -19   9  11      173.66        2.91    164.22 o 
 -18   9  11        9.45     -149.92    149.92 o 
 -17   9  11      434.79      156.67    167.99 o 
 -16   9  11        0.12     -131.48    131.48 o 
 -15   9  11      827.15      446.39    166.57 o 
 -14   9  11       61.11      143.29    154.46 o 
 -13   9  11       90.77      -96.01    141.26 o 
 -12   9  11      557.22      462.55    149.39 o 
 -11   9  11      377.01       88.81    133.72 o 
 -10   9  11      241.77      264.38    132.70 o 
  -9   9  11      363.47      265.05    134.43 o 
  -8   9  11      976.66     1141.37    143.87 o 
  -7   9  11      549.49      651.17    134.67 o 
  -6   9  11      313.76      247.67    119.67 o 
  -5   9  11     4792.32     4800.06    201.14 o 
  -4   9  11      168.56      459.98    112.65 o 
  -3   9  11     1045.60      906.66    115.05 o 
  -2   9  11     1552.94     1502.75    134.81 o 
  -1   9  11       14.79      -30.32    107.63 o 
   0   9  11      961.34     1341.76    139.93 o 
   1   9  11       80.82     -107.68    107.71 o 
   2   9  11      712.48      862.54    140.77 o 
   3   9  11       10.49     -118.20    118.20 o 
   4   9  11        6.10       16.06    137.26 o 
   5   9  11      585.10      778.05    129.75 o 
   6   9  11       64.61      -57.43    173.64 o 
   7   9  11      266.95      237.86    156.30 o 
   8   9  11      253.63       19.50    179.13 o 
   9   9  11       59.33     -162.83    162.83 o 
  10   9  11        7.40     -106.48    234.59 o 
  11   9  11      429.79      682.54    192.21 o 
  12   9  11        9.13     -109.91    179.98 o 
  13   9  11       11.87      147.07    204.88 o 
 -18  10  11     7032.09     7082.80    290.74 o 
 -17  10  11     3775.08     3240.54    221.53 o 
 -16  10  11     8675.66     8959.94    300.22 o 
 -15  10  11     2880.02     2352.35    196.82 o 
 -14  10  11     4304.61     4439.18    227.99 o 
 -13  10  11     3890.50     3653.70    209.36 o 
 -12  10  11     5945.33     6149.66    237.59 o 
 -11  10  11     4133.42     4202.76    204.64 o 
 -10  10  11     7032.35     7061.02    238.50 o 
  -9  10  11     3913.45     4076.25    258.55 o 
  -8  10  11     8958.28     9280.37    252.63 o 
  -7  10  11     5047.28     5661.65    210.46 o 
  -6  10  11    22683.99    21749.33    373.99 o 
  -5  10  11     4787.39     5271.32    190.91 o 
  -4  10  11    11152.19    10618.48    238.05 o 
  -3  10  11     2742.46     3069.58    201.77 o 
  -2  10  11    31072.26    30329.65    447.68 o 
  -1  10  11     6553.40     6669.35    222.91 o 
   0  10  11     9568.29     9935.13    233.89 o 
   1  10  11     7151.44     6948.21    253.83 o 
   2  10  11    15912.48    16011.05    315.07 o 
   3  10  11     3470.44     3550.11    186.87 o 
   4  10  11    15422.37    15747.80    320.47 o 
   5  10  11     5241.02     5193.45    259.48 o 
   6  10  11     6302.14     6909.51    234.69 o 
   7  10  11     4119.15     3860.95    205.64 o 
   8  10  11     6514.76     7206.96    443.14 o 
   9  10  11     5392.90     5139.08    282.02 o 
  10  10  11     5967.18     6991.78    449.89 o 
  11  10  11     2885.02     2124.39    291.47 o 
  12  10  11     4462.50     5980.41    559.03 o 
 -17  11  11       50.44     -215.75    215.75 o 
 -16  11  11        4.01     -294.32    294.32 o 
 -15  11  11      195.33     -135.05    207.06 o 
 -14  11  11       40.56     -186.38    186.38 o 
 -13  11  11      192.80     -186.80    186.80 o 
 -12  11  11      191.08        5.43    182.22 o 
 -11  11  11        7.71      -78.30    130.04 o 
 -10  11  11      531.37      274.59    136.21 o 
  -9  11  11      721.46      601.21    140.81 o 
  -8  11  11      423.02      318.76    134.01 o 
  -7  11  11      161.24      109.54    133.78 o 
  -6  11  11      642.89      726.20    132.76 o 
  -5  11  11      187.10      219.85    124.29 o 
  -4  11  11      246.11      108.15    120.05 o 
  -3  11  11      762.56      834.10    143.71 o 
  -2  11  11      248.44       -2.04    138.50 o 
  -1  11  11     1675.88     1644.30    160.99 o 
   0  11  11     2679.03     2789.44    201.82 o 
   1  11  11      240.50       25.22    164.80 o 
   2  11  11       52.20     -143.43    143.43 o 
   3  11  11       13.21      -75.08    157.38 o 
   4  11  11     1025.30     1173.66    312.63 o 
   5  11  11      131.63       21.92    190.81 o 
   6  11  11      109.17     -104.87    140.93 o 
   7  11  11      358.95      239.43    151.33 o 
   8  11  11       63.77      -27.41    242.31 o 
   9  11  11      261.74        4.33    183.34 o 
  10  11  11       17.70      -55.08    187.55 o 
 -15  12  11     3318.25     3247.38    287.55 o 
 -14  12  11     2526.58     2129.15    256.25 o 
 -13  12  11     5602.19     5197.92    307.33 o 
 -12  12  11     1751.29     1684.01    232.38 o 
 -11  12  11     4621.64     4639.18    276.35 o 
 -10  12  11     2609.94     2326.38    221.57 o 
  -9  12  11     4613.97     4546.94    259.71 o 
  -8  12  11     4354.72     4716.25    280.47 o 
  -7  12  11     9463.86     9298.50    316.74 o 
  -6  12  11     4047.94     4408.86    304.66 o 
  -5  12  11     7076.49     7225.76    330.41 o 
  -4  12  11     5471.67     5231.56    295.21 o 
  -3  12  11     8375.42     8443.50    241.41 o 
  -2  12  11     4518.42     4568.33    255.42 o 
  -1  12  11     9207.82     9439.14    404.72 o 
   0  12  11     5975.58     6330.60    439.33 o 
   1  12  11     3259.27     3740.08    271.86 o 
   2  12  11     4078.46     4603.95    399.83 o 
   3  12  11     8227.93     8175.34    519.10 o 
   4  12  11     6369.65     6160.41    424.03 o 
   5  12  11     8523.95     9260.11    368.32 o 
   6  12  11     2321.02     1984.10    274.61 o 
   7  12  11     2314.35     2596.46    242.01 o 
   8  12  11     3288.05     2990.66    331.37 o 
 -12  13  11        0.86     -230.12    230.12 o 
 -11  13  11      339.10      100.97    225.56 o 
 -10  13  11       13.59     -219.09    219.09 o 
  -9  13  11        5.49      -98.48    206.47 o 
  -8  13  11      227.59      189.53    196.59 o 
  -7  13  11      461.97      -67.20    186.15 o 
  -6  13  11        3.11     -162.36    178.03 o 
  -5  13  11      522.37      219.09    190.29 o 
  -4  13  11       10.51     -268.29    276.75 o 
  -3  13  11     1312.03     1513.56    216.82 o 
  -2  13  11       25.99     -261.03    262.82 o 
  -1  13  11      382.05      203.22    195.03 o 
   0  13  11       94.58     -107.43    240.00 o 
   1  13  11      309.05      153.63    222.25 o 
   2  13  11      156.52      218.09    246.00 o 
   3  13  11      129.11     -129.45    283.66 o 
   4  13  11      175.86      124.89    245.90 o 
   5  13  11       61.98      362.54    240.98 o 
   6  13  11       23.45     -389.10    389.10 o 
  -8  14  11     3492.58     3903.09    397.86 o 
  -7  14  11     4241.67     3992.05    292.93 o 
  -6  14  11     4411.50     4528.39    339.59 o 
  -5  14  11     7331.17     7331.74    358.38 o 
  -4  14  11     3284.30     3551.58    452.49 o 
  -3  14  11     5791.86     5789.24    308.97 o 
  -2  14  11     2770.51     3000.50    619.72 o 
  -1  14  11     7756.50     8358.84   1739.28 o 
   0  14  11     5170.71     5294.20    546.72 o 
   1  14  11     3532.31     3522.64    507.31 o 
 -24   0  12        2.53      344.57    388.34 o 
 -22   0  12     1153.64      757.11    738.59 o 
 -20   0  12       54.81       45.51    314.43 o 
 -18   0  12      618.46       78.30    198.45 o 
 -16   0  12      712.87      441.03    166.31 o 
 -14   0  12      231.93      240.33    132.83 o 
 -12   0  12     1296.62     1588.74    130.79 o 
 -10   0  12     7375.84     7513.96    192.49 o 
  -8   0  12      209.03      234.00     90.22 o 
  -6   0  12      421.62      -50.22     80.65 o 
  -4   0  12    11771.42    13913.36    296.56 o 
  -2   0  12      163.91      -92.95     92.95 o 
   0   0  12       87.57      241.99     78.82 o 
   2   0  12     2086.75     2628.32    145.04 o 
   4   0  12     1353.01     2078.06    148.68 o 
   6   0  12      601.56      912.76    144.65 o 
   8   0  12       23.64      220.43    146.28 o 
  10   0  12     1701.20     1693.23    195.62 o 
  12   0  12      108.76      194.86    173.88 o 
  14   0  12      222.80     -193.08    193.08 o 
  16   0  12     1884.50     2530.97    332.03 o 
 -24   1  12     3450.64     3107.89    307.15 o 
 -23   1  12     2850.30     2679.42    288.38 o 
 -22   1  12     2707.48     3328.57    292.38 o 
 -21   1  12     5682.93     5543.91    402.60 o 
 -20   1  12    11468.98    11260.92    358.87 o 
 -19   1  12    10515.25    10390.41    338.30 o 
 -18   1  12    14373.74    14735.78    538.19 o 
 -17   1  12    12182.14    11684.79    304.47 o 
 -16   1  12     7536.88     8115.65    244.53 o 
 -15   1  12    13882.09    14145.34    273.86 o 
 -14   1  12     5343.46     5731.71    179.21 o 
 -13   1  12    18123.13    17762.04    238.41 o 
 -12   1  12    12769.88    12357.02    189.76 o 
 -11   1  12    10942.19    10638.29    170.68 o 
 -10   1  12    20487.12    20587.82    231.53 o 
  -9   1  12     5378.84     4913.28    124.95 o 
  -8   1  12    27929.24    27557.88    282.28 o 
  -7   1  12    26118.45    23868.84    249.33 o 
  -6   1  12    25060.15    25108.89    261.22 o 
  -5   1  12    14313.12    13769.70    172.60 o 
  -4   1  12    35754.02    36330.05    359.54 o 
  -3   1  12    27302.16    27307.02    270.87 o 
  -2   1  12    58806.38    59617.29    542.04 o 
  -1   1  12    18413.99    19824.85    239.81 o 
   0   1  12    34615.03    34778.79    309.55 o 
   1   1  12    40071.82    40679.53    365.07 o 
   2   1  12    55028.93    56894.07    608.70 o 
   3   1  12    22690.13    23392.67    264.96 o 
   4   1  12    22153.63    21657.40    277.95 o 
   5   1  12    11415.62    11361.62    197.67 o 
   6   1  12    15977.19    15620.49    248.12 o 
   7   1  12     4038.62     4460.65    155.71 o 
   8   1  12     8099.71     7720.94    195.17 o 
   9   1  12     7174.64     7407.11    198.94 o 
  10   1  12     7076.79     6906.70    200.82 o 
  11   1  12     3867.00     4001.94    176.73 o 
  12   1  12    10053.91     9645.25    240.98 o 
  13   1  12    10264.22    10205.72    262.92 o 
  14   1  12     6812.53     6589.15    252.11 o 
  15   1  12     4096.01     3778.32    230.94 o 
  16   1  12     4276.59     3669.25    264.00 o 
  17   1  12     4936.19     5415.61    366.80 o 
 -24   2  12      197.54      317.43    247.13 o 
 -23   2  12        7.91     -208.41    208.41 o 
 -22   2  12      292.78       67.46    198.39 o 
 -21   2  12      315.55      274.78    189.66 o 
 -20   2  12       80.67      162.98    183.52 o 
 -19   2  12      204.09       -3.20    157.29 o 
 -18   2  12      331.28      209.89    153.37 o 
 -17   2  12      673.20      402.98    146.80 o 
 -16   2  12      248.33      149.07    138.99 o 
 -15   2  12       80.98      -54.50    111.54 o 
 -14   2  12     1794.89     1872.53    131.29 o 
 -13   2  12      702.88      687.60    106.15 o 
 -12   2  12       44.25      -51.66     76.28 o 
 -11   2  12     3084.96     3165.29    115.58 o 
 -10   2  12      109.50      -69.18     69.18 o 
  -9   2  12     1063.01     1098.97     96.84 o 
  -8   2  12    11480.66    12072.00    173.91 o 
  -7   2  12      658.19      693.01     73.00 o 
  -6   2  12        8.22      -60.22     60.22 o 
  -5   2  12       40.09       17.12     57.44 o 
  -4   2  12     8206.69     8289.60    142.58 o 
  -3   2  12      623.89      786.34     62.69 o 
  -2   2  12     3513.73     3842.10     92.88 o 
  -1   2  12      681.50      437.56     59.14 o 
   0   2  12      750.38      675.88     55.82 o 
   1   2  12       67.62      -10.29     51.48 o 
   2   2  12      315.99      283.29     56.40 o 
   3   2  12       67.31      186.87     58.44 o 
   4   2  12     2419.45     2796.41    100.05 o 
   5   2  12     1212.10     1030.75     99.70 o 
   6   2  12     5731.48     6422.45    165.54 o 
   7   2  12        0.95       93.93     91.44 o 
   8   2  12        4.01       30.53    102.56 o 
   9   2  12      223.10      137.24    106.41 o 
  10   2  12       98.80      -26.36    111.90 o 
  11   2  12      316.75      504.13    127.67 o 
  12   2  12       83.16       51.65    135.96 o 
  13   2  12      272.75      173.95    144.81 o 
  14   2  12       25.59     -151.42    172.36 o 
  15   2  12       14.36      -23.48    167.32 o 
  16   2  12      106.89      150.63    187.43 o 
  17   2  12       75.33      103.44    199.60 o 
 -24   3  12     3267.01     3655.29    442.74 o 
 -23   3  12     5931.23     6062.47    352.90 o 
 -22   3  12     3407.86     3757.18    301.78 o 
 -21   3  12     8830.19     8899.83    341.86 o 
 -20   3  12     5877.74     6142.27    272.29 o 
 -19   3  12    17146.88    17060.33    384.98 o 
 -18   3  12     5603.53     6472.05    263.77 o 
 -17   3  12    20913.79    20809.63    382.25 o 
 -16   3  12    13262.68    13077.68    276.20 o 
 -15   3  12    10278.87    10295.23    248.89 o 
 -14   3  12    11629.62    11532.24    246.23 o 
 -13   3  12    13978.53    13606.58    256.23 o 
 -12   3  12    11559.15    11070.12    209.45 o 
 -11   3  12    11374.72    11486.03    191.64 o 
 -10   3  12     3561.83     3254.64    110.38 o 
  -9   3  12    42304.72    42355.43    429.66 o 
  -8   3  12    13777.56    11840.66    163.65 o 
  -7   3  12    43011.67    43414.34    391.95 o 
  -6   3  12    19233.05    18831.61    208.27 o 
  -5   3  12    49100.29    48781.18    438.39 o 
  -4   3  12    10336.23     9792.08    138.89 o 
  -3   3  12    10429.36    10171.96    138.57 o 
  -2   3  12    18653.62    18086.31    211.99 o 
  -1   3  12    43366.04    42256.20    387.23 o 
   0   3  12    10463.35    10744.18    151.11 o 
   1   3  12    33859.90    33658.65    336.72 o 
   2   3  12    15793.80    15600.09    201.48 o 
   3   3  12    40867.02    39834.23    394.84 o 
   4   3  12    17234.52    17845.63    339.93 o 
   5   3  12    10935.53    10249.92    161.38 o 
   6   3  12     2887.61     2954.98    108.36 o 
   7   3  12     8550.21     8154.17    186.50 o 
   8   3  12    21762.93    21976.20    315.27 o 
   9   3  12    10937.59    10117.18    217.56 o 
  10   3  12    11637.55    12091.08    322.93 o 
  11   3  12    14137.22    13220.88    290.46 o 
  12   3  12     6964.21     7580.40    263.37 o 
  13   3  12    11613.13    10448.87    300.92 o 
  14   3  12     8864.58     9444.40    301.46 o 
  15   3  12     4517.39     4551.56    248.33 o 
  16   3  12     4128.09     4455.35    265.87 o 
  17   3  12     8402.38     8297.06    333.70 o 
 -23   4  12       16.31      -50.77    229.04 o 
 -22   4  12      228.57      308.41    222.99 o 
 -21   4  12      272.38       81.55    191.17 o 
 -20   4  12       40.29     -111.70    174.32 o 
 -19   4  12      103.35     -157.49    157.49 o 
 -18   4  12       16.13     -111.58    143.74 o 
 -17   4  12     1092.29      714.70    152.87 o 
 -16   4  12      203.35      -49.61    133.46 o 
 -15   4  12        0.15     -125.02    129.46 o 
 -14   4  12      720.06      687.22    137.16 o 
 -13   4  12     3561.68     4291.41    171.73 o 
 -12   4  12     1642.86     1422.68    122.54 o 
 -11   4  12       46.22       16.71     90.70 o 
 -10   4  12       59.30      -54.76     88.72 o 
  -9   4  12     2893.22     3305.93    112.61 o 
  -8   4  12     3151.13     2970.39     94.36 o 
  -7   4  12       18.95       24.78     55.82 o 
  -6   4  12      272.70      148.67     52.58 o 
  -5   4  12        1.82      -18.07     62.63 o 
  -4   4  12      138.46       74.77     54.75 o 
  -3   4  12        9.05       -2.82     52.80 o 
  -2   4  12     1503.28     1650.00     73.56 o 
  -1   4  12     2511.71     3035.96     85.44 o 
   0   4  12     2853.87     2759.19     91.52 o 
   1   4  12      444.76      422.74     68.69 o 
   2   4  12      123.70      -70.99     70.99 o 
   3   4  12      824.83      792.06     82.33 o 
   4   4  12     1999.66     1877.53    103.66 o 
   5   4  12        0.95       53.55     87.50 o 
   6   4  12       48.12      -96.67     96.67 o 
   7   4  12       30.74      156.90    135.55 o 
   8   4  12       67.64      -32.15    120.96 o 
   9   4  12        2.36     -128.20    128.20 o 
  10   4  12        9.62      197.49    142.81 o 
  11   4  12       60.64       75.25    157.26 o 
  12   4  12     1170.47     1175.64    197.66 o 
  13   4  12       26.41       57.18    193.55 o 
  14   4  12       12.22       14.24    185.07 o 
  15   4  12      582.37       95.51    202.78 o 
  16   4  12      109.39      230.78    212.66 o 
 -23   5  12     1518.18     1281.50    263.71 o 
 -22   5  12    10370.92    10125.03    385.77 o 
 -21   5  12     2113.02     2623.32    265.66 o 
 -20   5  12    10795.22    10853.08    369.71 o 
 -19   5  12    10871.40    11829.75    335.46 o 
 -18   5  12    22105.69    21686.82    548.11 o 
 -17   5  12     2965.48     3239.13    199.48 o 
 -16   5  12    15370.57    15163.83    323.32 o 
 -15   5  12     5553.38     5942.34    226.01 o 
 -14   5  12    21817.65    21352.83    369.63 o 
 -13   5  12    12037.83    12272.57    269.62 o 
 -12   5  12     8685.72     9200.79    228.51 o 
 -11   5  12     3766.62     3725.78    185.94 o 
 -10   5  12    17592.89    18298.40    298.73 o 
  -9   5  12    13864.86    13231.55    238.33 o 
  -8   5  12    15308.44    15639.23    228.27 o 
  -7   5  12     7263.21     6472.24    208.51 o 
  -6   5  12    29297.99    29513.57    362.64 o 
  -5   5  12     7811.18     7078.79    155.63 o 
  -4   5  12    18388.05    17858.80    253.62 o 
  -3   5  12     3432.30     3155.41     96.29 o 
  -2   5  12    31950.52    31575.72    292.51 o 
  -1   5  12    25460.42    24019.87    239.66 o 
   0   5  12    56632.80    56138.82    508.38 o 
   1   5  12      528.84      393.92     76.64 o 
   2   5  12    15583.37    15248.69    215.11 o 
   3   5  12     7794.66     7443.92    156.74 o 
   4   5  12    16771.40    16063.49    234.97 o 
   5   5  12     1506.79     1950.80    131.81 o 
   6   5  12     5942.80     6342.36    185.52 o 
   7   5  12     4826.70     5571.92    190.73 o 
   8   5  12    15300.64    14793.24    297.24 o 
   9   5  12    13964.33    14689.99    327.98 o 
  10   5  12    12684.62    12520.87    344.62 o 
  11   5  12     4293.57     4806.91    259.06 o 
  12   5  12    11114.75    10525.39    347.41 o 
  13   5  12     6875.19     8042.99    358.26 o 
  14   5  12     5307.47     4857.92    319.59 o 
  15   5  12     2322.48     2874.96    301.29 o 
  16   5  12     6151.27     6316.81    409.53 o 
 -22   6  12        1.54        4.84    205.76 o 
 -21   6  12       96.97     -181.08    199.11 o 
 -20   6  12       63.98     -125.82    178.72 o 
 -19   6  12       89.68      103.60    160.24 o 
 -18   6  12        0.34     -143.37    143.37 o 
 -17   6  12      146.56      -25.35    143.62 o 
 -16   6  12      940.19      832.08    151.31 o 
 -15   6  12       12.06     -125.05    125.05 o 
 -14   6  12      143.38      150.26    128.64 o 
 -13   6  12      534.10      443.54    130.04 o 
 -12   6  12      357.01      204.64    141.18 o 
 -11   6  12     1668.86     1726.36    132.24 o 
 -10   6  12        4.91      -50.44     93.67 o 
  -9   6  12      957.15     1015.88    135.38 o 
  -8   6  12      182.78      202.91    111.39 o 
  -7   6  12      755.10      472.39    111.87 o 
  -6   6  12     3243.13     3505.46    140.47 o 
  -5   6  12       82.46      -41.71     86.36 o 
  -4   6  12      317.73      268.84     90.06 o 
  -3   6  12      178.24      107.62     82.15 o 
  -2   6  12        2.76       19.54     64.47 o 
  -1   6  12      689.98      752.69     74.49 o 
   0   6  12       57.25       13.43     68.93 o 
   1   6  12     2161.30     2067.84    136.69 o 
   2   6  12      819.99      653.19     97.33 o 
   3   6  12     3735.94     4037.60    164.26 o 
   4   6  12     4222.18     4867.64    187.05 o 
   5   6  12        4.97      -60.39    100.23 o 
   6   6  12     1666.60     1584.73    151.28 o 
   7   6  12      561.54      614.91    138.06 o 
   8   6  12      544.02      433.67    137.92 o 
   9   6  12       44.90       72.38    154.02 o 
  10   6  12        6.47      190.44    161.73 o 
  11   6  12        2.70      138.74    191.21 o 
  12   6  12       29.51        2.89    192.86 o 
  13   6  12      857.20     1495.29    233.91 o 
  14   6  12      306.98      -26.13    215.14 o 
  15   6  12        8.35     -203.02    225.60 o 
 -22   7  12      207.35     -413.52    413.52 o 
 -21   7  12     8865.32     9683.07    362.68 o 
 -20   7  12      851.86      601.96    180.55 o 
 -19   7  12     9781.89    10038.04    304.85 o 
 -18   7  12     1818.14     1951.94    189.45 o 
 -17   7  12    13007.07    12955.33    311.96 o 
 -16   7  12     3247.32     3181.78    195.01 o 
 -15   7  12    21399.57    20831.81    374.71 o 
 -14   7  12     6378.99     6426.16    222.71 o 
 -13   7  12    19336.10    18818.44    374.45 o 
 -12   7  12     1193.50     1112.82    131.11 o 
 -11   7  12    25167.38    25219.67    375.89 o 
 -10   7  12     4083.89     3764.60    190.00 o 
  -9   7  12    35384.71    35317.98    510.93 o 
  -8   7  12     2385.38     1942.07    151.68 o 
  -7   7  12    16249.39    15971.22    297.87 o 
  -6   7  12     4001.37     3768.56    165.90 o 
  -5   7  12    14384.76    14282.74    249.21 o 
  -4   7  12     2526.43     2388.14    124.74 o 
  -3   7  12    11594.67    11860.89    249.47 o 
  -2   7  12     7665.31     6583.66    154.30 o 
  -1   7  12    15236.82    15514.56    258.18 o 
   0   7  12     3182.22     3238.60    160.81 o 
   1   7  12    18411.19    18365.19    307.54 o 
   2   7  12     2404.48     2292.08    123.12 o 
   3   7  12    12479.66    12000.18    224.28 o 
   4   7  12     2377.30     2480.69    136.80 o 
   5   7  12    23427.55    22674.66    496.46 o 
   6   7  12       79.44      -36.51    127.90 o 
   7   7  12    20493.36    19448.76    430.79 o 
   8   7  12     4265.43     5332.88    265.55 o 
   9   7  12    15903.08    15158.06    399.38 o 
  10   7  12     2102.76     2400.81    228.35 o 
  11   7  12    16747.44    16375.39    442.26 o 
  12   7  12     1741.37     2398.98    245.66 o 
  13   7  12    11685.11    11708.39    466.14 o 
  14   7  12      277.81      458.85    255.74 o 
 -21   8  12       12.08     -254.99    254.99 o 
 -20   8  12      120.05       76.71    172.48 o 
 -19   8  12     1532.24     1397.08    201.79 o 
 -18   8  12     1470.12     1060.16    177.53 o 
 -17   8  12      923.54      835.56    163.01 o 
 -16   8  12        4.17     -136.66    136.66 o 
 -15   8  12       11.12     -106.21    128.49 o 
 -14   8  12      102.26       66.90    180.72 o 
 -13   8  12     1613.48     1402.29    134.54 o 
 -12   8  12      531.69      236.86    147.01 o 
 -11   8  12     1524.21     1519.27    163.42 o 
 -10   8  12       44.84      -27.92    130.07 o 
  -9   8  12      115.53     -123.90    123.90 o 
  -8   8  12       43.39       38.10    123.36 o 
  -7   8  12      310.95      244.18    120.62 o 
  -6   8  12       50.10     -112.05    112.05 o 
  -5   8  12     1853.09     2027.58    143.37 o 
  -4   8  12      668.48      869.98    116.87 o 
  -3   8  12     1653.20     1676.69    118.52 o 
  -2   8  12       25.09       40.43    102.17 o 
  -1   8  12       43.08       50.26    104.46 o 
   0   8  12       74.64     -115.18    115.18 o 
   1   8  12       73.52     -115.37    115.37 o 
   2   8  12       41.11      250.67    122.85 o 
   3   8  12      560.72      525.01    104.95 o 
   4   8  12       63.81       83.06    108.12 o 
   5   8  12     4001.14     4051.25    197.94 o 
   6   8  12        3.93      -55.37    185.66 o 
   7   8  12     3218.75     3894.68    347.00 o 
   8   8  12      100.09      -97.14    155.05 o 
   9   8  12      116.96      -12.85    171.91 o 
  10   8  12        9.32        0.25    179.37 o 
  11   8  12       61.53      101.81    196.66 o 
  12   8  12      630.86      221.45    208.35 o 
  13   8  12      615.57      149.50    216.70 o 
 -19   9  12      210.99      130.17    167.32 o 
 -18   9  12     5576.59     5504.35    240.85 o 
 -17   9  12       80.53     -140.32    140.32 o 
 -16   9  12    15306.66    15344.58    423.77 o 
 -15   9  12      902.55      630.93    139.15 o 
 -14   9  12    12996.75    12823.55    324.40 o 
 -13   9  12      618.98      325.37    152.39 o 
 -12   9  12     9045.62     9644.83    278.67 o 
 -11   9  12     1945.50     1458.09    165.17 o 
 -10   9  12    12071.92    13029.81    355.47 o 
  -9   9  12      599.78      339.40    132.00 o 
  -8   9  12    19035.52    19025.62    351.62 o 
  -7   9  12     2384.65     2534.48    165.59 o 
  -6   9  12    14721.04    15363.08    304.32 o 
  -5   9  12     2259.34     2321.70    235.12 o 
  -4   9  12    38269.96    38036.88    501.27 o 
  -3   9  12     4129.39     3710.32    161.17 o 
  -2   9  12    12102.28    12264.76    248.18 o 
  -1   9  12     3764.79     3652.62    180.11 o 
   0   9  12    35118.12    35680.86    527.30 o 
   1   9  12     5333.09     5667.33    209.23 o 
   2   9  12    16571.96    16705.11    340.78 o 
   3   9  12     2481.95     2538.25    194.84 o 
   4   9  12    14802.27    14621.86    297.86 o 
   5   9  12     2421.58     2958.33    184.62 o 
   6   9  12    18586.58    18361.17    412.41 o 
   7   9  12     1349.97     2003.48    199.50 o 
   8   9  12    10039.30    10016.96    331.66 o 
   9   9  12      285.49      620.51    257.52 o 
  10   9  12    10990.39    11620.96    380.11 o 
  11   9  12      223.33      114.90    255.91 o 
  12   9  12    10971.45    12002.44    391.89 o 
 -18  10  12      159.70      -60.16    179.75 o 
 -17  10  12       74.27       88.80    136.97 o 
 -16  10  12      480.37      151.47    168.09 o 
 -15  10  12      654.75      311.50    166.42 o 
 -14  10  12      312.54     -154.36    154.36 o 
 -13  10  12       29.28     -148.95    148.95 o 
 -12  10  12        0.27     -140.18    140.18 o 
 -11  10  12      539.05      284.57    144.24 o 
 -10  10  12       18.20     -131.11    131.11 o 
  -9  10  12        1.26     -127.84    127.84 o 
  -8  10  12      162.62      121.57    129.09 o 
  -7  10  12       49.73      224.87    135.06 o 
  -6  10  12      197.81      356.20    126.91 o 
  -5  10  12       75.23       64.68    119.14 o 
  -4  10  12      418.03      315.37    120.62 o 
  -3  10  12      334.51      423.19    122.38 o 
  -2  10  12        8.99      120.92    137.84 o 
  -1  10  12        4.17      -27.30    141.68 o 
   0  10  12     1943.37     2168.50    196.12 o 
   1  10  12        9.73       80.57    132.41 o 
   2  10  12       56.67     -108.24    139.63 o 
   3  10  12        7.12     -152.61    152.61 o 
   4  10  12      728.72      478.99    234.82 o 
   5  10  12       28.32      -86.71    128.97 o 
   6  10  12        2.41     -139.36    139.36 o 
   7  10  12      687.11      787.36    167.96 o 
   8  10  12       34.92      -68.46    223.17 o 
   9  10  12      373.72      140.12    183.32 o 
  10  10  12       60.62     -188.41    322.81 o 
  11  10  12      165.86     -180.91    208.06 o 
 -17  11  12     5578.59     5004.44    642.68 o 
 -16  11  12      507.19     -168.06    217.87 o 
 -15  11  12     8325.02     8271.43    359.89 o 
 -14  11  12      258.93      104.17    159.06 o 
 -13  11  12     8023.39     7646.09    352.63 o 
 -12  11  12      347.17     -125.85    150.74 o 
 -11  11  12    12278.32    12084.71    330.92 o 
 -10  11  12      260.24      -27.89    143.03 o 
  -9  11  12    14769.32    14661.55    319.93 o 
  -8  11  12      430.80       85.47    137.22 o 
  -7  11  12     9705.40     9923.67    263.25 o 
  -6  11  12      765.54      418.53    134.47 o 
  -5  11  12    15511.72    15612.16    317.81 o 
  -4  11  12     2284.61     2190.68    202.89 o 
  -3  11  12    19034.12    18762.70    399.43 o 
  -2  11  12     1434.47     1017.25    178.12 o 
  -1  11  12    11180.54    11036.59    336.32 o 
   0  11  12      438.26      282.71    178.05 o 
   1  11  12    20903.55    21491.82    474.88 o 
   2  11  12      143.58      -80.91    174.93 o 
   3  11  12     8932.35     9145.50    395.13 o 
   4  11  12       14.67     -181.37    181.37 o 
   5  11  12    10901.54    11063.64    423.26 o 
   6  11  12      860.19      783.26    165.23 o 
   7  11  12     8083.38     8110.96    306.72 o 
   8  11  12       52.19       34.64    216.61 o 
   9  11  12     4516.55     4920.52    321.24 o 
 -14  12  12      130.62      120.08    247.46 o 
 -13  12  12        1.71     -215.67    215.67 o 
 -12  12  12      255.18      285.71    211.54 o 
 -11  12  12       34.33     -188.55    188.55 o 
 -10  12  12        6.93       68.90    207.96 o 
  -9  12  12     1906.79     1693.29    215.71 o 
  -8  12  12       64.91      144.23    137.00 o 
  -7  12  12        0.53     -132.36    132.36 o 
  -6  12  12       29.15      -11.79    133.20 o 
  -5  12  12      218.47       -3.64    184.77 o 
  -4  12  12       11.97      -63.79    135.50 o 
  -3  12  12        0.56      -62.38    141.60 o 
  -2  12  12        1.27       31.17    178.06 o 
  -1  12  12       59.30      -87.92    209.16 o 
   0  12  12      297.91       99.43    322.82 o 
   1  12  12       71.86     -261.26    337.84 o 
   2  12  12      653.07      328.47    235.32 o 
   3  12  12      306.47     -138.12    261.90 o 
   4  12  12      119.71       62.81    206.13 o 
   5  12  12      143.36     -202.74    202.74 o 
   6  12  12       73.65     -169.82    238.30 o 
   7  12  12      150.58     -265.01    277.87 o 
 -12  13  12     6300.87     7039.67    405.81 o 
 -11  13  12        6.00     -230.62    230.62 o 
 -10  13  12    10235.34    11360.73    448.78 o 
  -9  13  12       50.15     -205.16    205.16 o 
  -8  13  12    10919.48    10990.27    388.64 o 
  -7  13  12       51.38     -135.64    194.45 o 
  -6  13  12    10186.55    10819.71    415.52 o 
  -5  13  12        5.04     -178.39    178.39 o 
  -4  13  12    10064.33    10059.02    345.72 o 
  -3  13  12      139.96     -182.11    186.52 o 
  -2  13  12     7055.71     7592.13    543.82 o 
  -1  13  12      234.12       98.47    215.98 o 
   0  13  12     9958.94     9768.28    416.97 o 
   1  13  12       79.62     -227.99    227.99 o 
   2  13  12     9965.56     9790.03    433.48 o 
   3  13  12       16.42      -49.95    252.90 o 
   4  13  12     7171.99     8559.33    444.33 o 
   5  13  12       45.04     -309.33    458.26 o 
  -7  14  12      118.70      131.69    218.77 o 
  -6  14  12       80.60      -61.08    216.99 o 
  -5  14  12       63.53     -247.82    247.82 o 
  -4  14  12      118.00     -201.67    201.67 o 
  -3  14  12      677.40     1055.26    293.86 o 
  -2  14  12      335.14     -357.61    357.61 o 
  -1  14  12      143.08     -165.35    378.33 o 
   0  14  12        5.86     -599.40    599.40 o 
 -23   0  13     6775.64     5872.71    562.08 o 
 -21   0  13     8193.34     9051.14    607.79 o 
 -19   0  13     8862.13     9348.68    456.16 o 
 -17   0  13     8245.78     8310.82    416.61 o 
 -15   0  13    24392.65    23590.65    444.35 o 
 -13   0  13    44157.08    42321.99    622.43 o 
 -11   0  13    50445.83    49627.70    682.18 o 
  -9   0  13    87436.76    86089.77    995.57 o 
  -7   0  13    17742.63    18367.12    330.20 o 
  -5   0  13    48437.12    47042.61    603.71 o 
  -3   0  13    58515.52    58955.16    808.69 o 
  -1   0  13    63551.19    64461.34    798.34 o 
   1   0  13    37626.11    36452.01    576.53 o 
   3   0  13    13325.45    12894.46    284.30 o 
   5   0  13    55325.30    54189.51    811.18 o 
   7   0  13     6307.66     6699.62    255.77 o 
   9   0  13    21424.10    20577.41    447.74 o 
  11   0  13     9860.97     9910.87    373.69 o 
  13   0  13    13979.13    13745.04    478.04 o 
  15   0  13     8237.62     8862.30    405.24 o 
 -24   1  13       58.37      197.12    238.20 o 
 -23   1  13      662.02      596.94    240.47 o 
 -22   1  13      291.79      104.85    222.96 o 
 -21   1  13       75.23       97.91    204.78 o 
 -20   1  13      366.43      -71.16    185.07 o 
 -19   1  13      400.65      299.79    172.42 o 
 -18   1  13     1326.03      975.03    189.99 o 
 -17   1  13      195.81       87.69    131.09 o 
 -16   1  13      425.93      209.92    122.68 o 
 -15   1  13       42.98     -106.50    106.50 o 
 -14   1  13      785.97      608.57    111.55 o 
 -13   1  13     1400.69     1421.21    112.60 o 
 -12   1  13      481.11      336.30     84.43 o 
 -11   1  13       46.65      -28.26     72.30 o 
 -10   1  13     1892.17     1878.95     97.60 o 
  -9   1  13     1605.90     1710.73     87.81 o 
  -8   1  13      571.01      430.39     67.84 o 
  -7   1  13      269.28      206.32     61.29 o 
  -6   1  13     9806.41     9849.99    162.15 o 
  -5   1  13     3453.61     4040.30    108.10 o 
  -4   1  13     2314.30     2127.82     85.55 o 
  -3   1  13     1346.39     1133.18     77.26 o 
  -2   1  13     4071.35     4854.75    112.17 o 
  -1   1  13     4861.93     5932.31    136.73 o 
   0   1  13     2603.22     3521.11     96.56 o 
   1   1  13     2139.03     2755.30     85.90 o 
   2   1  13      189.01      580.39     74.59 o 
   3   1  13        9.37       80.90     75.98 o 
   4   1  13     1013.92      980.63    109.92 o 
   5   1  13     4695.14     5455.38    156.50 o 
   6   1  13       12.34      -86.61     86.61 o 
   7   1  13      128.79      139.01     98.96 o 
   8   1  13       74.72       42.28    109.48 o 
   9   1  13       43.68       19.69    111.40 o 
  10   1  13      703.81      507.55    127.90 o 
  11   1  13      221.84      191.62    133.62 o 
  12   1  13      181.21      -56.56    136.07 o 
  13   1  13      405.31      434.10    148.89 o 
  14   1  13      118.10      228.27    190.86 o 
  15   1  13       18.11      -92.93    164.24 o 
  16   1  13      178.49     -178.51    178.51 o 
 -24   2  13     7094.55     6608.49    568.60 o 
 -23   2  13       72.39     -115.31    198.25 o 
 -22   2  13     9969.45    10450.54    386.36 o 
 -21   2  13      111.59      253.22    283.40 o 
 -20   2  13    18759.37    19176.44    450.93 o 
 -19   2  13      304.03       97.82    171.22 o 
 -18   2  13    15376.66    15411.36    355.38 o 
 -17   2  13     3197.66     3252.07    213.21 o 
 -16   2  13    17157.68    16717.95    328.00 o 
 -15   2  13      566.43      433.94    124.20 o 
 -14   2  13    34998.18    35042.18    435.27 o 
 -13   2  13       24.40      -90.27     90.27 o 
 -12   2  13    24052.54    23729.45    294.52 o 
 -11   2  13     3996.84     4063.55    149.99 o 
 -10   2  13    67823.63    66296.05    630.85 o 
  -9   2  13     1003.30     1108.68     83.19 o 
  -8   2  13    44539.11    43936.69    459.55 o 
  -7   2  13     9949.86     9860.09    185.40 o 
  -6   2  13    44189.57    43395.65    390.20 o 
  -5   2  13       71.64       -5.40     56.51 o 
  -4   2  13    48463.26    47833.79    435.14 o 
  -3   2  13    11405.91    11535.62    156.46 o 
  -2   2  13    29966.17    29594.66    335.71 o 
  -1   2  13     2808.45     2813.62    103.36 o 
   0   2  13    57815.66    57049.19    488.40 o 
   1   2  13      951.34     1037.72     66.58 o 
   2   2  13    20299.45    19719.74    219.68 o 
   3   2  13      161.16       74.52     64.01 o 
   4   2  13    42119.91    41493.34    452.50 o 
   5   2  13        8.48      -82.43     82.43 o 
   6   2  13    27226.38    26504.40    363.46 o 
   7   2  13     2412.27     2116.77    139.77 o 
   8   2  13    16995.74    16906.24    291.53 o 
   9   2  13      410.62       45.98    114.05 o 
  10   2  13    21734.72    20973.28    346.11 o 
  11   2  13       30.92     -119.14    119.14 o 
  12   2  13    17759.91    17386.71    364.45 o 
  13   2  13        9.88     -139.86    139.86 o 
  14   2  13     9424.36    10141.91    333.29 o 
  15   2  13      781.15      502.26    191.69 o 
  16   2  13     9255.04     9596.19    353.14 o 
 -24   3  13      656.33      475.95    249.46 o 
 -23   3  13      259.89       23.42    228.16 o 
 -22   3  13       78.12      122.54    214.72 o 
 -21   3  13      153.61       23.80    201.78 o 
 -20   3  13      141.28      -80.12    158.65 o 
 -19   3  13        8.87      -73.57    161.96 o 
 -18   3  13       92.63      -10.02    154.77 o 
 -17   3  13     1011.53     1003.83    158.42 o 
 -16   3  13      833.96      859.73    141.32 o 
 -15   3  13     1097.54     1163.52    139.42 o 
 -14   3  13      148.70       75.00    115.84 o 
 -13   3  13      169.25       40.24    104.43 o 
 -12   3  13       52.27      143.43     94.34 o 
 -11   3  13     2063.93     2013.36    107.79 o 
 -10   3  13       31.08      -20.19     73.41 o 
  -9   3  13       78.70      -66.86     66.86 o 
  -8   3  13     8512.49     8259.01    209.52 o 
  -7   3  13     3256.71     3343.40    108.85 o 
  -6   3  13     1252.91     1408.78     73.34 o 
  -5   3  13      564.92      613.18     61.48 o 
  -4   3  13       19.00      -50.48     50.48 o 
  -3   3  13     3522.98     3395.86     81.69 o 
  -2   3  13       18.27      -23.68     60.64 o 
  -1   3  13     1579.68     1565.66     80.93 o 
   0   3  13      635.10      830.11     70.83 o 
   1   3  13     5261.14     5470.19    135.07 o 
   2   3  13        8.70      -65.61     65.61 o 
   3   3  13      204.66        2.65     84.10 o 
   4   3  13     1151.88     1156.26    111.67 o 
   5   3  13     3556.77     3477.20    135.86 o 
   6   3  13      986.17      878.34    110.80 o 
   7   3  13     3180.69     3600.09    191.55 o 
   8   3  13       42.61      -63.67    105.99 o 
   9   3  13      209.66      154.20    120.81 o 
  10   3  13      872.36      650.16    140.10 o 
  11   3  13      213.38      159.15    135.37 o 
  12   3  13       59.18      203.51    140.19 o 
  13   3  13      501.33      103.13    164.90 o 
  14   3  13      605.77      315.14    177.02 o 
  15   3  13       72.31     -165.54    175.08 o 
  16   3  13      206.72      118.03    188.55 o 
 -23   4  13    11374.59    12160.05    458.49 o 
 -22   4  13      162.40      -60.86    219.86 o 
 -21   4  13    17440.58    17797.38    454.44 o 
 -20   4  13      270.32      -30.96    184.90 o 
 -19   4  13    18646.41    18446.35    439.07 o 
 -18   4  13      148.89      -46.74    155.42 o 
 -17   4  13    13768.85    13623.82    313.34 o 
 -16   4  13     1028.90      766.84    151.87 o 
 -15   4  13    21551.32    22389.78    386.06 o 
 -14   4  13     1199.85     1006.32    143.13 o 
 -13   4  13    12004.78    12164.45    266.39 o 
 -12   4  13     2716.46     2856.72    158.12 o 
 -11   4  13    22307.48    22715.25    446.82 o 
 -10   4  13     2751.22     3280.82    139.76 o 
  -9   4  13    21001.78    20434.84    273.51 o 
  -8   4  13     3295.21     3731.61    116.15 o 
  -7   4  13    18433.50    17889.89    204.92 o 
  -6   4  13     1195.91     1069.90     64.22 o 
  -5   4  13    37396.01    36498.30    458.24 o 
  -4   4  13      109.62      -47.34     60.28 o 
  -3   4  13    40739.38    39604.34    379.80 o 
  -2   4  13     5837.95     5629.09    165.80 o 
  -1   4  13    39824.55    38213.45    388.92 o 
   0   4  13       39.29      -64.39     64.39 o 
   1   4  13    42431.12    43122.45    418.99 o 
   2   4  13     2532.81     2110.82    130.47 o 
   3   4  13    33494.09    33790.28    377.48 o 
   4   4  13      437.65      394.83    103.46 o 
   5   4  13    24366.57    24258.16    347.67 o 
   6   4  13      419.49      533.50    124.89 o 
   7   4  13    31833.67    32473.92    497.03 o 
   8   4  13      762.05      524.35    144.03 o 
   9   4  13    18386.40    18499.79    374.08 o 
  10   4  13     1454.46      856.70    167.61 o 
  11   4  13    22719.77    22621.20    436.30 o 
  12   4  13      246.22     -140.09    169.30 o 
  13   4  13     6165.94     6606.65    372.71 o 
  14   4  13      445.95       12.29    197.31 o 
  15   4  13    10805.24    10982.76    412.79 o 
  16   4  13       22.43     -239.44    239.44 o 
 -23   5  13        8.67       29.08    228.73 o 
 -22   5  13      407.94      286.33    215.19 o 
 -21   5  13       63.69     -189.14    189.14 o 
 -20   5  13      152.42       84.11    187.40 o 
 -19   5  13      167.46       -8.56    193.06 o 
 -18   5  13      210.72     -146.73    146.73 o 
 -17   5  13     1068.76      938.17    172.94 o 
 -16   5  13      460.97      315.08    143.33 o 
 -15   5  13     1138.25      910.24    148.82 o 
 -14   5  13      259.68      227.53    129.18 o 
 -13   5  13     3453.72     3508.57    175.08 o 
 -12   5  13    12162.53    11986.47    286.31 o 
 -11   5  13     1894.46     1560.85    132.92 o 
 -10   5  13      380.25      198.55    102.55 o 
  -9   5  13     2793.52     2786.38    132.12 o 
  -8   5  13       20.51      157.92     98.99 o 
  -7   5  13     4741.57     5081.08    162.53 o 
  -6   5  13      319.87      170.13     83.48 o 
  -5   5  13      162.39      117.67     80.41 o 
  -4   5  13        1.56      -75.50     75.50 o 
  -3   5  13     2922.18     3441.69    128.92 o 
  -2   5  13      158.76      161.93     74.59 o 
  -1   5  13      357.21      528.17     79.65 o 
   0   5  13     1349.48     1457.55    107.08 o 
   1   5  13      362.86      347.62     86.24 o 
   2   5  13     1540.24     1448.13    119.45 o 
   3   5  13        5.44      -13.30     89.80 o 
   4   5  13     2694.95     2673.73    139.06 o 
   5   5  13     1132.68     1106.84    146.35 o 
   6   5  13       41.36      123.19    119.80 o 
   7   5  13       17.09     -120.40    120.40 o 
   8   5  13       17.65      -72.20    135.33 o 
   9   5  13      473.69      386.71    144.63 o 
  10   5  13       13.15      160.32    170.74 o 
  11   5  13      455.87      203.90    179.56 o 
  12   5  13       50.85      -14.59    180.05 o 
  13   5  13     1301.36     1012.97    209.48 o 
  14   5  13        0.38     -198.59    198.59 o 
  15   5  13      475.85     -114.82    245.39 o 
 -22   6  13     7433.66     7643.01    354.56 o 
 -21   6  13     2003.00     1772.58    235.00 o 
 -20   6  13    10517.93    10859.02    376.09 o 
 -19   6  13     2055.46     1514.81    186.76 o 
 -18   6  13    12154.80    12400.34    316.05 o 
 -17   6  13     1486.68     1112.54    165.71 o 
 -16   6  13    10886.89    11316.75    285.11 o 
 -15   6  13      816.40      810.17    148.23 o 
 -14   6  13    26348.38    26956.05    427.02 o 
 -13   6  13     4977.03     5521.55    236.77 o 
 -12   6  13    24117.19    23652.35    374.79 o 
 -11   6  13      630.67      431.72    112.78 o 
 -10   6  13    17567.12    16817.29    284.77 o 
  -9   6  13      665.89      495.75    126.23 o 
  -8   6  13    20513.46    20277.44    345.48 o 
  -7   6  13     2065.18     2467.99    150.53 o 
  -6   6  13    17632.39    17060.01    340.60 o 
  -5   6  13      753.19      946.47    105.99 o 
  -4   6  13    16890.08    16620.76    253.86 o 
  -3   6  13     3971.99     4698.29    159.56 o 
  -2   6  13    28465.98    27919.41    478.82 o 
  -1   6  13     6990.73     6868.10    171.83 o 
   0   6  13     6424.25     6025.65    181.61 o 
   1   6  13     2871.30     2977.98    160.82 o 
   2   6  13    13130.83    13119.69    248.84 o 
   3   6  13     8533.15     7991.31    224.54 o 
   4   6  13    13479.11    13297.92    279.59 o 
   5   6  13     2263.28     2211.25    220.90 o 
   6   6  13    34155.90    35662.86    609.57 o 
   7   6  13     3003.02     2932.99    219.29 o 
   8   6  13    20730.79    20952.72    394.03 o 
   9   6  13     3044.02     2814.76    211.64 o 
  10   6  13    15813.66    16215.04    591.95 o 
  11   6  13      776.11      347.46    202.99 o 
  12   6  13     7422.71     7802.68    354.57 o 
  13   6  13     1244.13      734.46    299.81 o 
  14   6  13     9000.41     9419.21    454.88 o 
 -21   7  13        3.61     -205.12    205.12 o 
 -20   7  13      598.52      418.39    196.89 o 
 -19   7  13       60.95       49.38    164.62 o 
 -18   7  13       73.41     -148.35    148.35 o 
 -17   7  13      698.24      570.31    156.14 o 
 -16   7  13       46.92      -64.65    136.18 o 
 -15   7  13      527.10      333.33    141.38 o 
 -14   7  13      516.91      314.84    171.35 o 
 -13   7  13     2150.07     2353.39    159.21 o 
 -12   7  13      960.43      736.07    120.90 o 
 -11   7  13       22.04     -128.46    128.46 o 
 -10   7  13      882.74      664.86    141.10 o 
  -9   7  13     3157.67     3308.25    266.22 o 
  -8   7  13      162.09      -36.43    114.77 o 
  -7   7  13      191.35       36.18    115.72 o 
  -6   7  13     1026.18      775.20    124.44 o 
  -5   7  13      353.80      399.92    108.34 o 
  -4   7  13     1317.64     1370.99    120.32 o 
  -3   7  13      656.51      418.53    107.78 o 
  -2   7  13      787.29      563.97     99.33 o 
  -1   7  13      413.83      221.81    102.97 o 
   0   7  13      594.43      313.83    137.52 o 
   1   7  13     1126.76     1069.24    127.24 o 
   2   7  13     1821.51     1697.81    129.36 o 
   3   7  13      220.08      131.61    106.17 o 
   4   7  13      215.80      137.75    115.83 o 
   5   7  13     1728.22     1732.51    164.92 o 
   6   7  13      271.48       31.88    136.57 o 
   7   7  13      230.85      297.04    155.42 o 
   8   7  13      104.96       25.63    158.23 o 
   9   7  13       12.70       -4.33    245.07 o 
  10   7  13       42.36      -12.53    180.22 o 
  11   7  13      718.91      258.58    197.04 o 
  12   7  13     1016.24      305.47    245.15 o 
  13   7  13      347.61      -95.91    223.02 o 
  14   7  13      109.70     -192.32    247.21 o 
 -21   8  13     5186.36     4997.03    637.05 o 
 -20   8  13     1833.41     1224.00    196.58 o 
 -19   8  13     6691.40     6314.52    265.81 o 
 -18   8  13     6420.81     6038.42    252.66 o 
 -17   8  13     9111.17     9537.95    280.30 o 
 -16   8  13     3451.32     2946.06    213.18 o 
 -15   8  13    12344.46    12299.11    285.86 o 
 -14   8  13     6231.00     6472.69    215.89 o 
 -13   8  13    19689.70    19269.81    388.61 o 
 -12   8  13     3523.70     3721.33    210.77 o 
 -11   8  13     7866.41     8009.30    256.41 o 
 -10   8  13      525.94      428.26    140.74 o 
  -9   8  13    19171.83    18397.65    347.80 o 
  -8   8  13     7849.36     8561.51    240.94 o 
  -7   8  13    24714.10    24176.44    397.15 o 
  -6   8  13     2533.12     2755.97    165.97 o 
  -5   8  13    16990.01    16048.17    304.60 o 
  -4   8  13     5419.43     6122.83    325.95 o 
  -3   8  13    19912.52    19662.08    318.06 o 
  -2   8  13     3756.11     4189.33    152.20 o 
  -1   8  13    20016.16    19650.58    386.50 o 
   0   8  13      285.45      233.01    151.75 o 
   1   8  13    18154.38    18160.74    348.99 o 
   2   8  13     4801.91     4769.21    244.93 o 
   3   8  13    21148.55    21592.97    348.64 o 
   4   8  13     3841.27     4045.70    176.15 o 
   5   8  13    20599.38    20585.45    470.70 o 
   6   8  13     2659.59     2375.17    254.18 o 
   7   8  13    14123.98    14665.22    573.89 o 
   8   8  13     6707.52     6337.27    286.69 o 
   9   8  13     9904.23    10662.22    348.15 o 
  10   8  13     1639.67     1788.89    222.98 o 
  11   8  13     4525.31     5025.80    300.78 o 
  12   8  13     4085.90     3662.59    348.41 o 
  13   8  13     6649.33     7696.38    534.94 o 
 -19   9  13      269.32      252.06    164.41 o 
 -18   9  13      356.86      298.27    228.97 o 
 -17   9  13       33.81     -172.05    172.05 o 
 -16   9  13       39.15      100.43    136.72 o 
 -15   9  13      838.68     1061.92    182.64 o 
 -14   9  13      258.86      140.83    155.91 o 
 -13   9  13      133.84     -143.56    143.56 o 
 -12   9  13     1152.46      938.88    166.01 o 
 -11   9  13      177.31     -135.07    135.07 o 
 -10   9  13     2296.89     2480.62    210.95 o 
  -9   9  13     1416.29     1416.99    159.61 o 
  -8   9  13        5.89      142.43    132.32 o 
  -7   9  13      119.57      103.46    124.54 o 
  -6   9  13       63.50       56.38    130.53 o 
  -5   9  13      345.98      271.39    146.53 o 
  -4   9  13      389.92      465.84    138.26 o 
  -3   9  13       58.98      -77.32    115.41 o 
  -2   9  13      438.83      304.59    136.70 o 
  -1   9  13     1498.31     1027.52    164.11 o 
   0   9  13       69.38       70.55    160.25 o 
   1   9  13      648.56      439.69    147.40 o 
   2   9  13      394.98       76.83    135.38 o 
   3   9  13      374.45      210.39    149.01 o 
   4   9  13        0.70     -141.78    141.78 o 
   5   9  13      631.10      696.26    186.87 o 
   6   9  13       26.99     -107.81    184.10 o 
   7   9  13     1586.51     1067.10    205.87 o 
   8   9  13     1935.60     1547.59    211.38 o 
   9   9  13       38.62     -201.75    201.75 o 
  10   9  13      636.11      230.45    198.92 o 
  11   9  13     1116.62      273.96    210.43 o 
  12   9  13      467.40       55.32    225.53 o 
 -18  10  13     7195.00     7325.90    305.68 o 
 -17  10  13     2053.63     1905.29    210.32 o 
 -16  10  13     6587.48     6608.86    279.66 o 
 -15  10  13     3837.13     3481.56    226.62 o 
 -14  10  13     9535.43     9642.71    304.37 o 
 -13  10  13     2670.72     2464.57    309.88 o 
 -12  10  13     9817.71     9919.33    288.63 o 
 -11  10  13      743.16      361.82    152.79 o 
 -10  10  13     7787.86     8219.66    262.40 o 
  -9  10  13     4500.58     4572.54    213.20 o 
  -8  10  13    20356.75    19939.97    398.26 o 
  -7  10  13     6983.47     7546.91    344.92 o 
  -6  10  13    14847.39    14690.10    310.42 o 
  -5  10  13     3451.84     3953.12    191.64 o 
  -4  10  13    15888.17    15699.80    330.59 o 
  -3  10  13     4057.36     4158.42    229.44 o 
  -2  10  13    18165.81    17947.15    390.02 o 
  -1  10  13     2261.43     2216.56    211.26 o 
   0  10  13    14340.98    14974.57    331.62 o 
   1  10  13     3116.22     2897.50    198.03 o 
   2  10  13     8414.82     8931.07    298.30 o 
   3  10  13     6008.85     6351.19    274.08 o 
   4  10  13    11853.27    12187.51    341.02 o 
   5  10  13      934.30      935.69    166.72 o 
   6  10  13     5326.87     6446.68    353.00 o 
   7  10  13     6058.25     5620.92    270.51 o 
   8  10  13     4168.71     5259.18    281.64 o 
   9  10  13      884.49      751.44    191.11 o 
  10  10  13     4764.31     6291.26    423.70 o 
 -16  11  13       26.24     -165.25    165.25 o 
 -15  11  13        2.13     -160.60    160.60 o 
 -14  11  13      223.47      221.21    169.53 o 
 -13  11  13      179.47      167.25    193.83 o 
 -12  11  13       11.04      -60.22    152.34 o 
 -11  11  13       19.61      -34.02    158.75 o 
 -10  11  13      175.86      169.75    209.44 o 
  -9  11  13       35.46     -144.67    144.67 o 
  -8  11  13      100.31      100.33    149.67 o 
  -7  11  13       13.28       71.64    141.98 o 
  -6  11  13      519.60      425.83    141.29 o 
  -5  11  13        3.98      -46.66    132.73 o 
  -4  11  13      709.61      353.05    155.74 o 
  -3  11  13       44.85        5.19    158.76 o 
  -2  11  13      260.51       81.30    166.44 o 
  -1  11  13      107.35     -166.28    166.28 o 
   0  11  13     2731.15     1963.97    197.02 o 
   1  11  13        1.80      -59.18    181.49 o 
   2  11  13      539.98       -3.55    160.29 o 
   3  11  13        3.80     -168.32    168.32 o 
   4  11  13      181.22     -190.52    190.52 o 
   5  11  13       14.28       92.44    220.12 o 
   6  11  13      888.65      489.85    261.28 o 
   7  11  13       10.53     -165.11    165.11 o 
   8  11  13      193.98     -172.45    172.45 o 
   9  11  13     1568.92      981.24    229.18 o 
 -14  12  13     2106.93     1797.31    267.05 o 
 -13  12  13     7686.50     7937.22    428.80 o 
 -12  12  13     3283.93     3526.43    333.34 o 
 -11  12  13     6112.93     6129.38    328.38 o 
 -10  12  13     5696.76     5654.80    241.60 o 
  -9  12  13     8067.93     8246.32    389.98 o 
  -8  12  13     4890.18     4820.25    254.86 o 
  -7  12  13     7777.14     7881.63    255.30 o 
  -6  12  13     4022.43     4287.49    211.01 o 
  -5  12  13     3040.71     3107.79    252.58 o 
  -4  12  13     3865.15     3836.02    197.21 o 
  -3  12  13     7816.35     8496.41    334.74 o 
  -2  12  13     6275.18     6430.07    328.30 o 
  -1  12  13     9173.25     9237.12    413.52 o 
   0  12  13     1625.08     1215.19    257.21 o 
   1  12  13     3449.84     4427.15    374.11 o 
   2  12  13     4740.29     4925.26    401.33 o 
   3  12  13     7623.73     8258.80    420.85 o 
   4  12  13     2091.07     1712.98    264.62 o 
   5  12  13     4441.19     5013.70    358.27 o 
   6  12  13     3910.45     3118.46    451.06 o 
 -11  13  13      143.05      181.19    255.74 o 
 -10  13  13      140.59       47.17    239.54 o 
  -9  13  13       67.95     -101.74    221.69 o 
  -8  13  13       83.90     -196.84    202.78 o 
  -7  13  13       33.63     -254.96    254.96 o 
  -6  13  13      448.89       -1.68    200.66 o 
  -5  13  13        7.27     -127.70    146.27 o 
  -4  13  13       74.44       51.37    150.80 o 
  -3  13  13      525.28      216.22    212.09 o 
  -2  13  13      284.03     -225.29    225.29 o 
  -1  13  13      479.88      263.11    469.10 o 
   0  13  13      237.35     -166.02    231.75 o 
   1  13  13      681.49      333.93    254.85 o 
   2  13  13       70.59     -245.47    245.47 o 
   3  13  13       26.74     -139.83    265.12 o 
  -5  14  13     4526.77     3797.57    812.75 o 
  -4  14  13     3095.04     2613.73    509.21 o 
  -3  14  13     8186.43     7066.86    946.85 o 
 -24   0  14      624.29      308.14    404.34 o 
 -22   0  14       47.25      216.58    350.03 o 
 -20   0  14      312.17      -15.13    369.80 o 
 -18   0  14     1107.88      844.38    244.10 o 
 -16   0  14     6449.93     6502.77    635.23 o 
 -14   0  14     4233.82     4048.12    207.60 o 
 -12   0  14     2903.44     2715.44    171.97 o 
 -10   0  14     3285.84     3303.23    163.82 o 
  -8   0  14      484.96      317.13     90.19 o 
  -6   0  14     2772.11     2794.91    248.36 o 
  -4   0  14     3310.38     4230.71    173.08 o 
  -2   0  14      721.82     1064.90    226.74 o 
   0   0  14    15297.35    17115.61    396.84 o 
   2   0  14    14053.90    15750.67    366.02 o 
   4   0  14     2848.42     3650.53    212.98 o 
   6   0  14     3424.11     3776.85    235.69 o 
   8   0  14       52.22      273.94    171.02 o 
  10   0  14      474.67      272.89    184.13 o 
  12   0  14      903.42      554.79    212.24 o 
  14   0  14     2716.37     3424.68    308.39 o 
  16   0  14      446.39      103.72    281.83 o 
 -24   1  14     4761.90     4211.80    369.78 o 
 -23   1  14     6013.32     6613.85    421.17 o 
 -22   1  14     5690.71     5276.75    407.94 o 
 -21   1  14     3625.26     3645.37    264.94 o 
 -20   1  14     2924.06     2851.12    231.50 o 
 -19   1  14    11414.97    11588.48    347.56 o 
 -18   1  14     8134.34     8899.40    318.68 o 
 -17   1  14     5357.70     5965.22    248.38 o 
 -16   1  14     3336.16     3584.54    178.98 o 
 -15   1  14    15252.26    14996.36    282.38 o 
 -14   1  14    14753.21    13830.35    248.52 o 
 -13   1  14    25905.59    25113.22    323.75 o 
 -12   1  14    22593.68    22584.95    295.15 o 
 -11   1  14    13364.53    12858.99    213.84 o 
 -10   1  14    14242.99    13902.28    201.90 o 
  -9   1  14    37074.30    35638.31    363.58 o 
  -8   1  14    50641.90    50340.96    470.23 o 
  -7   1  14     8793.10     8096.10    139.60 o 
  -6   1  14    36640.04    36169.41    352.20 o 
  -5   1  14     3731.13     3621.77    104.32 o 
  -4   1  14    47482.85    47498.38    478.94 o 
  -3   1  14    18101.68    17384.89    214.49 o 
  -2   1  14    33116.98    32047.66    313.65 o 
  -1   1  14    21862.67    21581.08    222.97 o 
   0   1  14     2833.28     2814.00     96.95 o 
   1   1  14    10190.42     9962.50    173.85 o 
   2   1  14    10706.99    10742.52    186.29 o 
   3   1  14    27339.24    27563.10    538.65 o 
   4   1  14     9701.07     9676.79    200.04 o 
   5   1  14      739.25      646.27    107.35 o 
   6   1  14    10267.44     9875.38    230.67 o 
   7   1  14    15418.37    15223.21    287.95 o 
   8   1  14    14518.13    13281.96    275.95 o 
   9   1  14     2461.55     2355.01    163.52 o 
  10   1  14     8368.61     8170.79    241.71 o 
  11   1  14     8491.85     8822.79    257.39 o 
  12   1  14     5271.89     5406.50    225.95 o 
  13   1  14     3482.43     3450.51    217.63 o 
  14   1  14     7720.55     8003.52    298.83 o 
  15   1  14     5552.48     5890.40    270.74 o 
  16   1  14     6027.50     5637.31    304.35 o 
 -24   2  14      377.30      245.39    246.82 o 
 -23   2  14       36.87      121.77    205.05 o 
 -22   2  14       19.74      -64.19    193.81 o 
 -21   2  14      827.11      605.50    189.07 o 
 -20   2  14      484.23      502.55    187.38 o 
 -19   2  14      494.48      322.88    163.84 o 
 -18   2  14        3.75      -83.36    141.46 o 
 -17   2  14     1936.60     1735.20    167.67 o 
 -16   2  14      297.26      179.61    137.55 o 
 -15   2  14     3217.21     3458.84    178.69 o 
 -14   2  14        5.91       -0.08    107.51 o 
 -13   2  14       64.15      -95.02     95.02 o 
 -12   2  14        0.61      -81.42     81.42 o 
 -11   2  14      388.19      392.04     93.48 o 
 -10   2  14      610.15      523.54     83.27 o 
  -9   2  14     3188.67     2840.69    106.60 o 
  -8   2  14     1667.13     1632.43    116.07 o 
  -7   2  14      772.40      675.80     73.52 o 
  -6   2  14      279.91      194.22     63.35 o 
  -5   2  14     2264.14     2701.04     92.56 o 
  -4   2  14      676.33      835.76     65.42 o 
  -3   2  14     1992.75     2478.09     87.60 o 
  -2   2  14     1165.55     1392.22     72.30 o 
  -1   2  14      565.55      738.54     65.91 o 
   0   2  14      116.13      150.71     60.50 o 
   1   2  14     5354.64     6152.50    133.27 o 
   2   2  14      960.14     1152.12     81.42 o 
   3   2  14      556.62      669.20     93.49 o 
   4   2  14     1916.04     2012.66    120.38 o 
   5   2  14     3875.71     4379.24    158.88 o 
   6   2  14       49.76      -98.22     98.22 o 
   7   2  14      648.64      774.31    125.26 o 
   8   2  14     2145.68     2093.34    152.38 o 
   9   2  14       20.39      265.77    128.10 o 
  10   2  14      114.13      141.44    129.97 o 
  11   2  14     3099.74     3101.62    196.84 o 
  12   2  14      126.29     -142.34    142.34 o 
  13   2  14       20.37      -54.21    154.85 o 
  14   2  14     1323.76     1394.42    230.72 o 
  15   2  14      217.43     -149.15    183.92 o 
  16   2  14      224.56      314.48    201.65 o 
 -24   3  14     2738.21     2904.22    302.10 o 
 -23   3  14     4386.82     4576.37    327.40 o 
 -22   3  14     5109.42     5747.62    350.93 o 
 -21   3  14     6080.74     6222.90    345.90 o 
 -20   3  14     4260.50     5002.70    279.09 o 
 -19   3  14     8940.50     9513.10    349.84 o 
 -18   3  14     7785.22     8083.55    266.97 o 
 -17   3  14    16362.84    16353.04    335.71 o 
 -16   3  14     2883.92     2718.96    180.27 o 
 -15   3  14     7822.16     8562.91    245.07 o 
 -14   3  14     7635.26     7504.35    214.66 o 
 -13   3  14    13935.86    14511.40    250.90 o 
 -12   3  14      380.70      174.34     96.66 o 
 -11   3  14    22010.17    21998.94    298.52 o 
 -10   3  14    10657.55    10283.39    174.00 o 
  -9   3  14    41830.39    41529.75    411.55 o 
  -8   3  14    11300.04    10711.71    169.29 o 
  -7   3  14    46461.79    47613.21    481.06 o 
  -6   3  14      505.86      276.88     64.52 o 
  -5   3  14    19522.81    19387.09    222.58 o 
  -4   3  14    10575.62    10461.32    188.22 o 
  -3   3  14    27250.99    26141.77    249.51 o 
  -2   3  14    13685.49    12996.19    166.11 o 
  -1   3  14    17230.68    16288.08    228.68 o 
   0   3  14     9873.34    10525.34    174.96 o 
   1   3  14    28301.23    27718.31    335.94 o 
   2   3  14    29976.21    29666.33    356.77 o 
   3   3  14     9658.58     8813.03    186.26 o 
   4   3  14    11943.31    11917.25    216.58 o 
   5   3  14    10031.22     9045.55    197.43 o 
   6   3  14    10671.97    10727.43    220.65 o 
   7   3  14    10634.32     9589.55    220.54 o 
   8   3  14    12186.62    12278.89    264.80 o 
   9   3  14    16468.02    15412.75    318.18 o 
  10   3  14     4909.89     6010.71    229.36 o 
  11   3  14    14083.96    13241.04    311.40 o 
  12   3  14     4362.63     4949.92    235.33 o 
  13   3  14     7383.34     7140.18    285.00 o 
  14   3  14     1471.54     1419.59    202.85 o 
  15   3  14     8911.36     9120.68    329.09 o 
 -23   4  14       14.41      209.11    228.98 o 
 -22   4  14      903.05      961.35    238.63 o 
 -21   4  14        3.17     -104.93    192.18 o 
 -20   4  14     1015.45      696.77    203.99 o 
 -19   4  14        8.45      101.48    196.12 o 
 -18   4  14     3882.97     3224.57    219.28 o 
 -17   4  14      878.95      483.86    163.22 o 
 -16   4  14     2642.75     2183.43    177.66 o 
 -15   4  14        1.04     -129.68    129.68 o 
 -14   4  14     4133.57     3919.00    191.56 o 
 -13   4  14      287.05       95.33    120.06 o 
 -12   4  14     1529.84     1181.24    133.91 o 
 -11   4  14      191.28      116.84    133.82 o 
 -10   4  14     5492.77     5517.07    168.82 o 
  -9   4  14      590.03      426.05     87.50 o 
  -8   4  14     3515.81     3362.77    112.53 o 
  -7   4  14     2308.23     2616.18     95.70 o 
  -6   4  14       41.41      -56.33     56.33 o 
  -5   4  14     1671.02     1883.91    101.86 o 
  -4   4  14      935.75      947.80     77.97 o 
  -3   4  14      237.09      208.94     66.91 o 
  -2   4  14      615.19      525.22     90.28 o 
  -1   4  14     3513.50     3673.71    140.35 o 
   0   4  14     8647.07     8811.24    164.84 o 
   1   4  14      278.06      130.52     81.03 o 
   2   4  14      333.50      377.10     93.94 o 
   3   4  14     4111.81     4549.40    164.92 o 
   4   4  14     1295.10     1426.86    122.68 o 
   5   4  14      259.79      182.82    117.85 o 
   6   4  14      682.53      640.13    157.12 o 
   7   4  14       72.62      -10.29    132.99 o 
   8   4  14       61.49        2.62    139.86 o 
   9   4  14       52.69       67.15    142.96 o 
  10   4  14       30.55      126.93    158.61 o 
  11   4  14     1236.21     1630.92    200.81 o 
  12   4  14     3244.77     2393.98    246.19 o 
  13   4  14       74.90       56.57    201.82 o 
  14   4  14      184.35       61.16    207.96 o 
  15   4  14       15.71     -216.42    216.42 o 
 -23   5  14     2778.08     3110.92    300.41 o 
 -22   5  14     8974.03     9683.08    416.05 o 
 -21   5  14     3170.17     3626.79    269.11 o 
 -20   5  14    11962.35    12021.71    378.79 o 
 -19   5  14     1850.14     1665.92    216.13 o 
 -18   5  14    15570.47    16423.94    380.44 o 
 -17   5  14     1923.10     2267.47    186.39 o 
 -16   5  14    15434.60    15933.02    330.96 o 
 -15   5  14     5174.64     5806.19    255.54 o 
 -14   5  14    11235.20    11241.17    268.71 o 
 -13   5  14    14988.47    14717.13    518.22 o 
 -12   5  14    10656.66    11421.30    254.26 o 
 -11   5  14     2952.02     2993.83    221.37 o 
 -10   5  14    16774.59    17268.13    293.54 o 
  -9   5  14     3584.13     3294.30    197.27 o 
  -8   5  14    16148.83    15817.08    239.89 o 
  -7   5  14     8533.15     7992.30    205.81 o 
  -6   5  14    16270.77    15941.51    268.35 o 
  -5   5  14     2022.96     1891.02    120.00 o 
  -4   5  14    20412.27    20042.69    286.11 o 
  -3   5  14    17570.54    17415.63    293.83 o 
  -2   5  14    25192.06    25295.18    369.26 o 
  -1   5  14     1890.08     1931.71    124.09 o 
   0   5  14    36574.00    36436.44    414.13 o 
   1   5  14     8565.53     8308.04    178.05 o 
   2   5  14    29173.06    27747.90    375.81 o 
   3   5  14    12111.86    12073.33    261.81 o 
   4   5  14    31450.63    30059.03    402.77 o 
   5   5  14    15569.23    16183.03    308.53 o 
   6   5  14    16843.83    16801.99    314.81 o 
   7   5  14     4853.05     5713.54    226.09 o 
   8   5  14    12967.47    12201.95    303.54 o 
   9   5  14     4725.53     5763.73    248.34 o 
  10   5  14    14848.46    14587.37    377.99 o 
  11   5  14     3461.97     4191.61    303.55 o 
  12   5  14     5860.11     6399.53    329.55 o 
  13   5  14     2906.19     3466.55    352.92 o 
  14   5  14     2669.73     2550.63    272.70 o 
 -22   6  14       12.69     -209.67    209.67 o 
 -21   6  14     1968.85     2037.59    242.00 o 
 -20   6  14       72.18      -68.24    183.98 o 
 -19   6  14     2235.19     2156.13    212.90 o 
 -18   6  14      492.22      393.58    161.64 o 
 -17   6  14     5635.91     5992.57    271.48 o 
 -16   6  14     1685.25     1620.35    168.94 o 
 -15   6  14     1605.39     1516.12    157.48 o 
 -14   6  14       33.41     -148.73    148.73 o 
 -13   6  14     9113.82     8951.45    238.89 o 
 -12   6  14      307.70      237.00    134.20 o 
 -11   6  14      499.24      272.09    107.59 o 
 -10   6  14     2049.18     2096.20    126.57 o 
  -9   6  14     6433.65     6503.50    219.12 o 
  -8   6  14     3248.88     3272.66    169.63 o 
  -7   6  14       62.09       -1.19    116.48 o 
  -6   6  14      489.03      420.64    115.94 o 
  -5   6  14      622.38      447.91    111.07 o 
  -4   6  14      285.84      -37.36     96.31 o 
  -3   6  14       28.64      -24.65     95.09 o 
  -2   6  14       34.61       62.59     98.03 o 
  -1   6  14     5070.04     5728.38    198.05 o 
   0   6  14       53.97      108.80     99.63 o 
   1   6  14     3871.12     4141.32    164.09 o 
   2   6  14      136.67      114.85    126.84 o 
   3   6  14      568.19      386.60    130.26 o 
   4   6  14      894.03      952.90    137.53 o 
   5   6  14      396.62      414.39    147.78 o 
   6   6  14       15.81      -63.06    141.71 o 
   7   6  14       24.47      265.26    168.26 o 
   8   6  14      110.47     -142.27    142.27 o 
   9   6  14      648.52      450.26    192.00 o 
  10   6  14      688.51      499.83    203.24 o 
  11   6  14     1236.17      543.18    237.55 o 
  12   6  14      639.50      180.98    236.38 o 
  13   6  14      923.44      792.59    251.81 o 
  14   6  14      211.68     -238.15    238.15 o 
 -21   7  14     7482.31     7352.90    335.73 o 
 -20   7  14      121.75      111.09    188.39 o 
 -19   7  14     6664.53     7218.41    276.94 o 
 -18   7  14      477.06      545.44    170.38 o 
 -17   7  14     4236.26     4377.26    219.07 o 
 -16   7  14     3388.35     2832.90    190.05 o 
 -15   7  14    12572.13    12762.75    401.99 o 
 -14   7  14     3801.90     3709.85    188.49 o 
 -13   7  14    20914.81    21016.03    356.95 o 
 -12   7  14     9647.56     8919.78    254.30 o 
 -11   7  14    15936.40    15871.35    335.08 o 
 -10   7  14     2454.00     2207.43    171.36 o 
  -9   7  14    12376.89    12500.43    285.47 o 
  -8   7  14    10542.82     9221.22    260.12 o 
  -7   7  14     9334.65     9509.46    256.35 o 
  -6   7  14     2558.43     2220.24    181.58 o 
  -5   7  14    22530.18    22157.83    340.28 o 
  -4   7  14     5908.12     5711.41    183.37 o 
  -3   7  14    10346.73    10115.05    219.37 o 
  -2   7  14     1012.11      733.63    111.66 o 
  -1   7  14    22679.50    22174.71    362.99 o 
   0   7  14      863.05      726.11    117.60 o 
   1   7  14     5166.54     5616.49    185.35 o 
   2   7  14     5646.03     6382.29    232.37 o 
   3   7  14    28435.47    27596.62    436.25 o 
   4   7  14     3324.79     3750.24    186.78 o 
   5   7  14    17772.80    17762.41    372.17 o 
   6   7  14     2490.31     2726.77    195.48 o 
   7   7  14     9177.71     9305.73    320.60 o 
   8   7  14     2995.42     3818.09    255.43 o 
   9   7  14    15327.66    15146.45    410.69 o 
  10   7  14     1610.19     2413.32    274.19 o 
  11   7  14     9859.33    10566.01    441.48 o 
  12   7  14      324.60      110.44    247.30 o 
  13   7  14     5929.15     6653.70    452.07 o 
 -20   8  14      896.86      880.06    190.58 o 
 -19   8  14      983.58      587.58    196.99 o 
 -18   8  14      755.34      533.89    165.10 o 
 -17   8  14      161.76     -171.64    171.64 o 
 -16   8  14      244.33      -71.43    138.52 o 
 -15   8  14        7.77       67.19    128.33 o 
 -14   8  14      571.08      741.12    180.95 o 
 -13   8  14     1093.83      942.14    170.15 o 
 -12   8  14     2130.26     1808.80    181.18 o 
 -11   8  14      165.52       -8.58    140.83 o 
 -10   8  14      359.89      244.40    147.58 o 
  -9   8  14        7.57       80.75    135.75 o 
  -8   8  14     1665.12     1686.78    167.80 o 
  -7   8  14      857.23      990.30    148.00 o 
  -6   8  14      140.35       12.23    130.55 o 
  -5   8  14      309.16      219.78    125.92 o 
  -4   8  14       58.22       49.99    135.73 o 
  -3   8  14      708.38      808.02    121.45 o 
  -2   8  14     1311.88     1179.10    136.57 o 
  -1   8  14       57.40       64.57    109.01 o 
   0   8  14      509.90      430.87    141.24 o 
   1   8  14       35.16      -21.09    105.91 o 
   2   8  14      547.11      402.84    146.97 o 
   3   8  14      124.65      141.09    115.82 o 
   4   8  14      688.45      697.58    136.46 o 
   5   8  14      916.74      631.47    167.95 o 
   6   8  14       71.40     -117.92    159.37 o 
   7   8  14      856.66      367.47    222.93 o 
   8   8  14      181.99      264.06    179.38 o 
   9   8  14      623.67      722.24    230.32 o 
  10   8  14      597.62      196.52    199.01 o 
  11   8  14     2197.72     1189.91    262.19 o 
  12   8  14      229.12      -59.23    257.57 o 
 -19   9  14       28.97     -187.47    187.47 o 
 -18   9  14     6993.67     6683.44    255.49 o 
 -17   9  14      729.64      565.90    154.00 o 
 -16   9  14     7742.96     8263.42    342.46 o 
 -15   9  14      761.99      420.38    175.55 o 
 -14   9  14    15160.50    14958.40    355.79 o 
 -13   9  14      813.94      703.44    169.26 o 
 -12   9  14     7426.96     7829.04    283.22 o 
 -11   9  14     1285.34     1215.12    174.20 o 
 -10   9  14    16273.21    16428.54    445.23 o 
  -9   9  14     2501.29     2317.43    218.25 o 
  -8   9  14     6216.75     7226.01    263.97 o 
  -7   9  14     4080.62     3432.69    201.52 o 
  -6   9  14    28750.70    29506.20    465.65 o 
  -5   9  14     1459.62     1175.61    147.76 o 
  -4   9  14    12792.43    13237.36    285.53 o 
  -3   9  14     1709.35     1693.69    150.04 o 
  -2   9  14    28379.88    29322.10    510.82 o 
  -1   9  14      318.46      181.02    150.83 o 
   0   9  14    15879.07    15644.92    335.21 o 
   1   9  14     2333.49     2130.16    182.19 o 
   2   9  14    13900.65    13620.25    320.31 o 
   3   9  14     1308.22     1504.75    143.81 o 
   4   9  14    12214.76    12408.97    308.77 o 
   5   9  14      391.40      270.13    180.24 o 
   6   9  14     6004.70     6747.42    278.22 o 
   7   9  14      552.45      448.23    177.38 o 
   8   9  14    11374.58    12062.61    372.15 o 
   9   9  14      363.41      294.02    219.10 o 
  10   9  14     8066.63     8963.82    360.81 o 
  11   9  14      189.25      266.19    263.53 o 
 -18  10  14      358.26      236.89    205.17 o 
 -17  10  14       30.21      108.31    188.51 o 
 -16  10  14       11.99        4.65    184.70 o 
 -15  10  14      133.81       16.63    178.15 o 
 -14  10  14     1669.59     1447.45    201.38 o 
 -13  10  14       83.29     -180.98    180.98 o 
 -12  10  14      866.51      926.20    211.92 o 
 -11  10  14      359.43      164.71    157.17 o 
 -10  10  14     1253.45     1422.30    183.61 o 
  -9  10  14       26.93       -7.35    149.48 o 
  -8  10  14      224.09      153.45    147.02 o 
  -7  10  14     5663.02     5314.57    233.52 o 
  -6  10  14       27.69     -130.09    130.09 o 
  -5  10  14     1066.86      850.11    144.53 o 
  -4  10  14     1061.03      942.81    144.73 o 
  -3  10  14     1466.81     1195.78    144.39 o 
  -2  10  14     1813.03     1561.09    197.34 o 
  -1  10  14     3118.56     2967.67    233.95 o 
   0  10  14      338.21     -133.60    143.82 o 
   1  10  14       66.93     -145.79    145.79 o 
   2  10  14      140.60     -161.02    161.02 o 
   3  10  14     1232.36      625.92    184.18 o 
   4  10  14      778.00      460.73    165.23 o 
   5  10  14       32.63     -154.62    154.62 o 
   6  10  14      731.36      383.65    165.97 o 
   7  10  14       11.83     -164.70    164.70 o 
   8  10  14      182.21     -184.36    184.36 o 
   9  10  14      149.74     -190.01    190.01 o 
  10  10  14     1083.45      166.61    534.38 o 
 -16  11  14     1031.37      931.71    205.77 o 
 -15  11  14     9818.18     9593.22    484.73 o 
 -14  11  14      958.40      901.33    302.29 o 
 -13  11  14     8399.42     8500.23    304.55 o 
 -12  11  14     1262.51      647.71    185.27 o 
 -11  11  14    17927.18    17933.35    656.30 o 
 -10  11  14      109.59      -13.68    160.52 o 
  -9  11  14    15779.48    16004.56    367.60 o 
  -8  11  14      115.97     -149.15    149.15 o 
  -7  11  14    10094.08    10245.05    279.36 o 
  -6  11  14      706.12      208.43    145.39 o 
  -5  11  14    11871.94    11561.33    321.49 o 
  -4  11  14      977.81      559.66    206.14 o 
  -3  11  14     8425.60     8536.84    299.52 o 
  -2  11  14      467.21      277.89    187.32 o 
  -1  11  14    12794.69    12871.12    344.71 o 
   0  11  14       31.52     -162.23    162.23 o 
   1  11  14    12533.86    13351.88    381.52 o 
   2  11  14      325.36       94.82    175.24 o 
   3  11  14     7622.51     8783.47    304.64 o 
   4  11  14      807.63      725.48    237.80 o 
   5  11  14     3997.78     4408.59    241.98 o 
   6  11  14      450.28      350.08    195.00 o 
   7  11  14     4047.28     4836.87    303.26 o 
   8  11  14       93.09       40.42    191.77 o 
 -14  12  14       77.98     -158.45    226.31 o 
 -13  12  14       99.54     -159.63    159.63 o 
 -12  12  14      476.25      449.23    178.14 o 
 -11  12  14       18.69      -15.33    162.68 o 
 -10  12  14       32.00       36.71    204.00 o 
  -9  12  14     1438.42     1461.62    186.06 o 
  -8  12  14      722.15      697.23    161.82 o 
  -7  12  14       46.17     -146.60    146.60 o 
  -6  12  14     1763.39     1627.16    175.15 o 
  -5  12  14     2352.84     1793.19    172.86 o 
  -4  12  14       29.75     -155.31    155.31 o 
  -3  12  14       46.67     -169.38    169.38 o 
  -2  12  14     2173.40     2138.27    235.97 o 
  -1  12  14     1174.73      465.13    278.77 o 
   0  12  14      324.25      -70.31    290.89 o 
   1  12  14      771.18       62.98    247.46 o 
   2  12  14      216.07     -239.80    239.80 o 
   3  12  14      727.52       58.01    337.42 o 
   4  12  14       58.51     -270.18    270.18 o 
   5  12  14      943.61      338.57    326.63 o 
   6  12  14        5.50     -310.88    495.78 o 
 -11  13  14       31.55     -415.40    415.40 o 
 -10  13  14     7735.51     8080.43    471.77 o 
  -9  13  14       34.79      -18.70    216.44 o 
  -8  13  14     8484.36     8648.74    408.31 o 
  -7  13  14       74.79     -151.92    157.33 o 
  -6  13  14     9923.41    10771.34    386.50 o 
  -5  13  14        2.90     -154.82    154.82 o 
  -4  13  14     9416.61     9755.71    292.41 o 
  -3  13  14      128.51     -230.55    230.55 o 
  -2  13  14     8228.80     8367.91    413.27 o 
  -1  13  14        4.93     -243.62    243.62 o 
   0  13  14     6674.44     7042.76    404.67 o 
   1  13  14       88.34     -361.11    406.47 o 
   2  13  14     4061.02     4995.45    688.46 o 
 -23   0  15     7561.97     8191.30    638.13 o 
 -21   0  15    10819.87    11437.38    652.24 o 
 -19   0  15     8857.63     9770.77    465.63 o 
 -17   0  15    14113.51    14378.37    504.56 o 
 -15   0  15    25293.57    25621.59    505.33 o 
 -13   0  15    20103.25    19542.38    449.03 o 
 -11   0  15    62557.57    61700.47    894.98 o 
  -9   0  15    11696.71    11370.88    251.38 o 
  -7   0  15    47178.99    46010.37    683.71 o 
  -5   0  15    28017.72    28707.91    784.81 o 
  -3   0  15    32228.41    33873.87    597.32 o 
  -1   0  15    36904.27    37521.55    581.35 o 
   1   0  15    15846.88    15653.54    329.09 o 
   3   0  15    13358.95    12888.18    343.17 o 
   5   0  15    17239.19    16397.45    415.67 o 
   7   0  15    12495.11    12634.74    381.97 o 
   9   0  15    10928.23    10194.50    363.80 o 
  11   0  15    15006.28    14426.79    447.81 o 
  13   0  15    10536.36    11408.89    427.89 o 
  15   0  15    11311.11    12617.21    551.69 o 
 -24   1  15      729.62     1312.68    426.72 o 
 -23   1  15     1508.83     1414.29    297.18 o 
 -22   1  15     1065.72      932.50    238.37 o 
 -21   1  15      296.75      287.07    204.83 o 
 -20   1  15      619.79      294.31    205.45 o 
 -19   1  15     1491.05     1076.78    210.49 o 
 -18   1  15      892.24      570.63    195.17 o 
 -17   1  15      817.03      483.15    140.43 o 
 -16   1  15     1154.07     1018.48    140.40 o 
 -15   1  15      146.44       -4.52    124.62 o 
 -14   1  15      774.38      488.86    109.08 o 
 -13   1  15     5193.13     5473.81    180.26 o 
 -12   1  15     5624.62     6166.89    184.70 o 
 -11   1  15     4082.03     4180.41    138.72 o 
 -10   1  15     1857.74     2084.89    113.14 o 
  -9   1  15     6660.10     6901.45    148.45 o 
  -8   1  15    15935.91    15531.66    216.80 o 
  -7   1  15    12308.43    12407.54    186.82 o 
  -6   1  15      148.17       91.03     70.46 o 
  -5   1  15     4033.37     4559.84    129.16 o 
  -4   1  15     5858.26     6725.76    143.41 o 
  -3   1  15     5674.98     5938.14    149.70 o 
  -2   1  15     4799.75     5719.79    137.43 o 
  -1   1  15     4383.62     5157.13    143.10 o 
   0   1  15     1446.71     1595.81     98.19 o 
   1   1  15      790.94     1152.58    101.11 o 
   2   1  15     2130.94     2268.05    122.64 o 
   3   1  15     3700.85     4742.91    165.96 o 
   4   1  15     3601.11     3946.31    179.61 o 
   5   1  15       44.17       12.65    104.56 o 
   6   1  15      266.91      224.04    116.10 o 
   7   1  15     1058.36      837.86    132.03 o 
   8   1  15     2178.96     2233.00    157.57 o 
   9   1  15      588.34      345.40    132.50 o 
  10   1  15      652.97      457.33    141.51 o 
  11   1  15      802.91      637.60    147.57 o 
  12   1  15      170.52     -136.98    136.98 o 
  13   1  15     1451.46     1083.29    184.86 o 
  14   1  15     1092.40      704.75    183.27 o 
  15   1  15       30.72       -7.63    178.19 o 
 -24   2  15     4889.31     5089.13    378.47 o 
 -23   2  15       20.73      153.87    221.78 o 
 -22   2  15     7165.91     7846.97    336.79 o 
 -21   2  15      201.57     -107.39    181.61 o 
 -20   2  15    11411.89    11647.25    355.57 o 
 -19   2  15      677.03      631.41    182.90 o 
 -18   2  15    13460.65    13246.75    330.34 o 
 -17   2  15      204.91       41.59    136.02 o 
 -16   2  15    30788.49    32326.05    483.16 o 
 -15   2  15       20.31     -112.87    112.87 o 
 -14   2  15    19548.30    19384.04    318.40 o 
 -13   2  15     5636.76     6096.50    191.33 o 
 -12   2  15    29440.69    29104.74    368.28 o 
 -11   2  15     1191.87     1271.02     97.98 o 
 -10   2  15    26909.91    26893.74    322.30 o 
  -9   2  15     6573.55     6412.37    138.20 o 
  -8   2  15    35681.08    35626.68    380.50 o 
  -7   2  15       68.22      -25.58     67.18 o 
  -6   2  15    53044.89    52168.15    504.12 o 
  -5   2  15     1497.51     1398.91     81.15 o 
  -4   2  15    12106.53    11811.97    167.02 o 
  -3   2  15      314.95      158.21     59.94 o 
  -2   2  15    36319.00    36128.09    353.73 o 
  -1   2  15      451.24      318.11     64.90 o 
   0   2  15    26947.81    26489.20    301.87 o 
   1   2  15     1058.68     1171.44    107.32 o 
   2   2  15    23504.79    22770.13    315.34 o 
   3   2  15       38.10      -41.28     91.84 o 
   4   2  15    18652.61    17552.95    295.09 o 
   5   2  15      522.35      391.35    111.25 o 
   6   2  15    25103.21    24282.74    482.56 o 
   7   2  15       23.73     -103.49    114.12 o 
   8   2  15    19495.52    19347.99    341.60 o 
   9   2  15     1240.20      807.67    138.70 o 
  10   2  15    19270.59    18656.30    349.96 o 
  11   2  15      237.38       46.04    143.35 o 
  12   2  15    14151.17    14341.92    342.56 o 
  13   2  15      278.77      -25.88    155.62 o 
  14   2  15     9351.73     9570.81    336.93 o 
  15   2  15       30.53     -109.81    185.86 o 
 -24   3  15     2651.76     3310.18    310.08 o 
 -23   3  15      553.84      110.09    224.45 o 
 -22   3  15     1221.88     1322.94    250.85 o 
 -21   3  15     2754.27     2740.55    271.93 o 
 -20   3  15     2763.07     2782.91    243.80 o 
 -19   3  15     2032.82     1712.63    215.31 o 
 -18   3  15      670.73      165.00    164.69 o 
 -17   3  15     4210.07     4647.57    229.49 o 
 -16   3  15      156.82       49.16    131.08 o 
 -15   3  15      919.47      774.02    142.09 o 
 -14   3  15      589.73      448.57    132.65 o 
 -13   3  15      685.55      566.93    119.46 o 
 -12   3  15     1378.66     1106.89    121.31 o 
 -11   3  15      250.22      193.69     93.32 o 
 -10   3  15     4247.58     4343.64    131.49 o 
  -9   3  15       56.69      -24.23     72.10 o 
  -8   3  15     5086.99     4903.98    133.54 o 
  -7   3  15     2001.63     1890.27     96.14 o 
  -6   3  15     4155.50     4445.89    113.82 o 
  -5   3  15      207.46      135.12     62.49 o 
  -4   3  15     3033.93     3658.32     93.04 o 
  -3   3  15     6375.99     6676.02    115.87 o 
  -2   3  15     5776.85     6098.53    115.48 o 
  -1   3  15      106.43       42.31     80.74 o 
   0   3  15     1428.00     1859.92    108.81 o 
   1   3  15       25.46      -11.19     84.84 o 
   2   3  15     3841.22     4243.14    193.64 o 
   3   3  15      141.59      166.61    104.19 o 
   4   3  15     1906.13     2101.06    142.16 o 
   5   3  15     1645.61     1576.58    138.06 o 
   6   3  15     1743.56     1838.16    135.66 o 
   7   3  15     3303.26     3575.06    168.82 o 
   8   3  15     1253.90     1206.11    129.24 o 
   9   3  15     3393.01     3656.41    191.44 o 
  10   3  15       40.59       18.97    130.94 o 
  11   3  15       33.36      167.41    144.48 o 
  12   3  15      441.00       26.88    154.10 o 
  13   3  15      930.63      583.22    177.25 o 
  14   3  15     1259.87      672.10    189.19 o 
  15   3  15      327.86      229.30    184.35 o 
 -23   4  15     7222.74     8001.87    402.82 o 
 -22   4  15      267.67     -111.70    210.34 o 
 -21   4  15     9168.72     9983.62    371.32 o 
 -20   4  15      140.71     -177.70    177.70 o 
 -19   4  15    10731.74    11140.45    359.43 o 
 -18   4  15     1765.38     1505.26    190.88 o 
 -17   4  15    25007.71    26466.84    537.54 o 
 -16   4  15      682.08      754.74    164.10 o 
 -15   4  15    10563.03    11128.49    273.35 o 
 -14   4  15     5161.81     5832.98    216.30 o 
 -13   4  15    17513.78    18017.01    328.42 o 
 -12   4  15      440.23      490.60    119.86 o 
 -11   4  15    10459.55    10531.20    233.89 o 
 -10   4  15     7012.41     7437.30    195.80 o 
  -9   4  15    21643.46    20873.31    298.66 o 
  -8   4  15     4338.90     4672.23    143.90 o 
  -7   4  15    22112.44    21752.05    275.32 o 
  -6   4  15       31.01      -57.18     57.86 o 
  -5   4  15    33182.58    31875.20    368.29 o 
  -4   4  15      314.85      221.92     75.60 o 
  -3   4  15    19174.12    18934.07    231.36 o 
  -2   4  15      215.20      153.67     80.23 o 
  -1   4  15    56112.39    54679.05    587.67 o 
   0   4  15       53.14      -80.15     84.17 o 
   1   4  15    26236.47    26427.60    337.32 o 
   2   4  15     1376.27      998.42    106.61 o 
   3   4  15    35374.93    34746.48    419.02 o 
   4   4  15       82.18       -6.99    119.72 o 
   5   4  15    21232.31    20764.48    401.39 o 
   6   4  15      406.40      371.67    161.90 o 
   7   4  15    23257.71    23632.13    453.37 o 
   8   4  15      796.78      650.76    162.61 o 
   9   4  15    19616.25    19561.54    423.08 o 
  10   4  15       22.38     -151.23    151.23 o 
  11   4  15     6795.11     7967.33    309.06 o 
  12   4  15      546.10      424.11    204.68 o 
  13   4  15     8341.97     9004.79    373.83 o 
  14   4  15       78.52     -202.58    202.58 o 
 -23   5  15     1171.61     1156.59    264.26 o 
 -22   5  15     1288.69     1512.86    306.24 o 
 -21   5  15     1675.00     1584.36    232.95 o 
 -20   5  15      426.33      222.99    193.42 o 
 -19   5  15     2016.07     2198.81    209.60 o 
 -18   5  15      465.08      100.14    168.40 o 
 -17   5  15     1355.26     1029.97    178.15 o 
 -16   5  15      921.36      566.62    149.89 o 
 -15   5  15     6999.38     7082.77    239.02 o 
 -14   5  15      452.83      214.62    129.07 o 
 -13   5  15     7785.81     7914.18    234.87 o 
 -12   5  15     4620.50     5041.29    192.03 o 
 -11   5  15     3650.46     3623.12    178.17 o 
 -10   5  15      425.40      438.47    110.66 o 
  -9   5  15     1792.20     1834.46    124.82 o 
  -8   5  15       38.42      -62.52    109.83 o 
  -7   5  15       74.04      -84.12    101.37 o 
  -6   5  15       26.58       46.62     96.66 o 
  -5   5  15     4464.39     5103.13    168.04 o 
  -4   5  15      618.47      428.22     96.56 o 
  -3   5  15     2080.79     2317.72    123.27 o 
  -2   5  15     1413.22     1554.99    122.00 o 
  -1   5  15      971.78     1282.95    116.83 o 
   0   5  15      215.32      335.37    115.35 o 
   1   5  15     2134.91     2578.08    135.98 o 
   2   5  15       34.74      -29.88     99.40 o 
   3   5  15     1797.12     1948.70    147.59 o 
   4   5  15     1200.45     1326.75    141.84 o 
   5   5  15     1590.14     1737.99    153.70 o 
   6   5  15     1140.50      881.78    154.58 o 
   7   5  15     4818.96     5119.34    242.06 o 
   8   5  15     2104.48     2265.62    200.86 o 
   9   5  15     1538.64     1359.88    183.57 o 
  10   5  15      647.70      518.68    195.26 o 
  11   5  15     1148.08      596.59    231.76 o 
  12   5  15        8.02     -192.85    192.85 o 
  13   5  15      761.90      134.81    216.39 o 
  14   5  15       89.80      -98.86    219.39 o 
 -22   6  15     9414.39     9727.27    379.90 o 
 -21   6  15      445.61      501.98    218.24 o 
 -20   6  15     6366.48     6239.01    292.63 o 
 -19   6  15      770.53      504.07    188.25 o 
 -18   6  15    13818.13    14194.22    356.58 o 
 -17   6  15      362.28      133.78    146.03 o 
 -16   6  15     4621.92     5031.96    223.68 o 
 -15   6  15     1863.47     1787.90    206.83 o 
 -14   6  15    10400.24    10888.04    267.77 o 
 -13   6  15     1988.73     2253.61    157.65 o 
 -12   6  15    26537.30    26246.05    422.69 o 
 -11   6  15      632.56      635.87    116.22 o 
 -10   6  15    14049.98    13429.32    319.44 o 
  -9   6  15     2471.56     2992.65    188.44 o 
  -8   6  15    18237.54    17358.57    349.58 o 
  -7   6  15      573.16      436.57    134.71 o 
  -6   6  15    21804.11    21647.40    358.79 o 
  -5   6  15      425.22      503.15    114.24 o 
  -4   6  15    18906.51    18636.70    304.04 o 
  -3   6  15     3653.67     3457.86    155.13 o 
  -2   6  15    20394.30    19912.81    338.65 o 
  -1   6  15      125.52       26.68    111.59 o 
   0   6  15    17697.13    17923.79    304.51 o 
   1   6  15     7103.87     7129.48    206.68 o 
   2   6  15     5163.93     5676.59    241.59 o 
   3   6  15     6469.51     6153.44    215.04 o 
   4   6  15    26487.27    26713.12    435.89 o 
   5   6  15     5296.43     4752.64    230.42 o 
   6   6  15    10924.59    10909.81    306.22 o 
   7   6  15     7347.23     6997.01    309.78 o 
   8   6  15    13628.28    13922.59    425.00 o 
   9   6  15       88.84     -372.62    374.70 o 
  10   6  15     6404.55     8256.87    572.63 o 
  11   6  15      934.37      145.95    248.48 o 
  12   6  15     6947.32     7760.65    462.00 o 
  13   6  15      721.68      558.61    443.99 o 
 -21   7  15       68.51      155.77    207.56 o 
 -20   7  15     3105.26     2973.92    235.76 o 
 -19   7  15      853.63     1080.66    374.17 o 
 -18   7  15     2517.26     2291.32    196.10 o 
 -17   7  15      138.22      256.13    181.30 o 
 -16   7  15     2936.12     2938.58    194.09 o 
 -15   7  15       87.09      -74.20    144.48 o 
 -14   7  15     2353.67     2299.65    164.72 o 
 -13   7  15      605.80      466.46    124.81 o 
 -12   7  15     2192.88     1891.82    186.55 o 
 -11   7  15     3456.31     3666.69    218.91 o 
 -10   7  15     2097.17     2074.51    183.85 o 
  -9   7  15       82.69      193.11    140.22 o 
  -8   7  15      563.98      528.71    142.59 o 
  -7   7  15      946.26     1025.75    149.44 o 
  -6   7  15      452.73       88.50    131.67 o 
  -5   7  15       10.91      226.19    113.18 o 
  -4   7  15     3564.15     4091.19    170.01 o 
  -3   7  15      803.62      848.45    120.59 o 
  -2   7  15      315.47      139.32    112.65 o 
  -1   7  15     2779.30     2722.68    163.77 o 
   0   7  15     4219.08     4187.36    172.07 o 
   1   7  15     1190.90     1287.42    134.20 o 
   2   7  15     4036.13     4243.50    225.39 o 
   3   7  15       61.26      -87.04    119.11 o 
   4   7  15     1995.52     1965.93    167.31 o 
   5   7  15      136.91       37.14    154.56 o 
   6   7  15     3879.35     3938.35    223.50 o 
   7   7  15     1435.24     1421.66    202.14 o 
   8   7  15     5244.97     4963.64    290.13 o 
   9   7  15        2.02     -203.70    203.70 o 
  10   7  15     2075.57     1448.64    272.81 o 
  11   7  15        6.93     -229.67    229.67 o 
  12   7  15     1730.40      815.42    286.46 o 
 -20   8  15      258.28      292.11    188.45 o 
 -19   8  15     6291.54     6150.51    363.92 o 
 -18   8  15      866.30      532.85    241.87 o 
 -17   8  15    10806.83    10445.93    290.63 o 
 -16   8  15      988.40      879.99    158.10 o 
 -15   8  15     8670.16     8620.03    254.58 o 
 -14   8  15     3186.75     3285.48    229.57 o 
 -13   8  15    10057.88     9929.14    314.05 o 
 -12   8  15     3413.26     3578.90    230.35 o 
 -11   8  15    10898.95    10791.33    303.66 o 
 -10   8  15     1879.48     1801.31    179.86 o 
  -9   8  15     7990.82     8254.75    343.63 o 
  -8   8  15      628.89      383.23    145.09 o 
  -7   8  15    18549.23    19400.49    384.42 o 
  -6   8  15     1161.83     1223.58    211.55 o 
  -5   8  15    17595.79    17484.45    332.82 o 
  -4   8  15     9557.31     9117.12    263.07 o 
  -3   8  15    24505.89    24502.14    376.27 o 
  -2   8  15     1912.35     2060.59    151.72 o 
  -1   8  15    12645.12    12463.43    332.87 o 
   0   8  15     1767.74     1807.93    141.41 o 
   1   8  15    13345.77    13520.65    271.87 o 
   2   8  15     4495.32     4298.00    238.20 o 
   3   8  15    12829.36    13397.97    297.68 o 
   4   8  15     4237.44     4089.83    218.93 o 
   5   8  15    10493.73    11297.89    307.44 o 
   6   8  15     6381.80     5780.54    267.86 o 
   7   8  15    11114.84    11680.52    359.56 o 
   8   8  15     2880.95     2844.17    239.98 o 
   9   8  15     8680.64     9647.99    384.46 o 
  10   8  15      703.41      426.91    211.79 o 
  11   8  15     8789.51    10514.80    490.27 o 
 -19   9  15      580.08      303.00    176.13 o 
 -18   9  15       22.47     -180.15    180.15 o 
 -17   9  15     2652.51     2427.41    180.07 o 
 -16   9  15      225.38      148.72    186.77 o 
 -15   9  15     2061.29     1687.29    210.53 o 
 -14   9  15       58.31     -148.70    161.32 o 
 -13   9  15     1908.93     2001.35    203.16 o 
 -12   9  15      165.26     -123.37    157.20 o 
 -11   9  15     2525.20     2638.42    214.61 o 
 -10   9  15      211.39      446.50    157.63 o 
  -9   9  15     4795.67     4669.37    248.22 o 
  -8   9  15      526.24      360.03    201.94 o 
  -7   9  15     1620.94     1489.65    169.63 o 
  -6   9  15     3182.62     3377.33    186.86 o 
  -5   9  15     2397.73     2203.87    164.33 o 
  -4   9  15      990.89      805.85    144.32 o 
  -3   9  15     7975.68     8186.35    238.71 o 
  -2   9  15      649.26      610.12    134.55 o 
  -1   9  15      709.14      584.58    196.34 o 
   0   9  15       76.32        7.84    144.92 o 
   1   9  15     2776.96     2716.99    159.22 o 
   2   9  15        0.82     -121.30    121.30 o 
   3   9  15      207.18       95.45    162.95 o 
   4   9  15       12.19       14.27    134.90 o 
   5   9  15     3010.64     2779.33    220.10 o 
   6   9  15       97.70       14.71    181.09 o 
   7   9  15     1257.99      699.80    192.81 o 
   8   9  15      349.06     -177.18    177.18 o 
   9   9  15     4763.88     4549.15    295.06 o 
  10   9  15       73.79     -163.65    202.19 o 
 -18  10  15     7174.62     7041.17    351.89 o 
 -17  10  15     1339.02      853.01    203.06 o 
 -16  10  15     8960.88     9670.37    433.34 o 
 -15  10  15     1976.82     1581.40    212.02 o 
 -14  10  15     8263.90     7877.99    417.60 o 
 -13  10  15     3198.06     2876.21    229.16 o 
 -12  10  15     5173.40     5535.64    264.00 o 
 -11  10  15     1290.39     1101.14    180.65 o 
 -10  10  15     5149.36     5973.00    304.81 o 
  -9  10  15     4367.02     4678.20    239.47 o 
  -8  10  15    11188.97    10357.50    303.49 o 
  -7  10  15     2535.94     2689.68    184.33 o 
  -6  10  15     8350.75     8209.47    256.29 o 
  -5  10  15     4153.69     3931.42    200.62 o 
  -4  10  15    15151.36    14474.70    310.90 o 
  -3  10  15     3257.70     3296.00    182.77 o 
  -2  10  15    11154.93    11438.30    351.08 o 
  -1  10  15      767.75      698.49    176.36 o 
   0  10  15     5746.17     6416.66    260.18 o 
   1  10  15     4222.98     4222.36    229.23 o 
   2  10  15     9862.10    10452.47    326.35 o 
   3  10  15     2858.16     2974.79    252.90 o 
   4  10  15     3551.51     4065.53    226.96 o 
   5  10  15     2752.81     2392.91    209.91 o 
   6  10  15     3383.03     4414.21    330.07 o 
   7  10  15     1591.34     1482.46    272.80 o 
   8  10  15     3521.36     4851.49    482.71 o 
   9  10  15      688.62      376.47    205.93 o 
 -16  11  15      750.56      647.56    200.17 o 
 -15  11  15       53.40     -174.58    185.06 o 
 -14  11  15     1132.74     1103.57    197.28 o 
 -13  11  15        1.56       -2.71    188.25 o 
 -12  11  15     2518.02     2511.27    219.08 o 
 -11  11  15       13.68      -47.02    165.70 o 
 -10  11  15     1920.12     1734.92    196.43 o 
  -9  11  15       60.36       77.57    162.78 o 
  -8  11  15      913.73      768.16    210.58 o 
  -7  11  15      600.86      308.44    154.26 o 
  -6  11  15     5060.84     5083.53    226.48 o 
  -5  11  15     1495.80     1236.11    160.25 o 
  -4  11  15     6083.59     5863.04    244.78 o 
  -3  11  15      540.75      336.38    177.24 o 
  -2  11  15     1953.52     1575.30    214.57 o 
  -1  11  15      192.91     -166.52    166.52 o 
   0  11  15     3437.75     3045.79    262.15 o 
   1  11  15      600.67      486.67    202.02 o 
   2  11  15      789.88      161.72    187.98 o 
   3  11  15       10.42     -185.30    185.30 o 
   4  11  15      559.37      163.67    228.29 o 
   5  11  15       48.50      118.90    160.43 o 
   6  11  15     1689.83     1293.83    208.12 o 
   7  11  15      783.70      139.83    188.80 o 
 -13  12  15     4892.56     5044.89    387.97 o 
 -12  12  15     3238.07     2839.44    283.05 o 
 -11  12  15     3920.23     3929.56    241.00 o 
 -10  12  15     4788.48     5133.04    491.07 o 
  -9  12  15     7117.46     7101.67    268.10 o 
  -8  12  15     5691.78     5949.03    254.25 o 
  -7  12  15     6403.28     6596.91    250.56 o 
  -6  12  15     1879.45     1576.16    180.34 o 
  -5  12  15     2915.17     2876.47    195.67 o 
  -4  12  15     3531.86     3672.93    207.87 o 
  -3  12  15     7165.22     7458.55    477.24 o 
  -2  12  15      709.47      518.91    293.78 o 
  -1  12  15     4946.51     5502.83    327.50 o 
   0  12  15     1353.88      620.63    231.24 o 
   1  12  15     4207.76     4598.81    366.86 o 
   2  12  15     1990.22     1531.95    357.24 o 
   3  12  15     3005.04     3541.69    443.05 o 
   4  12  15     2835.35     2705.07    364.70 o 
 -10  13  15      337.76      -82.90    270.31 o 
  -9  13  15      389.58      364.54    173.41 o 
  -8  13  15        7.40      -12.07    172.97 o 
  -7  13  15      337.58      229.05    174.48 o 
  -6  13  15      236.37     -209.75    209.75 o 
  -5  13  15     2507.61     2087.51    200.58 o 
  -4  13  15      677.95      300.63    211.10 o 
  -3  13  15      375.52      280.14    326.20 o 
  -2  13  15      995.64      711.54    340.42 o 
  -1  13  15     2501.69     2250.27    312.53 o 
   0  13  15      111.99       65.36    273.98 o 
   1  13  15     1362.06      353.56    275.35 o 
 -24   0  16      797.36      263.30    377.32 o 
 -22   0  16     7013.00     6617.69    580.01 o 
 -20   0  16     1517.43      663.81    270.26 o 
 -18   0  16     5662.95     5316.85    361.13 o 
 -16   0  16    11726.09    11329.95    675.33 o 
 -14   0  16    21640.75    21365.57    457.13 o 
 -12   0  16    17395.41    17338.11    493.33 o 
 -10   0  16    20375.65    20039.69    442.77 o 
  -8   0  16     1829.66     2085.70    186.22 o 
  -6   0  16    49071.28    49336.18    810.93 o 
  -4   0  16     9900.23    10120.73    378.03 o 
  -2   0  16     9194.53     9873.53    264.01 o 
   0   0  16    16288.81    16590.08    345.38 o 
   2   0  16     2239.53     3162.80    328.18 o 
   4   0  16     3723.77     3870.85    245.47 o 
   6   0  16     4481.77     4751.99    275.14 o 
   8   0  16      197.54      302.10    182.79 o 
  10   0  16     1270.39      874.30    242.12 o 
  12   0  16     3168.74     2968.24    310.48 o 
  14   0  16     1419.21     1005.54    305.01 o 
 -24   1  16     2700.25     2566.30    326.41 o 
 -23   1  16     2021.47     1913.45    298.70 o 
 -22   1  16     6203.48     6705.36    352.63 o 
 -21   1  16     7166.04     7408.58    351.06 o 
 -20   1  16    11874.77    11417.70    618.97 o 
 -19   1  16     4334.51     4678.32    287.72 o 
 -18   1  16     7704.77     8730.75    303.30 o 
 -17   1  16     5853.77     6501.65    271.47 o 
 -16   1  16     8321.86     8791.77    250.55 o 
 -15   1  16    12262.47    12459.67    274.73 o 
 -14   1  16    10315.57    11001.33    226.87 o 
 -13   1  16    17049.70    16562.78    317.65 o 
 -12   1  16    15365.93    15522.90    241.49 o 
 -11   1  16     7146.10     7263.85    173.69 o 
 -10   1  16    26425.30    26289.10    333.37 o 
  -9   1  16    13044.82    12548.92    223.59 o 
  -8   1  16     7983.97     7917.70    175.53 o 
  -7   1  16     5993.92     6296.18    158.76 o 
  -6   1  16    10908.68    10900.94    233.39 o 
  -5   1  16    10094.02     9953.08    189.56 o 
  -4   1  16    17172.09    16873.43    267.00 o 
  -3   1  16    13141.11    12927.67    229.59 o 
  -2   1  16    14814.20    14619.45    231.42 o 
  -1   1  16     5207.69     5032.74    159.03 o 
   0   1  16    13135.24    12984.24    224.89 o 
   1   1  16    20553.73    20521.53    298.59 o 
   2   1  16     7622.97     7323.08    182.92 o 
   3   1  16     2220.46     2310.73    139.16 o 
   4   1  16    10929.54    10431.51    232.89 o 
   5   1  16    11413.99    10865.73    242.55 o 
   6   1  16    15658.71    14304.42    286.56 o 
   7   1  16     2013.26     1666.75    149.55 o 
   8   1  16     8146.73     8138.79    243.26 o 
   9   1  16     8117.97     8027.36    248.30 o 
  10   1  16     6818.67     7024.87    242.97 o 
  11   1  16     4242.76     4057.70    209.36 o 
  12   1  16     4991.81     4693.95    245.70 o 
  13   1  16     5389.15     5468.43    263.38 o 
  14   1  16     6177.38     6995.91    298.66 o 
 -24   2  16      803.70      765.77    256.14 o 
 -23   2  16     2616.05     2521.89    285.75 o 
 -22   2  16       74.06       83.48    223.11 o 
 -21   2  16     3744.84     4378.30    277.92 o 
 -20   2  16      319.82      347.44    189.51 o 
 -19   2  16     3317.98     3206.35    231.40 o 
 -18   2  16       13.46      -82.08    152.70 o 
 -17   2  16     4369.83     4486.16    212.99 o 
 -16   2  16      102.55     -122.47    122.47 o 
 -15   2  16     4399.98     4844.23    230.69 o 
 -14   2  16       32.62      -90.57    105.01 o 
 -13   2  16     1547.69     1422.86    139.97 o 
 -12   2  16      763.14      474.87    106.66 o 
 -11   2  16     1945.87     1779.72    117.30 o 
 -10   2  16      215.91       92.79     87.78 o 
  -9   2  16     7734.40     7683.11    167.22 o 
  -8   2  16      368.19      129.99     80.49 o 
  -7   2  16     6954.77     7283.94    166.76 o 
  -6   2  16      420.15      345.62     83.75 o 
  -5   2  16    20572.31    22223.39    299.80 o 
  -4   2  16      711.60      647.17     84.77 o 
  -3   2  16     3224.43     3963.83    126.43 o 
  -2   2  16     1539.43     1687.27    101.83 o 
  -1   2  16    20118.75    21191.71    280.35 o 
   0   2  16     2487.18     2445.30    154.97 o 
   1   2  16     2599.88     3313.04    148.66 o 
   2   2  16      316.58      451.98    121.37 o 
   3   2  16     2485.40     3187.11    151.24 o 
   4   2  16      746.63      778.36    118.76 o 
   5   2  16     3336.26     3945.27    172.92 o 
   6   2  16      295.54      -23.97    115.50 o 
   7   2  16     1783.08     2007.61    153.71 o 
   8   2  16      949.94      959.44    143.01 o 
   9   2  16     3795.37     3467.80    201.09 o 
  10   2  16      105.01      141.03    144.36 o 
  11   2  16     2064.68     2124.54    188.66 o 
  12   2  16       35.87     -152.92    152.92 o 
  13   2  16     1296.90      532.52    178.54 o 
  14   2  16      602.80      482.56    196.95 o 
 -24   3  16     2395.33     2891.57    546.18 o 
 -23   3  16     6817.79     7923.11    393.71 o
[truncated: 185,801 more chars]
